# Supplementary material for: Theoretical Study of Hydroxylation of α- and β-Pinene by a Cytochrome P450 Monooxygenase Model
Source: MDPI journal article supplement (doi:10.3390/ijms24065150), 2023-03-08
Supplement: s1 [file s1]

# **Biocatalytic hydroxylation of $\alpha$ - and $\beta$ -Pinene by Cytochrome P450: A systematic DFT study**

Janah Shaya,\* Lujain Aloum, Chungshin Lu, Peter Corridon, Abdulrahman Aoudi, Abeer Shunnar, Eman Alefishet, Georg Petroianu\*

## **Table of contents**

**Figure S1: DFT/LAN level optimized transition state structures for the hydrogen transfer to CYP through trans reaction path in the doublet state for the R and S  $\beta$ -pinene enantiomers.**

**Table S1: Gibbs free energy coordinates of the reaction R/S and cis/trans paths for the  $\beta$ -pinene. Data are provided in kcal/mol.**

**Table S2: Coordinates of the reaction pathways displayed in Figure 4 ( $\beta$ -pinene). Data are provided in kcal/mol.**

**Table S3-10. Absolute energies, kinetic, and thermodynamic calculated parameters of the hydrogen abstraction and rebound mechanism of the  $\beta$ -pinene catalyzed by CYP enzyme**

**Figure S2: Gibbs free energy for the  $\beta$ -pinene reaction coordinated. DFT/LAN refers to our standard method whereas B3LYP to the results obtained with the B3LYP functional and mixed basis set approach (LANL2DZ on iron atom and 6-31G(d) in all remaining atoms) without D4 and BSSE.**

**Table S11: Coordinates to the reaction paths displayed in Figure 7 ( $\alpha$ -pinene). Data are provided in kcal/mol.**

**Figure S3: Reaction coordinate for the Gibbs free energies from the hydrogen abstraction and rebound mechanism of the  $\alpha$ -pinene catalyzed by CYP enzyme.**

**Table S12 and Figure S4: electronic analysis of  $\alpha$ -pinene: Mulliken and NPA charges and spin population in doublet and quartet states for epsilon cis and trans paths**

**Table S13: Coordinates Beta-Pinene**

**Table S14: Coordinates Alpha-Pinene**

# $\beta$ -pinene

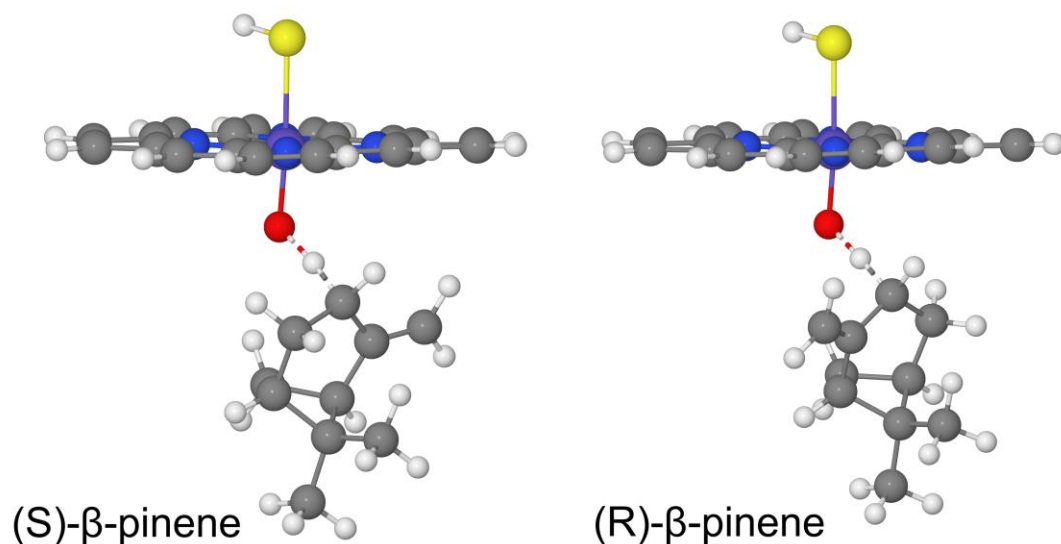

**Figure S1: DFT/LAN level optimized transition state structures for the hydrogen transfer to CYP through trans reaction path in the doublet state for the R and S  $\beta$ -pinene enantiomers.**

**Table S1: Gibbs free energy coordinates of the reaction R/S and cis/trans paths for the  $\beta$  -pinene. Data are provided in kcal/mol.**

| RC | Site               | Spin  | G <sub>ref</sub> (kcal/mol) |   | RC    | Site               | Spin  | G <sub>ref</sub> (kcal/mol) |
|----|--------------------|-------|-----------------------------|---|-------|--------------------|-------|-----------------------------|
| 1  | Delta<br>cis-(S)   | S=1/2 | 0.733                       |   | 1     | Delta<br>cis-(R)   | S=1/2 | 0.733                       |
| 2  |                    |       | 13.1                        | 2 | 13.1  |                    |       |                             |
| 3  |                    |       | -6.57                       | 3 | -6.32 |                    |       |                             |
|    |                    |       |                             |   |       |                    |       |                             |
| 1  | Delta<br>trans-(S) | S=1/2 | 1.08                        |   | 1     | delta<br>trans-(R) | S=1/2 | 1.07                        |
| 2  |                    |       | 11.9                        | 2 | 11.9  |                    |       |                             |
| 3  |                    |       | -7.22                       | 3 | -7.26 |                    |       |                             |

**Table S2: Coordinates of the reaction pathways displayed in Figure 4 ( $\beta$ -pinene). Data are provided in kcal/mol.**

| RC | Site             | Spin  | G <sub>ref</sub> (kcal/mol) | RC | Site               | Spin  | G <sub>ref</sub> (kcal/mol) |
|----|------------------|-------|-----------------------------|----|--------------------|-------|-----------------------------|
| 1  | Delta<br>cis-(R) | S=1/2 | 0.733                       | 1  | Delta<br>trans-(S) | S=1/2 | 1.08                        |
| 2  |                  |       | 13.1                        | 2  |                    |       | 11.9                        |
| 3  |                  |       | -6.32                       | 3  |                    |       | -7.22                       |
| 5  |                  |       | -46.7                       | 5  |                    |       | -47.3                       |
|    |                  |       |                             |    |                    |       |                             |
| 1  | Delta<br>cis-(R) | S=3/2 | 0.303                       | 1  | Delta<br>trans-(S) | S=3/2 | 1.83                        |
| 2  |                  |       | 13.9                        | 2  |                    |       | 11.7                        |
| 3  |                  |       | -2.34                       | 3  |                    |       | -3.25                       |
| 5  |                  |       | -43.0                       | 5  |                    |       | -45.3                       |
|    |                  |       |                             |    |                    |       |                             |
| 1  | Delta<br>cis-(R) | S=5/2 | 13.6                        | 1  | Delta<br>trans-(S) | S=5/2 | 14.3                        |
| 2  |                  |       | 26.5                        | 2  |                    |       | 24.4                        |
| 3  |                  |       | 4.46                        | 3  |                    |       | 2.76                        |
| 5  |                  |       | -40.3                       | 5  |                    |       | -39.9                       |
|    |                  |       |                             |    |                    |       |                             |
| 1  | Alpha            | S=1/2 | 0                           | 1  | Alpha              | S=3/2 | 4.44                        |
| 2  |                  |       | 15.3                        | 2  |                    |       | 17.2                        |
| 3  |                  |       | 14.0                        | 3  |                    |       | 15.3                        |
| 5  |                  |       | -50.0                       | 5  |                    |       | -38.9                       |

**Table S3-10. Absolute energies, kinetic, and thermodynamic calculated parameters of the hydrogen abstraction and rebound mechanism of the  $\beta$ -pinene catalyzed by CYP enzyme**

Table S3

| RC | Site             | Spin  | E (hartree)      |                 | H (hartree)      |                 | G (hartree)      |                 | G <sub>corr</sub> (hartree) |                 | G <sub>ref</sub> (kcal/mol) |  |
|----|------------------|-------|------------------|-----------------|------------------|-----------------|------------------|-----------------|-----------------------------|-----------------|-----------------------------|--|
| 1  | Delta<br>cis-(R) | S=1/2 | -1976.464644     |                 | -1975.905984     |                 | -1976.010839     |                 | -1976.036419                |                 | 0.733                       |  |
| 2  |                  |       | -1976.436944     |                 | -1975.885510     |                 | r-1975.982825    |                 | -1976.016663                |                 | 13.1                        |  |
| 3  |                  |       | -1976.471199     |                 | -1975.915749     |                 | -1976.016923     |                 | -1976.047659                |                 | -6.32                       |  |
| 4  |                  |       | -1976.542622     |                 | -1975.981161     |                 | -1976.077844     |                 | -1976.047659                |                 | -46.7                       |  |
|    |                  |       | Δ <sub>r</sub> E | ΔE <sup>‡</sup> | Δ <sub>r</sub> H | ΔH <sup>‡</sup> | Δ <sub>r</sub> G | ΔG <sup>‡</sup> | Δ <sub>r</sub> G            | ΔG <sup>‡</sup> |                             |  |
|    |                  |       | -6.13            | 14.3            | -8.14            | 9.80            | -5.83            | 14.5            | -7.05                       | 12.4            |                             |  |
| 5  |                  |       | -1976.542622     |                 | -1975.981161     |                 | -1976.077844     |                 | -1976.047659                |                 | -46.7                       |  |

Table S4

| RC           | Site               | Spin  | E (hartree)         |              | H (hartree)         |              | G (hartree)         |              | G <sub>corr</sub> (hartree) |  | G <sub>ref</sub> (kcal/mol) |
|--------------|--------------------|-------|---------------------|--------------|---------------------|--------------|---------------------|--------------|-----------------------------|--|-----------------------------|
| 1            | Delta<br>trans-(S) | S=1/2 | -1976.464943        |              | -1975.907286        |              | -1976.008524        |              | -1976.035861                |  | 1.08                        |
| 2            |                    |       | -1976.440476        |              | -1975.88986         |              | -1975.983947        |              | -1976.018613                |  | 11.9                        |
| 3            |                    |       | -1976.472341        |              | -1975.916147        |              | -1976.01666         |              | -1976.049090                |  | -7.22                       |
| $\Delta_r E$ |                    |       | $\Delta E^\ddagger$ | $\Delta_r H$ | $\Delta H^\ddagger$ | $\Delta_r G$ | $\Delta G^\ddagger$ | $\Delta_r G$ | $\Delta G^\ddagger$         |  |                             |
| -7.15        |                    |       | 12.7                | -8.07        | 8.28                | -7.61        | 12.8                | -8.30        | 10.8                        |  |                             |
| 5            |                    |       | -1976.543869        |              | -1975.982237        |              | -1976.077783        |              | -1976.113000                |  | -47.3                       |

Table S5

| RC           | Site             | Spin  | E (hartree)         |              | H (hartree)         |              | G (hartree)         |              | G <sub>corr</sub> (hartree) |  | G <sub>ref</sub> (kcal/mol) |
|--------------|------------------|-------|---------------------|--------------|---------------------|--------------|---------------------|--------------|-----------------------------|--|-----------------------------|
| 1            | Delta<br>cis-(R) | S=3/2 | -1976.46457         |              | -1975.905903        |              | -1976.011667        |              | -1976.037104                |  | 0.303                       |
| 2            |                  |       | -1976.434772        |              | -1975.883835        |              | -1975.981656        |              | -1976.015384                |  | 13.9                        |
| 3            |                  |       | -1976.464861        |              | -1975.908434        |              | -1976.012541        |              | -1976.411318                |  | -2.34                       |
| $\Delta_r E$ |                  |       | $\Delta E^\ddagger$ | $\Delta_r H$ | $\Delta H^\ddagger$ | $\Delta_r G$ | $\Delta G^\ddagger$ | $\Delta_r G$ | $\Delta G^\ddagger$         |  |                             |
| -1.56        |                  |       | 15.8                | -2.97        | 11.0                | -1.93        | 16.0                | -2.64        | 13.6                        |  |                             |
| 5            |                  |       | -1976.541342        |              | -1975.9804          |              | -1976.083168        |              | -1976.106051                |  | -43.0                       |

Table S6

| RC | Site               | Spin  | E (hartree)  |                     | H (hartree)  |                     | G (hartree)  |                     | G <sub>corr</sub> (hartree) |                     | G <sub>ref</sub> (kcal/mol) |
|----|--------------------|-------|--------------|---------------------|--------------|---------------------|--------------|---------------------|-----------------------------|---------------------|-----------------------------|
| 1  | Delta<br>trans-(S) | S=3/2 | -1976.464849 |                     | -1975.908104 |                     | -1976.006718 |                     | -1976.014863                |                     | 1.83                        |
| 2  |                    |       | -1976.438523 |                     | -1975.887415 |                     | -1975.985353 |                     | -1976.998706                |                     | 11.7                        |
| 3  |                    |       | -1976.466488 |                     | -1975.909948 |                     | -1976.01256  |                     | -1976.033183                |                     | -3.25                       |
|    |                    |       | $\Delta_r E$ | $\Delta E^\ddagger$ | $\Delta_r H$ | $\Delta H^\ddagger$ | $\Delta_r G$ | $\Delta G^\ddagger$ | $\Delta_r G$                | $\Delta G^\ddagger$ |                             |

|   |  |  |              |      |              |      |              |      |              |      |       |
|---|--|--|--------------|------|--------------|------|--------------|------|--------------|------|-------|
|   |  |  | -2.80        | 13.7 | -2.93        | 10.1 | -5.44        | 10.6 | -5.08        | 9.87 |       |
| 5 |  |  | -1976.541093 |      | -1975.980155 |      | -1976.081889 |      | -1976.109765 |      | -45.3 |

Table S7

| RC | Site             | Spin  | E (hartree)  |                     | H (hartree)  |                     | G (hartree)  |                     | G <sub>corr</sub> (hartree) |                     | G <sub>ref</sub> (kcal/mol) |
|----|------------------|-------|--------------|---------------------|--------------|---------------------|--------------|---------------------|-----------------------------|---------------------|-----------------------------|
| 1  | Delta<br>cis-(R) | S=5/2 | -1976.443747 |                     | -1975.888701 |                     | -1975.988506 |                     | -1976.015838                |                     | 13.6                        |
| 2  |                  |       | -1976.412542 |                     | -1975.863375 |                     | -1975.963336 |                     | -1975.995419                |                     | 26.5                        |
| 3  |                  |       | -1976.454139 |                     | -1975.900156 |                     | -1976.009698 |                     | -1976.030473                |                     | 4.46                        |
|    |                  |       | $\Delta_r E$ | $\Delta E^\ddagger$ | $\Delta_r H$ | $\Delta H^\ddagger$ | $\Delta_r G$ | $\Delta G^\ddagger$ | $\Delta_r G$                | $\Delta G^\ddagger$ |                             |
|    |                  |       | -4.05        | 17.1                | -4.71        | 13.4                | -10.8        | 13.3                | -9.18                       | 12.8                |                             |
| 5  |                  |       | -1976.536271 |                     | -1975.976652 |                     | -1976.079552 |                     | -1976.071875                |                     | -40.3                       |

Table S8

| RC | Site               | Spin  | E (hartree)  |                     | H (hartree)  |                     | G (hartree)  |                     | G <sub>corr</sub> (hartree) |                     | G <sub>ref</sub> (kcal/mol) |
|----|--------------------|-------|--------------|---------------------|--------------|---------------------|--------------|---------------------|-----------------------------|---------------------|-----------------------------|
| 1  | Delta<br>trans-(S) | S=5/2 | -1976.444039 |                     | -1975.889953 |                     | -1975.986953 |                     | -1976.014863                |                     | 14.3                        |
| 2  |                    |       | -1976.41644  |                     | -1975.866951 |                     | -1975.967057 |                     | -1975.998707                |                     | 24.4                        |
| 3  |                    |       | -1976.455762 |                     | -1975.901662 |                     | -1976.01097  |                     | -1976.033183                |                     | 2.76                        |
|    |                    |       | $\Delta_r E$ | $\Delta E^\ddagger$ | $\Delta_r H$ | $\Delta H^\ddagger$ | $\Delta_r G$ | $\Delta G^\ddagger$ | $\Delta_r G$                | $\Delta G^\ddagger$ |                             |
|    |                    |       | -6.04        | 14.8                | -6.03        | 11.9                | -13.8        | 10.0                | -11.5                       | 10.1                |                             |
| 5  |                    |       | -1976.536637 |                     | -1975.976788 |                     | -1976.080699 |                     | -1976.101882                |                     | -39.9                       |

Table S9

| RC | Site  | Spin  | E (hartree)  |                     | H (hartree)  |                     | G (hartree)  |                     | G <sub>corr</sub> (hartree) |                     | G <sub>ref</sub> (kcal/mol) |
|----|-------|-------|--------------|---------------------|--------------|---------------------|--------------|---------------------|-----------------------------|---------------------|-----------------------------|
| 1  | Alpha | S=1/2 | -1976.46467  |                     | -1975.906005 |                     | -1976.010884 |                     | -1976.037587                |                     | 0.00                        |
| 2  |       |       | -1976.430406 |                     | -1975.879146 |                     | -1975.975541 |                     | -1976.013197                |                     | 15.3                        |
| 3  |       |       |              |                     |              |                     |              |                     |                             |                     |                             |
|    |       |       | $\Delta_r E$ | $\Delta E^\ddagger$ | $\Delta_r H$ | $\Delta H^\ddagger$ | $\Delta_r G$ | $\Delta G^\ddagger$ | $\Delta_r G$                | $\Delta G^\ddagger$ |                             |
|    |       |       | 28.2         | 17.2                | 27.0         | 12.5                | 29.3         | 17.9                | 28.1                        | 15.3                |                             |
| 5  |       |       | -1976.544394 |                     | -1975.983319 |                     | -1976.079385 |                     | -1976.117318                |                     | -50.0                       |

Table S10

| RC | Site  | Spin  | E (hartree)  |  | H (hartree)  |  | G (hartree)  |  | G <sub>corr</sub> (hartree) |  | G <sub>ref</sub> (kcal/mol) |
|----|-------|-------|--------------|--|--------------|--|--------------|--|-----------------------------|--|-----------------------------|
| 1  | Alpha | S=3/2 | -1976.456701 |  | -1975.900247 |  | -1976.003103 |  | -1976.030510                |  | 4.44                        |
| 2  |       |       | -1976.426693 |  | -1975.87586  |  | -1975.973519 |  | -1976.010128                |  | 17.2                        |
| 3  |       |       | -1976.43598  |  | -1975.878618 |  | -1975.980278 |  | -1976.013237                |  | 15.3                        |

|   |  |  |              |                     |              |                     |              |                     |              |                     |       |
|---|--|--|--------------|---------------------|--------------|---------------------|--------------|---------------------|--------------|---------------------|-------|
|   |  |  | $\Delta_r E$ | $\Delta E^\ddagger$ | $\Delta_r H$ | $\Delta H^\ddagger$ | $\Delta_r G$ | $\Delta G^\ddagger$ | $\Delta_r G$ | $\Delta G^\ddagger$ |       |
|   |  |  | 9.89         | 14.4                | 10.5         | 10.9                | 11.2         | 14.2                | 10.8         | 12.8                |       |
| 5 |  |  | -1976.527012 |                     | -1975.967299 |                     | -1976.070319 |                     | -1976.099648 |                     | -38.9 |

**Figure S2: Gibbs free energy for the  $\beta$ -pinene reaction coordinated. DFT/LAN refers to our standard method whereas B3LYP to the results obtained with the B3LYP functional and mixed basis set approach (LANL2DZ on iron atom and 6-31G(d) in all remaining atoms) without D4 and BSSE.**

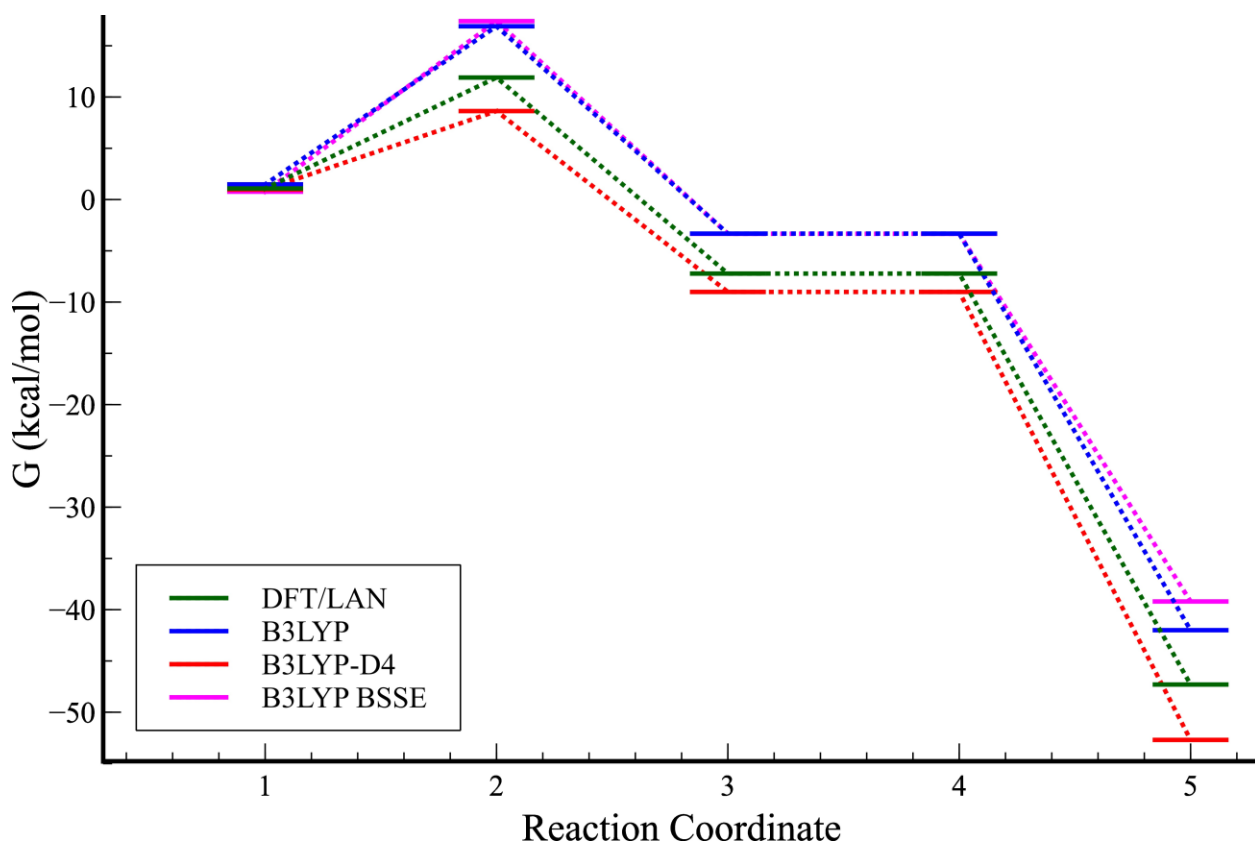

# $\alpha$ -pinene

**Table S11: Coordinates to the reaction paths displayed in Figure 7 ( $\alpha$ -pinene). Data are provided in kcal/mol.**

| RC | Site               | Spin  | G <sub>ref</sub> (kcal/mol) | RC | Site                 | Spin  | G <sub>ref</sub> (kcal/mol) |
|----|--------------------|-------|-----------------------------|----|----------------------|-------|-----------------------------|
| 1  | Epsilon<br>cis-(S) | S=1/2 | 2.41                        | 1  | Epsilon<br>trans-(R) | S=1/2 | 0.184                       |
| 2  |                    |       | 11.4                        | 2  |                      |       | 12.4                        |
| 3  |                    |       | -12.6                       | 3  |                      |       | -13.7                       |
| 5  |                    |       | -47.8                       | 5  |                      |       | -48.7                       |
|    |                    |       |                             |    |                      |       |                             |
| 1  | Epsilon<br>cis-(S) | S=3/2 | 1.07                        | 1  | Epsilon<br>trans-(R) | S=3/2 | 1.50                        |
| 2  |                    |       | 13.3                        | 2  |                      |       | 12.7                        |
| 3  |                    |       | -2.00                       | 3  |                      |       | -0.374                      |
| 5  |                    |       | -35.7                       | 5  |                      |       | -36.4                       |
|    |                    |       |                             |    |                      |       |                             |
| 1  | Epsilon<br>cis-(S) | S=5/2 | 13.2                        | 1  | Epsilon<br>trans-(R) | S=5/2 | 12.0                        |
| 2  |                    |       | 25.9                        | 2  |                      |       | 25.2                        |
| 3  |                    |       | -5.47                       | 3  |                      |       | -3.20                       |
| 5  |                    |       | -40.8                       | 5  |                      |       | -41.9                       |
|    |                    |       |                             |    |                      |       |                             |
| 1  | Alpha              | S=1/2 | 0.787                       | 1  | Alpha                | S=3/2 | 2.0                         |
| 2  |                    |       | 16.6                        | 2  |                      |       | 18.4                        |
| 3  |                    |       | 15.6                        | 3  |                      |       | 13.8                        |
| 5  |                    |       | -49.4                       | 5  |                      |       | -36.8                       |
|    |                    |       |                             |    |                      |       |                             |
| 1  | Gamma              | S=1/2 | 0                           | 1  | Gamma                | S=1/2 | 1.13                        |
| 2  |                    |       | 12.6                        | 2  |                      |       | 15.3                        |
| 3  |                    |       | -5.73                       | 3  |                      |       | -0.675                      |
| 5  |                    |       | -41.9                       | 5  |                      |       | -29.6                       |

**Figure S3: Reaction coordinate for the Gibbs free energies from the hydrogen abstraction and rebound mechanism of the  $\alpha$ -pinene catalyzed by CYP enzyme.**

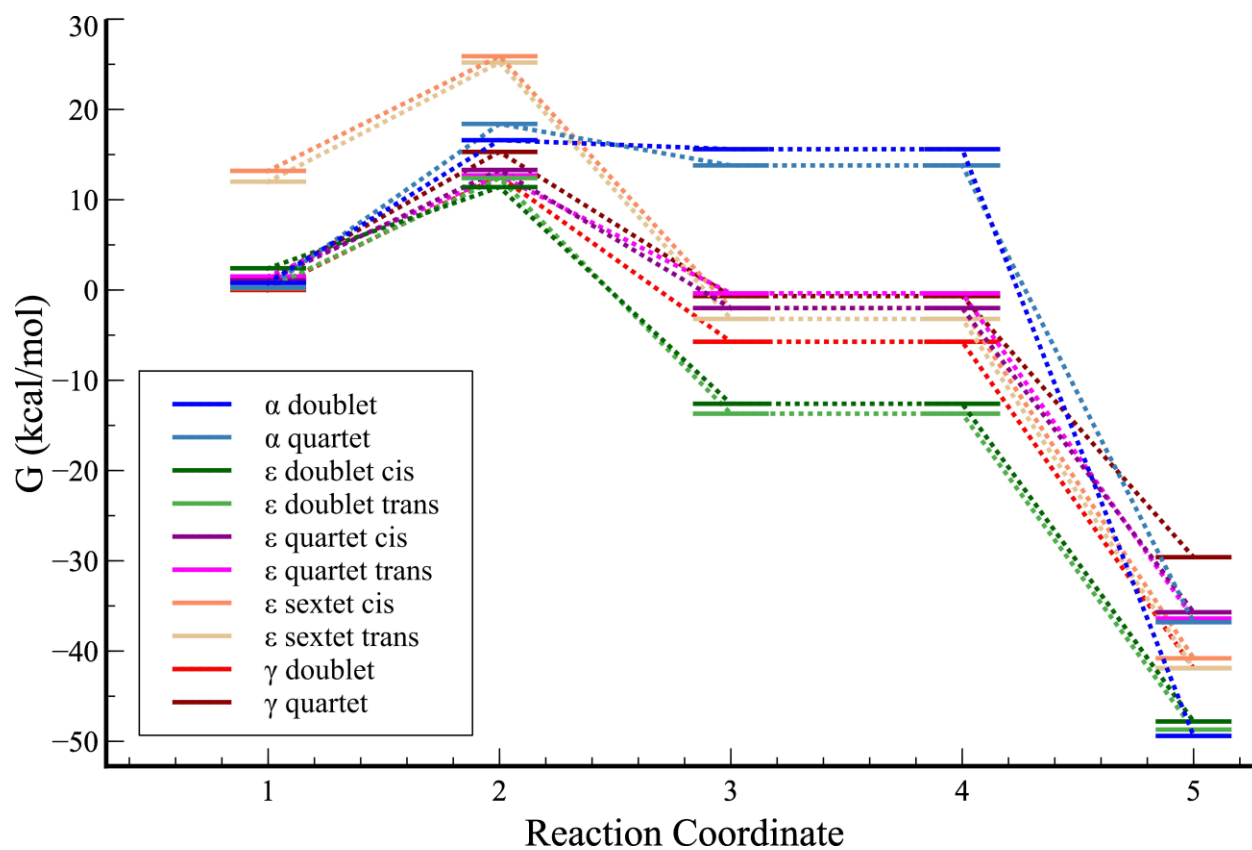



**Table S12 and Figure S4: electronic analysis of  $\alpha$ -pinene: Mulliken and NPA charges and spin population in doublet and quartet states for epsilon cis and trans paths**

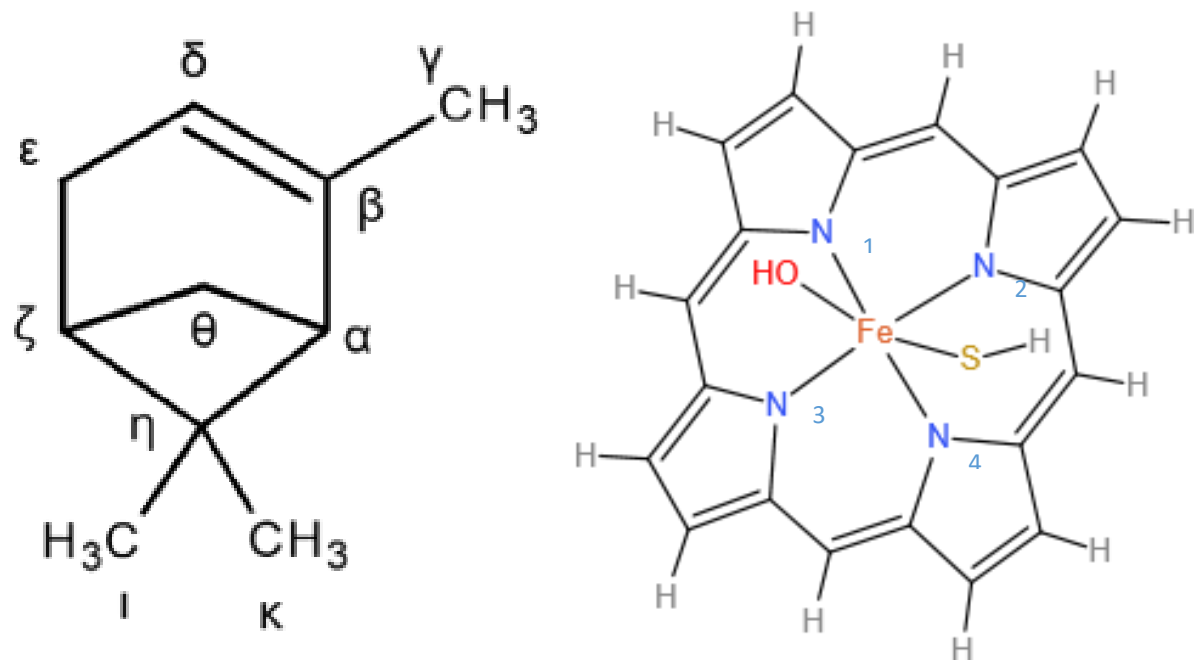

- Epsilon cis (doublet)

|     | Reactants |        |                     |                          | TS       |        |                     |                          | Products |        |                     |                          |
|-----|-----------|--------|---------------------|--------------------------|----------|--------|---------------------|--------------------------|----------|--------|---------------------|--------------------------|
|     | Mulliken  | NPA    | NBO spin Population | Mulliken spin Population | Mulliken | NPA    | NBO spin Population | Mulliken spin Population | Mulliken | NPA    | NBO spin Population | Mulliken spin Population |
| CYP |           |        |                     |                          |          |        |                     |                          |          |        |                     |                          |
| Fe  | 0.445     | 25.695 | 1.194               | 1.295                    | 0.370    | 25.690 | 1.028               | 1.093                    | 0.318    | 25.630 | 0.960               | 0.991                    |
| N1  | -0.516    | 7.394  | -0.132              | -0.138                   | -0.515   | 7.407  | -0.108              | -0.113                   | -0.519   | 7.451  | -0.015              | -0.015                   |
| N2  | -0.513    | 7.394  | -0.140              | -0.147                   | -0.498   | 7.405  | -0.114              | -0.119                   | -0.514   | 7.440  | -0.014              | -0.016                   |
| N4  | -0.515    | 7.395  | -0.138              | -0.144                   | -0.500   | 7.404  | -0.112              | -0.118                   | -0.515   | 7.439  | -0.015              | -0.015                   |

|                             |        |        |        |        |        |        |        |        |        |        |        |        |
|-----------------------------|--------|--------|--------|--------|--------|--------|--------|--------|--------|--------|--------|--------|
| N3                          | -0.513 | 7.393  | -0.132 | -0.138 | -0.521 | 7.407  | -0.012 | -0.120 | -0.526 | 7.456  | -0.014 | -0.016 |
| S                           | -0.375 | 16.480 | -0.253 | -0.268 | -0.344 | 16.453 | -0.166 | -0.178 | -0.469 | 16.581 | 0.006  | -0.001 |
| O                           | -0.465 | 8.305  | 0.893  | 0.821  | -0.565 | 8.459  | 0.596  | 0.561  | -0.743 | 8.811  | 0.091  | 0.078  |
| Alpha-pinene                |        |        |        |        |        |        |        |        |        |        |        |        |
| C - $\epsilon$              | -0.311 | 6.489  | 0.001  | 0.001  | -0.335 | 6.398  | 0.182  | 0.209  | 0.013  | 5.922  | 0.000  | 0.000  |
| C - $\zeta$                 | -0.124 | 6.236  | 0.000  | 0.000  | -0.129 | 6.246  | -0.006 | -0.009 | -0.186 | 6.307  | 0.000  | 0.000  |
| C - $\theta$                | -0.281 | 6.441  | 0.000  | 0.000  | -0.280 | 6.424  | 0.018  | 0.019  | -0.280 | 6.396  | 0.000  | 0.000  |
| C - $\alpha$                | -0.191 | 6.262  | 0.000  | 0.000  | -0.193 | 6.270  | -0.005 | -0.007 | -0.209 | 6.297  | 0.000  | 0.000  |
| C - $\eta$                  | 0.141  | 6.044  | 0.000  | 0.000  | 0.135  | 6.036  | 0.005  | 0.005  | 0.113  | 5.975  | 0.000  | 0.000  |
| C - $\beta$                 | 0.219  | 6.024  | 0.000  | 0.000  | 0.223  | 5.958  | 0.071  | 0.082  | 0.280  | 5.709  | 0.000  | 0.000  |
| C - $\delta$                | -0.226 | 6.241  | 0.000  | 0.000  | -0.187 | 6.237  | -0.051 | -0.063 | -0.175 | 6.321  | 0.000  | 0.000  |
| H - $\delta$                | 0.120  | 0.773  | 0.000  | 0.000  | 0.146  | 0.760  | 0.002  | 0.003  | 0.209  | 0.720  | 0.000  | 0.000  |
| C - $\gamma$                | -0.532 | 6.686  | 0.000  | 0.000  | -0.534 | 6.695  | -0.003 | -0.006 | -0.545 | 6.728  | 0.000  | 0.000  |
| H3 - $\gamma$               | 0.154  | 0.763  | 0.000  | 0.000  | 0.165  | 0.757  | 0.000  | 0.000  | 0.209  | 0.731  | 0.000  | 0.000  |
| H3 - $\gamma$               | 0.157  | 0.761  | 0.000  | 0.000  | 0.172  | 0.750  | 0.004  | 0.004  | 0.233  | 0.702  | 0.000  | 0.000  |
| H3 - $\gamma$               | 0.156  | 0.762  | 0.000  | 0.000  | 0.170  | 0.752  | 0.002  | 0.003  | 0.228  | 0.706  | 0.000  | 0.000  |
| H3 - $\gamma$ ( $\bar{x}$ ) | 0.156  | 0.762  | 0.000  | 0.000  | 0.169  | 0.753  | 0.002  | 0.002  | 0.223  | 0.713  | 0.000  | 0.000  |
| H - $\alpha$                | 0.111  | 0.758  | 0.000  | 0.000  | 0.126  | 0.750  | 0.000  | 0.000  | 0.185  | 0.717  | 0.000  | 0.000  |
| H - $\zeta$                 | 0.113  | 0.761  | 0.000  | 0.000  | 0.136  | 0.751  | 0.001  | 0.001  | 0.187  | 0.717  | 0.000  | 0.000  |
| H trans - $\epsilon$        | 0.140  | 0.757  | 0.000  | 0.000  | 0.179  | 0.736  | -0.005 | -0.005 | 0.227  | 0.724  | 0.000  | 0.000  |
| H cis - $\epsilon$          | 0.172  | 0.752  | 0.000  | 0.000  | 0.335  | 0.654  | -0.028 | -0.051 | 0.386  | 0.543  | -0.002 | -0.003 |
| C - I                       | -0.481 | 6.678  | 0.000  | 0.000  | -0.472 | 6.677  | 0.000  | 0.000  | -0.503 | 6.700  | 0.000  | 0.000  |
| H3 - I                      | 0.146  | 0.770  | 0.000  | 0.000  | 0.151  | 0.766  | 0.000  | 0.000  | 0.175  | 0.748  | 0.000  | 0.000  |
| H3 - I                      | 0.137  | 0.770  | 0.000  | 0.000  | 0.138  | 0.770  | 0.000  | 0.000  | 0.172  | 0.750  | 0.000  | 0.000  |
| H3 - I                      | 0.157  | 0.763  | 0.000  | 0.000  | 0.160  | 0.762  | 0.000  | 0.000  | 0.185  | 0.750  | 0.000  | 0.001  |
| H3 - I ( $\bar{x}$ )        | 0.147  | 0.768  | 0.000  | 0.000  | 0.150  | 0.766  | 0.000  | 0.000  | 0.177  | 0.749  | 0.000  | 0.000  |
| C - K                       | -0.472 | 6.669  | 0.000  | 0.000  | -0.473 | 6.670  | 0.000  | 0.000  | -0.475 | 6.682  | 0.000  | 0.000  |
| H3 - K                      | 0.142  | 0.769  | 0.000  | 0.000  | 0.148  | 0.765  | 0.000  | 0.000  | 0.177  | 0.745  | 0.000  | 0.000  |
| H3 - K                      | 0.146  | 0.770  | 0.000  | 0.000  | 0.149  | 0.769  | 0.000  | 0.000  | 0.170  | 0.757  | 0.000  | 0.000  |
| H3 - K                      | 0.141  | 0.769  | 0.000  | 0.000  | 0.147  | 0.766  | 0.000  | 0.000  | 0.177  | 0.745  | 0.000  | 0.000  |

|                             |       |       |       |       |       |       |        |        |       |       |       |       |
|-----------------------------|-------|-------|-------|-------|-------|-------|--------|--------|-------|-------|-------|-------|
| H3 - K ( $\bar{x}$ )        | 0.143 | 0.769 | 0.000 | 0.000 | 0.148 | 0.766 | 0.000  | 0.000  | 0.175 | 0.749 | 0.000 | 0.000 |
| H2 - $\theta$               | 0.139 | 0.766 | 0.000 | 0.000 | 0.152 | 0.759 | 0.000  | 0.000  | 0.198 | 0.733 | 0.000 | 0.000 |
| H2 - $\theta$               | 0.129 | 0.771 | 0.000 | 0.000 | 0.143 | 0.764 | -0.001 | -0.001 | 0.190 | 0.741 | 0.000 | 0.000 |
| H2 - $\theta$ ( $\bar{x}$ ) | 0.134 | 0.768 | 0.000 | 0.000 | 0.148 | 0.762 | -0.001 | -0.001 | 0.194 | 0.737 | 0.000 | 0.000 |

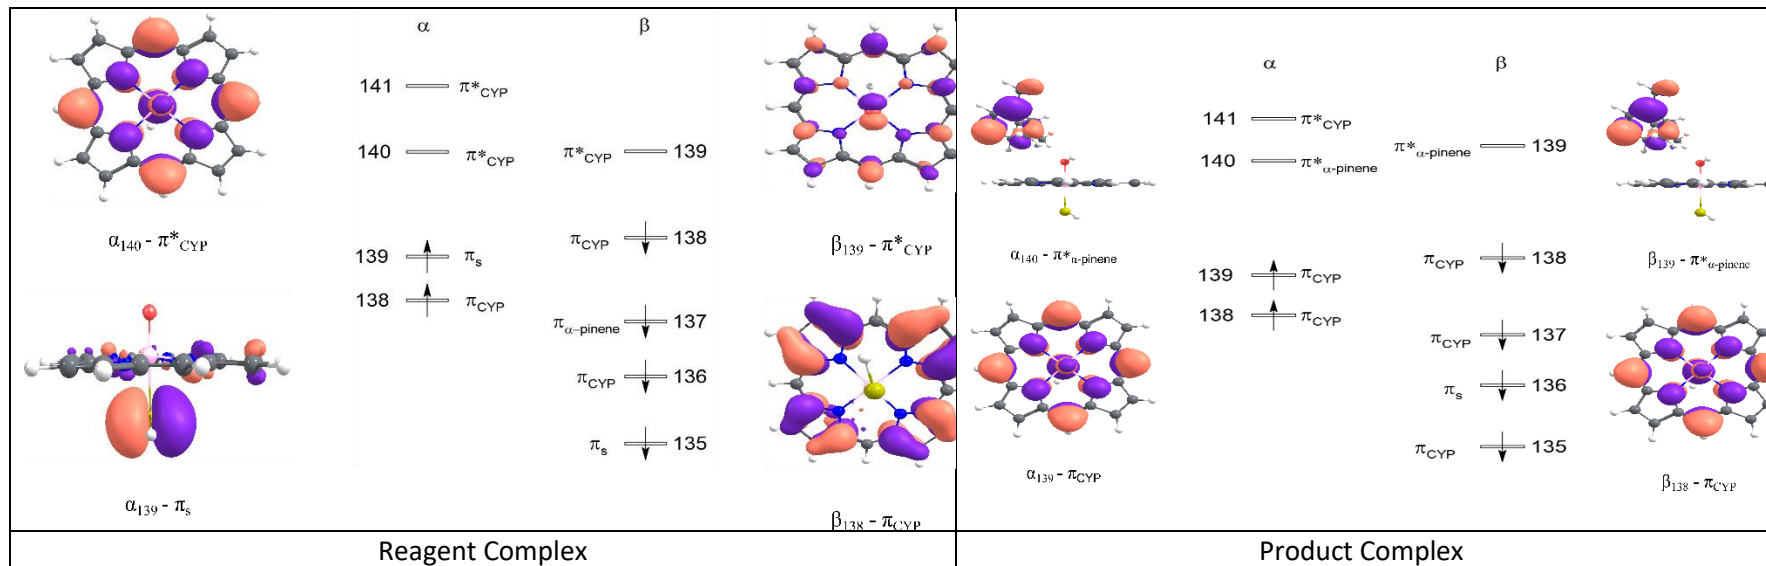

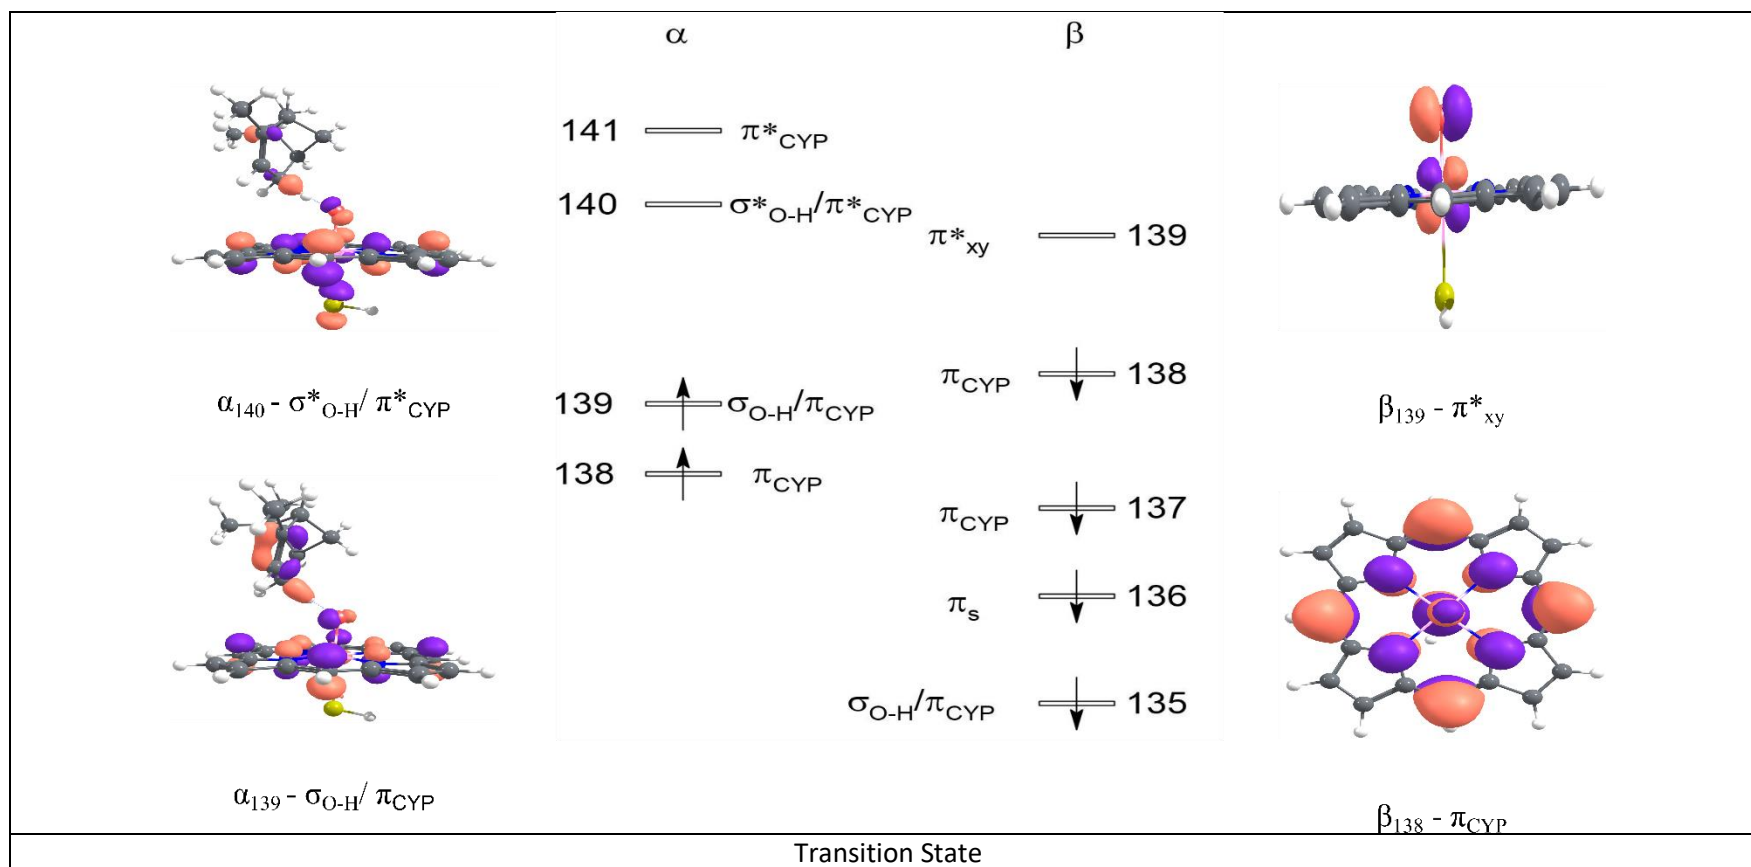

- Epsilon cis (quartet)

|     | Reactants |         |                     |                          | TS       |         |                     |                          | Products |         |                     |                          |
|-----|-----------|---------|---------------------|--------------------------|----------|---------|---------------------|--------------------------|----------|---------|---------------------|--------------------------|
|     | Mulliken  | NPA     | NBO spin Population | Mulliken spin Population | Mulliken | NPA     | NBO spin Population | Mulliken spin Population | Mulliken | NPA     | NBO spin Population | Mulliken spin Population |
| CYP |           |         |                     |                          |          |         |                     |                          |          |         |                     |                          |
| Fe  | 0.6163    | 25.2531 | 3.0360              | 3.2061                   | 0.5229   | 25.4690 | 1.8600              | 1.9221                   | 0.4247   | 25.5443 | 1.8770              | 1.9388                   |

|                         |         |         |         |         |         |         |         |         |         |         |         |         |
|-------------------------|---------|---------|---------|---------|---------|---------|---------|---------|---------|---------|---------|---------|
| N1                      | -0.5659 | 7.4843  | -0.0340 | -0.0654 | -0.5565 | 7.4434  | -0.0250 | -0.0251 | -0.5631 | 7.4412  | -0.0270 | -0.0280 |
| N2                      | -0.5544 | 7.4788  | -0.0460 | -0.0782 | -0.5578 | 7.4368  | -0.0250 | -0.0254 | -0.5494 | 7.4325  | -0.0330 | -0.0353 |
| N4                      | -0.5686 | 7.4863  | -0.0380 | -0.0701 | -0.5592 | 7.4392  | -0.0290 | -0.0294 | -0.5629 | 7.4433  | -0.0380 | -0.0310 |
| N3                      | -0.5548 | 7.4792  | -0.0350 | -0.0669 | -0.5558 | 7.4421  | -0.0230 | -0.0227 | -0.5612 | 7.4562  | -0.0300 | -0.0395 |
| S                       | -0.3192 | 16.4458 | -0.3060 | -0.3266 | -0.3315 | 16.4618 | -0.0430 | -0.0432 | -0.1919 | 16.3053 | -0.0060 | -0.0182 |
| O                       | -0.4936 | 8.3926  | 0.7220  | 0.6694  | -0.5722 | 8.4842  | 0.6680  | 0.6681  | -0.7063 | 8.7041  | 0.2460  | 0.2140  |
| Alpha-pinene            |         |         |         |         |         |         |         |         |         |         |         |         |
| C - $\epsilon$          | -0.3116 | 6.4890  | 0.0010  | 0.0009  | -0.3373 | 6.3847  | 0.3960  | 0.3961  | -0.1468 | 6.2100  | 0.5460  | 0.6005  |
| C - $\zeta$             | -0.1249 | 6.2363  | 0.0000  | 0.0000  | -0.1351 | 6.2518  | 0.0180  | -0.0176 | -0.1649 | 6.2823  | -0.1760 | -0.0524 |
| C - $\theta$            | -0.2816 | 6.4406  | 0.0000  | 0.0001  | -0.2797 | 6.4226  | 0.0550  | 0.0554  | -0.2774 | 6.4253  | 0.0610  | 0.0654  |
| C - $\alpha$            | -0.1912 | 6.2625  | 0.0000  | 0.0000  | -0.1936 | 6.2709  | -0.0200 | -0.0199 | -0.1954 | 6.2751  | -0.0290 | -0.0510 |
| C - $\eta$              | 0.1415  | 6.0437  | 0.0000  | -0.0001 | 0.1346  | 6.0357  | 0.0220  | 0.0215  | 0.1397  | 6.0286  | 0.0600  | 0.0708  |
| C - $\beta$             | 0.2197  | 6.0242  | 0.0000  | 0.0000  | 0.2265  | 5.9484  | 0.2670  | 0.2673  | 0.1830  | 5.9628  | 0.5240  | 0.5885  |
| C - $\delta$            | -0.2269 | 6.2411  | 0.0000  | -0.0001 | -0.1770 | 6.2365  | -0.1020 | -0.1019 | -0.1958 | 6.3053  | -0.1760 | -0.2421 |
| H - $\delta$            | 0.1211  | 0.7728  | 0.0000  | -0.0001 | 0.1491  | 0.7575  | 0.0040  | 0.0039  | 0.1377  | 0.7584  | 0.0050  | 0.0088  |
| C - $\gamma$            | -0.5317 | 6.6862  | 0.0000  | 0.0000  | -0.5339 | 6.6970  | -0.0200 | -0.0200 | -0.5339 | 6.7002  | 0.0270  | -0.0505 |
| H3 - $\gamma$           | 0.1541  | 0.7628  | 0.0000  | 0.0000  | 0.1660  | 0.7559  | 0.0000  | 0.0003  | 0.1603  | 0.7594  | 0.0010  | 0.0011  |
| H3 - $\gamma$           | 0.1570  | 0.7610  | 0.0000  | 0.0000  | 0.1740  | 0.7480  | 0.0150  | 0.0153  | 0.1640  | 0.7561  | 0.0250  | 0.0278  |
| H3 - $\gamma$           | 0.1558  | 0.7620  | 0.0000  | 0.0000  | 0.1719  | 0.7503  | 0.0110  | 0.0107  | 0.1628  | 0.7568  | 0.0250  | 0.0283  |
| H3 - $\gamma (\bar{x})$ | 0.1556  | 0.7619  | 0.0000  | 0.0000  | 0.1706  | 0.7514  | 0.0087  | 0.0088  | 0.1624  | 0.7575  | 0.0170  | 0.0190  |
| H - $\alpha$            | 0.1108  | 0.7582  | 0.0000  | 0.0000  | 0.1272  | 0.7494  | 0.0000  | 0.0000  | 0.1198  | 0.7532  | 0.0010  | 0.0008  |
| H - $\zeta$             | 0.1132  | 0.7608  | 0.0000  | 0.0000  | 0.1408  | 0.7489  | 0.0010  | 0.0010  | 0.1240  | 0.7509  | 0.0010  | 0.0009  |
| H trans - $\epsilon$    | 0.1409  | 0.7572  | 0.0000  | 0.0000  | 0.1875  | 0.7326  | 0.0010  | -0.0020 | 0.1536  | 0.7646  | -0.0170 | -0.0303 |
| H cis - $\epsilon$      | 0.1709  | 0.7523  | 0.0000  | 0.0000  | 0.3622  | 0.6257  | -0.0300 | -0.0302 | 0.4360  | 0.5066  | 0.0050  | 0.0152  |
| H2 - $\theta$           | 0.1289  | 0.7706  | 0.0000  | 0.0000  | 0.1447  | 0.7632  | -0.0020 | -0.0026 | 0.1374  | 0.7658  | -0.0020 | -0.0034 |
| H2 - $\theta$           | 0.1395  | 0.7654  | 0.0000  | 0.0000  | 0.1538  | 0.7579  | -0.0030 | -0.0021 | 0.1480  | 0.7622  | -0.0020 | -0.0030 |
| H2 - $\theta (\bar{x})$ | 0.1342  | 0.7680  | 0.0000  | 0.0000  | 0.1492  | 0.7606  | -0.0025 | -0.0023 | 0.1427  | 0.7640  | -0.0020 | -0.0032 |
| C - I                   | -0.4719 | 6.6686  | 0.0000  | 0.0000  | -0.4742 | 6.6702  | -0.0010 | -0.0010 | -0.4722 | 6.6712  | 0.0030  | -0.0054 |
| H3 - I                  | 0.1414  | 0.7692  | 0.0000  | 0.0000  | 0.1476  | 0.7650  | 0.0000  | 0.0004  | 0.1463  | 0.7660  | 0.0000  | 0.0028  |
| H3 - I                  | 0.1419  | 0.7688  | 0.0000  | 0.0000  | 0.1502  | 0.7648  | 0.0000  | 0.0011  | 0.1471  | 0.7654  | 0.0000  | 0.0028  |

|                      |         |        |        |        |         |        |         |         |         |        |         |         |
|----------------------|---------|--------|--------|--------|---------|--------|---------|---------|---------|--------|---------|---------|
| H3 - I               | 0.1457  | 0.7704 | 0.0000 | 0.0000 | 0.1497  | 0.7685 | 0.0000  | 0.0000  | 0.1490  | 0.7687 | 0.0000  | 0.0001  |
| H3 - I ( $\bar{x}$ ) | 0.1430  | 0.7694 | 0.0000 | 0.0000 | 0.1492  | 0.7661 | 0.0000  | 0.0005  | 0.1475  | 0.7667 | 0.0000  | 0.0019  |
| C - K                | -0.4775 | 6.6781 | 0.0000 | 0.0000 | -0.4799 | 6.6792 | -0.0010 | -0.0010 | -0.4808 | 6.6780 | -0.0020 | -0.0026 |
| H3 - K               | 0.1431  | 0.7701 | 0.0000 | 0.0000 | 0.1554  | 0.7661 | 0.0000  | -0.0001 | 0.1519  | 0.7674 | 0.0000  | 0.0000  |
| H3 - K               | 0.1370  | 0.7702 | 0.0000 | 0.0000 | 0.1402  | 0.7682 | 0.0000  | 0.0004  | 0.1412  | 0.7682 | 0.0000  | -0.0001 |
| H3 - K               | 0.1547  | 0.7635 | 0.0000 | 0.0000 | 0.1601  | 0.7611 | 0.0000  | -0.0007 | 0.1557  | 0.7654 | 0.0000  | -0.0008 |
| H3 - K ( $\bar{x}$ ) | 0.1449  | 0.7679 | 0.0000 | 0.0000 | 0.1519  | 0.7651 | 0.0000  | -0.0001 | 0.1496  | 0.7670 | 0.0000  | -0.0003 |

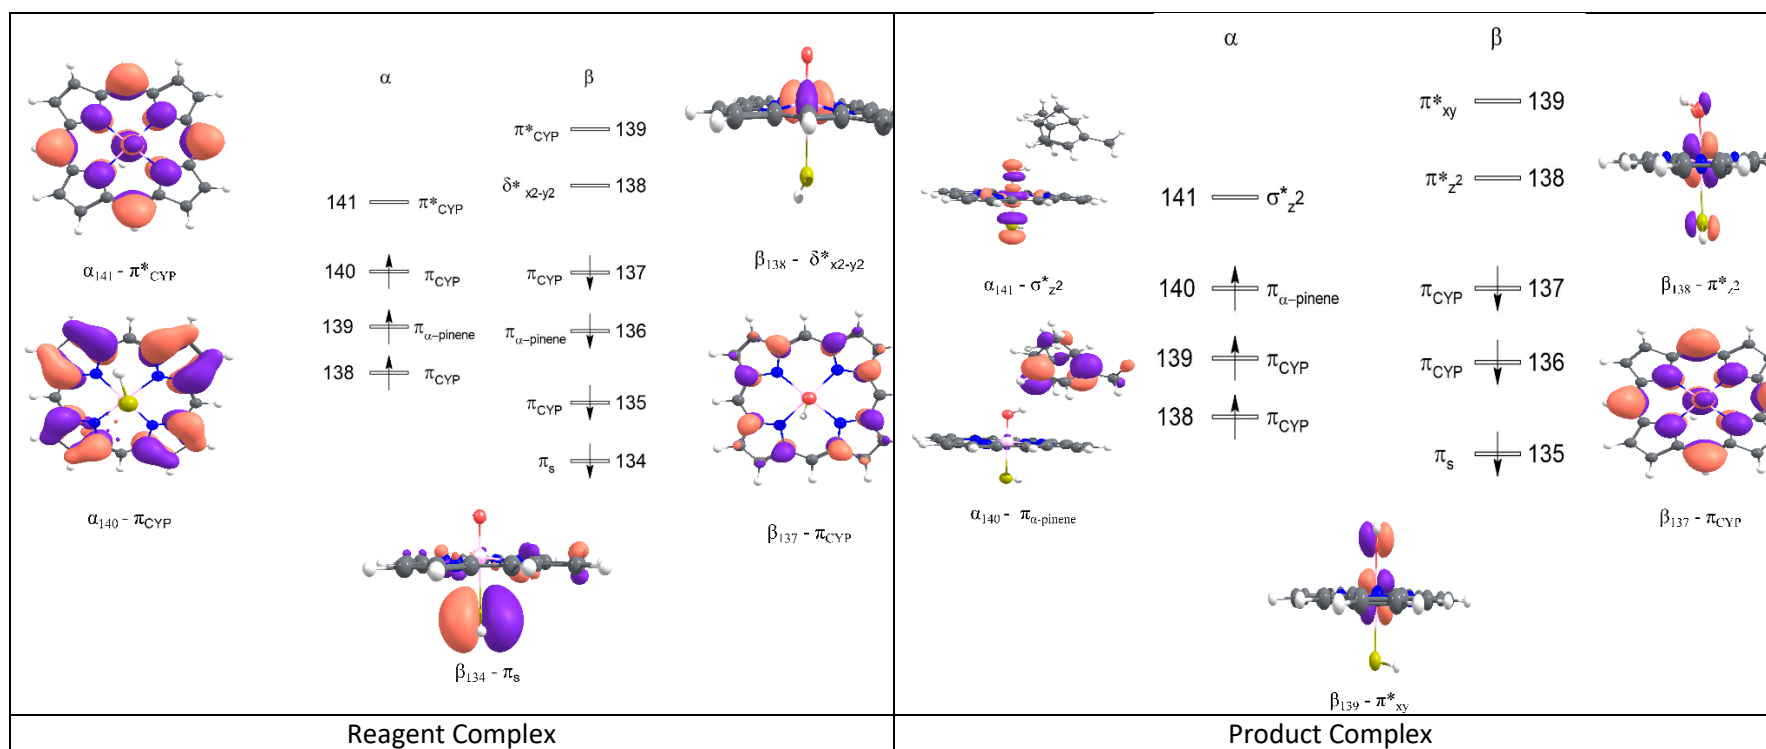

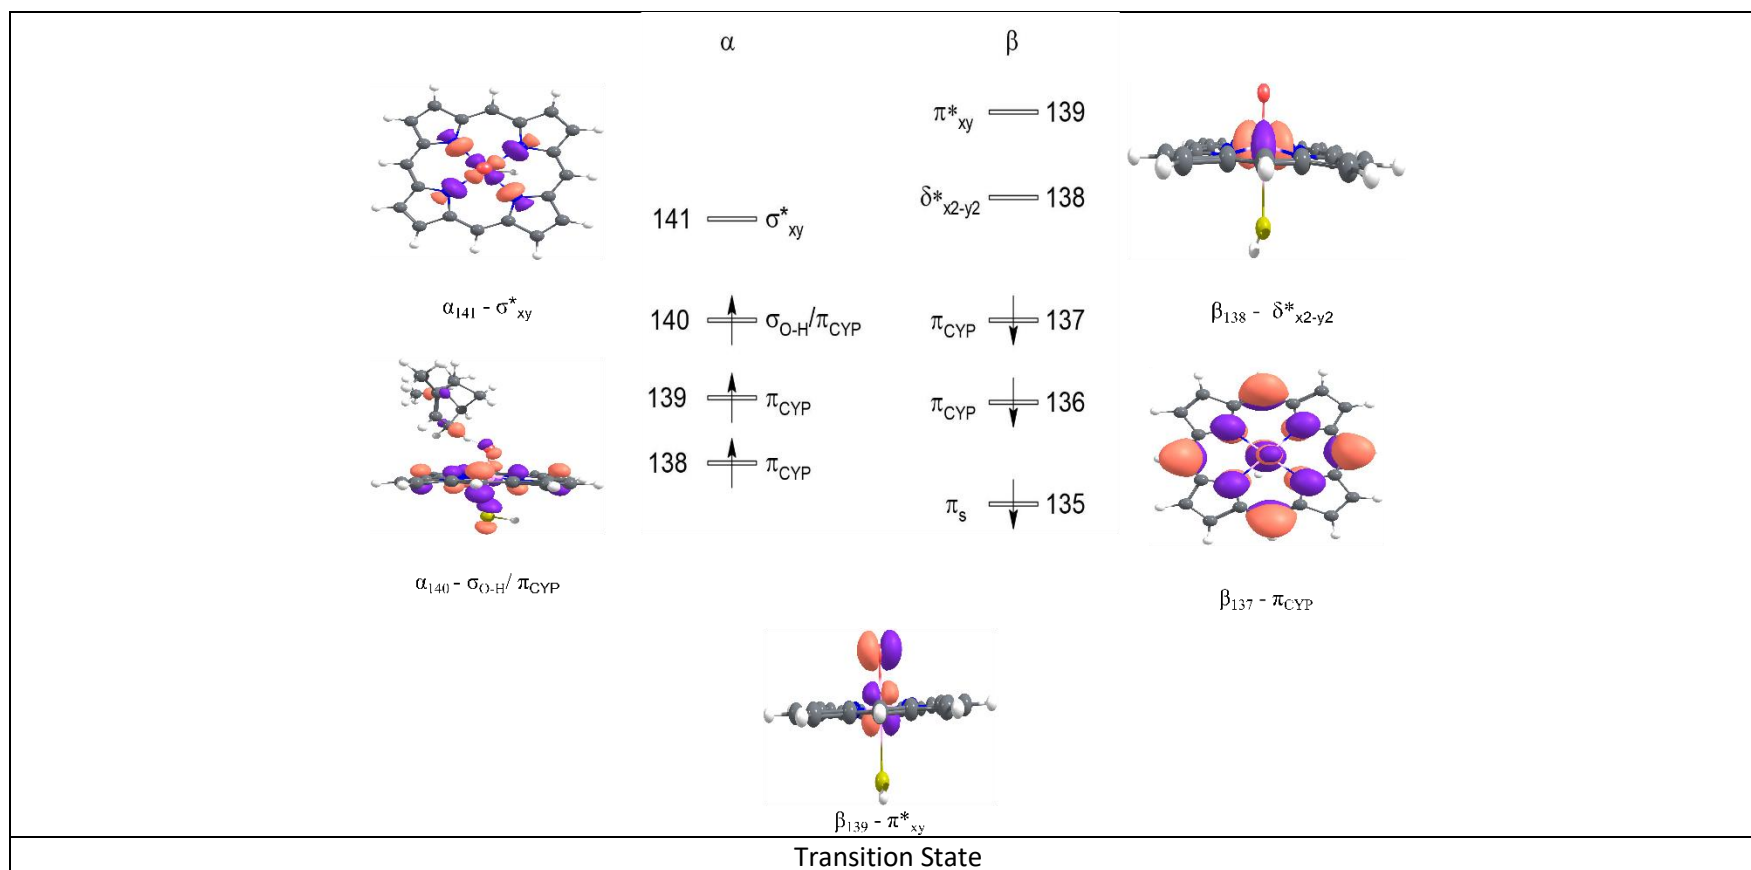

- Epsilon trans (doublet)

|     | Reactants |        |                     |                          | TS       |        |                     |                          | Products |        |                     |                          |
|-----|-----------|--------|---------------------|--------------------------|----------|--------|---------------------|--------------------------|----------|--------|---------------------|--------------------------|
|     | Mulliken  | NPA    | NBO spin Population | Mulliken spin Population | Mulliken | NPA    | NBO spin Population | Mulliken spin Population | Mulliken | NPA    | NBO spin Population | Mulliken spin Population |
| CYP |           |        |                     |                          |          |        |                     |                          |          |        |                     |                          |
| Fe  | 0.451     | 25.696 | 1.194               | 1.294                    | 0.433    | 25.641 | 1.452               | 1.545                    | 0.343    | 25.623 | 0.969               | 1.000                    |

|                         |        |        |        |        |        |        |        |        |        |        |        |        |
|-------------------------|--------|--------|--------|--------|--------|--------|--------|--------|--------|--------|--------|--------|
| N1                      | -0.517 | 7.395  | -0.137 | -0.143 | -0.539 | 7.427  | -0.044 | -0.047 | -0.523 | 7.454  | -0.015 | -0.017 |
| N2                      | -0.512 | 7.393  | -0.141 | -0.148 | -0.511 | 7.419  | -0.065 | -0.068 | -0.516 | 7.441  | -0.015 | -0.016 |
| N4                      | -0.516 | 7.394  | -0.132 | -0.139 | -0.531 | 7.426  | -0.048 | -0.051 | -0.515 | 7.440  | -0.015 | -0.015 |
| N3                      | -0.513 | 7.393  | -0.131 | -0.138 | -0.543 | 7.426  | -0.052 | -0.054 | -0.524 | 7.454  | -0.015 | -0.017 |
| S                       | -0.376 | 16.478 | -0.252 | -0.266 | -0.328 | 16.443 | -0.131 | -0.143 | -0.466 | 16.574 | 0.005  | -0.003 |
| O                       | -0.467 | 8.306  | 0.893  | 0.820  | -0.551 | 8.415  | 0.367  | 0.312  | -0.737 | 8.819  | 0.084  | 0.072  |
| Alpha-pinene            |        |        |        |        |        |        |        |        |        |        |        |        |
| C - $\epsilon$          | -0.314 | 6.489  | 0.001  | 0.002  | -0.361 | 6.439  | -0.137 | -0.140 | 0.013  | 5.928  | 0.000  | 0.000  |
| C - $\zeta$             | -0.130 | 6.236  | 0.000  | 0.000  | -0.122 | 6.242  | 0.001  | 0.005  | -0.191 | 6.308  | 0.000  | 0.000  |
| C - $\eta$              | 0.142  | 6.044  | 0.000  | 0.000  | 0.134  | 6.022  | -0.037 | -0.043 | 0.117  | 5.974  | 0.000  | 0.000  |
| C - $\alpha$            | -0.192 | 6.262  | 0.000  | 0.000  | -0.196 | 6.273  | 0.004  | 0.013  | -0.211 | 6.299  | 0.000  | 0.000  |
| C - $\theta$            | -0.285 | 6.441  | 0.000  | 0.000  | -0.291 | 6.433  | -0.016 | -0.017 | -0.314 | 6.399  | 0.001  | 0.001  |
| H2 - $\theta$           | 0.135  | 0.771  | 0.000  | 0.000  | 0.158  | 0.762  | 0.000  | 0.001  | 0.180  | 0.749  | 0.000  | 0.000  |
| H2 - $\theta$           | 0.140  | 0.765  | 0.000  | 0.000  | 0.158  | 0.755  | 0.001  | 0.000  | 0.232  | 0.718  | 0.000  | 0.001  |
| H2 - $\theta (\bar{x})$ | 0.137  | 0.768  | 0.000  | 0.000  | 0.105  | 0.505  | 0.000  | 0.000  | 0.206  | 0.733  | 0.000  | 0.000  |
| C - $\beta$             | 0.220  | 6.024  | 0.000  | 0.000  | 0.231  | 5.924  | -0.189 | -0.211 | 0.278  | 5.710  | 0.000  | 0.000  |
| C - $\delta$            | -0.220 | 6.241  | 0.000  | 0.000  | -0.163 | 6.198  | -0.023 | -0.009 | -0.165 | 6.320  | 0.000  | 0.000  |
| H - $\delta$            | 0.118  | 0.773  | 0.000  | 0.000  | 0.160  | 0.753  | 0.001  | 0.001  | 0.205  | 0.719  | 0.000  | 0.000  |
| C - $\gamma$            | -0.532 | 6.686  | 0.000  | 0.000  | -0.534 | 6.701  | 0.006  | 0.015  | -0.543 | 6.728  | 0.000  | 0.000  |
| H3 - $\gamma$           | 0.154  | 0.763  | 0.000  | 0.000  | 0.172  | 0.753  | -0.009 | 0.000  | 0.205  | 0.732  | 0.000  | 0.000  |
| H3 - $\gamma$           | 0.156  | 0.762  | 0.000  | 0.000  | 0.181  | 0.743  | -0.011 | -0.014 | 0.228  | 0.707  | 0.000  | 0.000  |
| H3 - $\gamma$           | 0.157  | 0.761  | 0.000  | 0.000  | 0.180  | 0.744  | 0.000  | -0.010 | 0.230  | 0.704  | 0.000  | 0.000  |
| H3 - $\gamma (\bar{x})$ | 0.156  | 0.762  | 0.000  | 0.000  | 0.178  | 0.747  | -0.007 | -0.008 | 0.221  | 0.714  | 0.000  | 0.000  |
| H - $\alpha$            | 0.111  | 0.758  | 0.000  | 0.000  | 0.135  | 0.745  | 0.000  | 0.000  | 0.181  | 0.721  | 0.000  | 0.000  |
| C - I                   | -0.472 | 6.669  | 0.000  | 0.000  | -0.473 | 6.673  | 0.001  | 0.003  | -0.512 | 6.694  | 0.000  | 0.000  |
| H3 - I                  | 0.141  | 0.769  | 0.000  | 0.000  | 0.152  | 0.762  | 0.000  | -0.002 | 0.167  | 0.752  | 0.000  | 0.000  |
| H3 - I                  | 0.142  | 0.769  | 0.000  | 0.000  | 0.153  | 0.761  | 0.000  | -0.002 | 0.170  | 0.751  | 0.000  | 0.000  |
| H3 - I                  | 0.146  | 0.770  | 0.000  | 0.000  | 0.154  | 0.766  | 0.001  | 0.000  | 0.214  | 0.738  | 0.000  | -0.001 |
| H3 - I ( $\bar{x}$ )    | 0.143  | 0.770  | 0.000  | 0.000  | 0.153  | 0.763  | 0.000  | -0.002 | 0.184  | 0.747  | 0.000  | 0.000  |
| C - K                   | -0.471 | 6.678  | 0.000  | 0.000  | -0.473 | 6.681  | 0.001  | 0.002  | -0.475 | 6.691  | 0.000  | 0.000  |



|                         |       |       |       |        |       |       |        |        |       |       |        |        |
|-------------------------|-------|-------|-------|--------|-------|-------|--------|--------|-------|-------|--------|--------|
| H3 - K                  | 0.138 | 0.770 | 0.000 | 0.000  | 0.150 | 0.762 | 0.002  | 0.000  | 0.173 | 0.747 | 0.000  | 0.000  |
| H3 - K                  | 0.137 | 0.770 | 0.000 | 0.000  | 0.149 | 0.763 | 0.000  | -0.001 | 0.172 | 0.748 | 0.000  | 0.000  |
| H3 - K                  | 0.148 | 0.763 | 0.000 | 0.000  | 0.153 | 0.763 | -0.002 | 0.000  | 0.159 | 0.760 | 0.000  | 0.000  |
| H3 - K ( $\bar{x}^-$ )  | 0.141 | 0.768 | 0.000 | 0.000  | 0.151 | 0.763 | 0.000  | 0.000  | 0.168 | 0.752 | 0.000  | 0.000  |
| H - $\zeta$             | 0.116 | 0.761 | 0.000 | 0.000  | 0.143 | 0.747 | 0.000  | 0.000  | 0.187 | 0.718 | 0.000  | 0.000  |
| H cis - $\varepsilon$   | 0.172 | 0.749 | 0.000 | -0.001 | 0.188 | 0.726 | -0.007 | -0.007 | 0.228 | 0.724 | 0.000  | 0.000  |
| H trans - $\varepsilon$ | 0.142 | 0.760 | 0.001 | 0.000  | 0.330 | 0.650 | -0.020 | -0.024 | 0.391 | 0.537 | -0.002 | -0.004 |

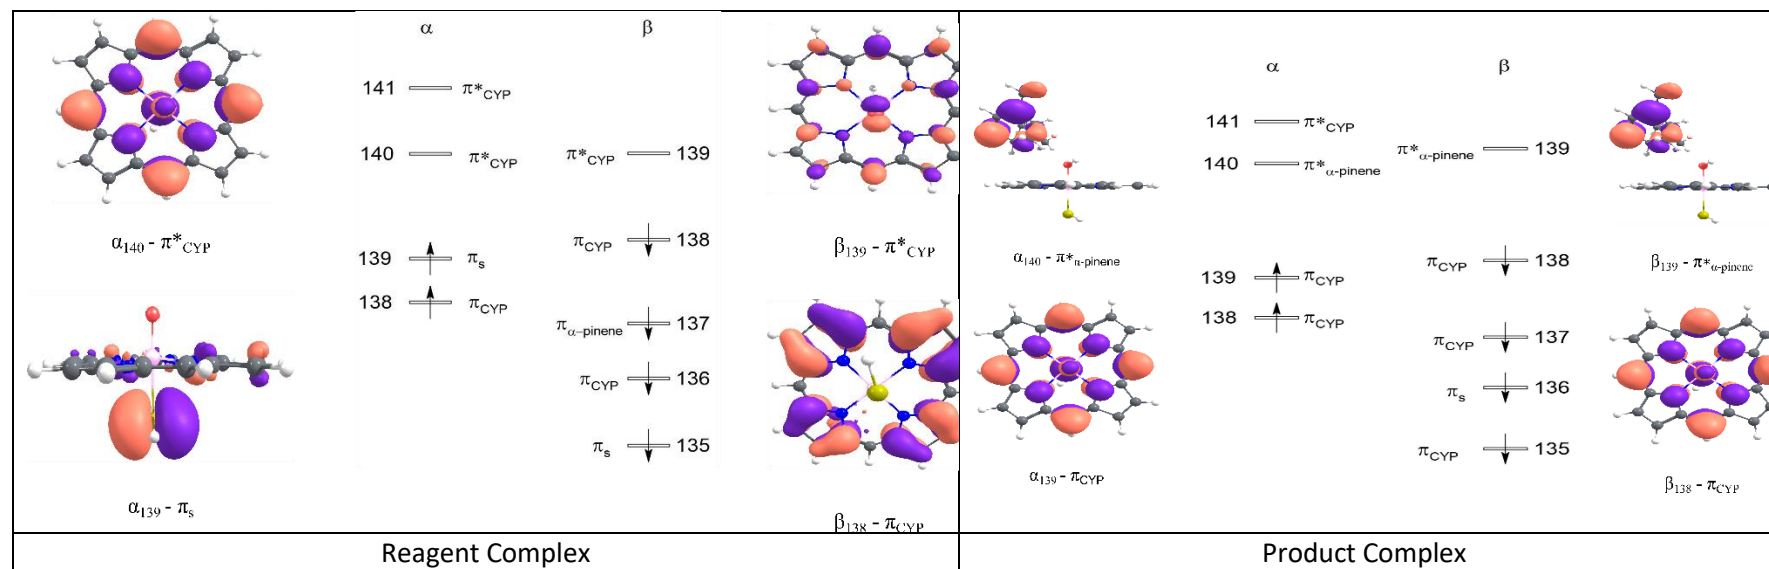



- Epsilon trans (quartet)

|     | Reactants |         |                     |                          | TS       |         |                     |                          | Products |         |                     |                          |
|-----|-----------|---------|---------------------|--------------------------|----------|---------|---------------------|--------------------------|----------|---------|---------------------|--------------------------|
|     | Mulliken  | NPA     | NBO spin Population | Mulliken spin Population | Mulliken | NPA     | NBO spin Population | Mulliken spin Population | Mulliken | NPA     | NBO spin Population | Mulliken spin Population |
| CYP |           |         |                     |                          |          |         |                     |                          |          |         |                     |                          |
| Fe  | 0.6197    | 25.2538 | 3.0360              | 3.2058                   | 0.5178   | 25.4718 | 1.8600              | 1.9213                   | 0.4340   | 25.5623 | 1.8350              | 1.8956                   |

|                         |         |         |         |         |         |         |         |         |         |         |         |         |
|-------------------------|---------|---------|---------|---------|---------|---------|---------|---------|---------|---------|---------|---------|
| N1                      | -0.5723 | 7.4883  | -0.0380 | -0.0694 | -0.5557 | 7.4422  | -0.0210 | -0.0239 | -0.5665 | 7.4400  | -0.0250 | -0.0269 |
| N2                      | -0.5506 | 7.4766  | -0.0470 | -0.0785 | -0.5594 | 7.4390  | 0.0300  | -0.0292 | -0.5518 | 7.4294  | -0.0310 | -0.0325 |
| N4                      | -0.5699 | 7.4864  | -0.0310 | -0.0632 | -0.5590 | 7.4371  | -0.0260 | -0.0265 | -0.5651 | 7.4422  | -0.0360 | -0.0304 |
| N3                      | -0.5515 | 7.4778  | -0.0380 | -0.0697 | -0.5587 | 7.4433  | -0.0230 | -0.0251 | -0.5659 | 7.4592  | -0.0390 | -0.0401 |
| S                       | -0.3234 | 16.4464 | -0.3250 | -0.3247 | -0.3331 | 16.4602 | -0.0370 | -0.0447 | -0.1649 | 16.2713 | 0.0070  | -0.0056 |
| O                       | -0.4932 | 8.3935  | 0.6690  | 0.6691  | -0.5684 | 8.4811  | 0.7100  | 0.6770  | -0.6962 | 8.7065  | 0.2370  | 0.2075  |
| Alpha-pinene            |         |         |         |         |         |         |         |         |         |         |         |         |
| C - $\epsilon$          | -0.3131 | 6.4893  | 0.0010  | 0.0010  | -0.3408 | 6.3902  | 0.3560  | 0.3896  | -0.1282 | 6.1944  | 0.5780  | 0.6438  |
| C - $\zeta$             | -0.1304 | 6.2364  | 0.0000  | 0.0000  | -0.1238 | 6.2506  | -0.0120 | -0.0200 | -0.1867 | 6.2853  | -0.0330 | -0.0549 |
| C - $\eta$              | 0.1422  | 6.0439  | 0.0000  | 0.0000  | 0.1376  | 6.0255  | 0.0520  | 0.0602  | 0.1439  | 6.0291  | 0.065   | 0.0768  |
| C - $\alpha$            | -0.1915 | 6.2624  | 0.0000  | 0.0000  | -0.1941 | 6.2707  | -0.0100 | -0.0198 | -0.1961 | 6.2737  | -0.030  | -0.0527 |
| C - $\theta$            | -0.2846 | 6.4411  | 0.0000  | 0.0000  | -0.2902 | 6.4344  | 0.0190  | 0.0199  | -0.2759 | 6.4275  | 0.0610  | 0.0652  |
| H2 - $\theta$           | 0.1349  | 0.7706  | 0.0000  | 0.0000  | 0.1544  | 0.7633  | -0.0010 | -0.0011 | 0.1326  | 0.7681  | -0.0020 | -0.0034 |
| H2 - $\theta$           | 0.1397  | 0.7654  | 0.0000  | 0.0000  | 0.1528  | 0.7578  | 0.0000  | -0.0005 | 0.1441  | 0.7648  | -0.0020 | -0.0031 |
| H2 - $\theta (\bar{x})$ | 0.1373  | 0.7680  | 0.0000  | 0.0000  | 0.1536  | 0.7605  | -0.0005 | -0.0008 | 0.1383  | 0.7665  | -0.0020 | -0.0032 |
| C - $\beta$             | 0.2195  | 6.0240  | 0.0000  | 0.0002  | 0.2270  | 5.9478  | 0.2300  | 0.2615  | 0.1788  | 5.9785  | 0.5380  | 0.6048  |
| C - $\delta$            | -0.2205 | 6.2415  | 0.0000  | -0.0001 | -0.1797 | 6.2362  | -0.0650 | -0.0940 | -0.1905 | 6.3065  | -0.1870 | -0.2570 |
| H - $\delta$            | 0.1177  | 0.7727  | 0.0000  | 0.0000  | 0.1490  | 0.7570  | 0.0020  | 0.0032  | 0.1229  | 0.7633  | 0.0050  | 0.0093  |
| C - $\gamma$            | -0.5316 | 6.6862  | 0.0000  | 0.0000  | -0.5338 | 6.6970  | -0.0090 | -0.0196 | -0.5321 | 6.6982  | -0.0280 | -0.0523 |
| H3 - $\gamma$           | 0.1541  | 0.7627  | 0.0000  | 0.0000  | 0.1663  | 0.7560  | 0.0000  | 0.0003  | 0.1566  | 0.7612  | 0.0010  | 0.0011  |
| H3 - $\gamma$           | 0.1562  | 0.7618  | 0.0000  | 0.0000  | 0.1736  | 0.7485  | 0.0130  | 0.0152  | 0.1587  | 0.7602  | 0.0260  | 0.0292  |
| H3 - $\gamma$           | 0.1569  | 0.7610  | 0.0000  | 0.0000  | 0.1730  | 0.7494  | 0.0090  | 0.0105  | 0.1595  | 0.7594  | 0.0250  | 0.0284  |
| H3 - $\gamma (\bar{x})$ | 0.1557  | 0.7618  | 0.0000  | 0.0000  | 0.1710  | 0.7513  | 0.0073  | 0.0087  | 0.1582  | 0.7602  | 0.0173  | 0.0196  |
| H - $\alpha$            | 0.1108  | 0.7582  | 0.0000  | 0.0000  | 0.1281  | 0.7487  | 0.0000  | 0.0002  | 0.1148  | 0.7561  | -0.0300 | 0.0009  |
| C - I                   | -0.4719 | 6.6686  | 0.0000  | 0.0000  | -0.4729 | 6.6717  | -0.0020 | -0.0037 | -0.4770 | 6.6714  | -0.0020 | -0.0060 |
| H3 - I                  | 0.1414  | 0.7692  | 0.0000  | 0.0000  | 0.1500  | 0.7632  | 0.0030  | 0.0036  | 0.1436  | 0.7674  | 0.0000  | 0.0031  |
| H3 - I                  | 0.1415  | 0.7690  | 0.0000  | 0.0000  | 0.1503  | 0.7632  | 0.0020  | 0.0022  | 0.1503  | 0.7674  | 0.0000  | 0.0030  |
| H3 - I                  | 0.1456  | 0.7704  | 0.0000  | 0.0000  | 0.1518  | 0.7670  | 0.0000  | 0.0000  | 0.1483  | 0.7694  | 0.0000  | 0.0001  |
| H3 - I ( $\bar{x}$ )    | 0.1428  | 0.7695  | 0.0000  | 0.0000  | 0.1507  | 0.7645  | 0.0025  | 0.0019  | 0.1474  | 0.7681  | 0.0000  | 0.0021  |
| C - K                   | -0.4713 | 6.6775  | 0.0000  | 0.0000  | -0.4721 | 6.6796  | -0.0020 | -0.0033 | -0.4732 | 6.6769  | -0.0040 | -0.0032 |

|                      |        |        |        |         |        |        |         |         |        |        |         |         |
|----------------------|--------|--------|--------|---------|--------|--------|---------|---------|--------|--------|---------|---------|
| H3 - K               | 0.1381 | 0.7701 | 0.0000 | 0.0000  | 0.1467 | 0.7646 | 0.0000  | 0.0002  | 0.1413 | 0.7694 | 0.0030  | 0.0000  |
| H3 - K               | 0.1370 | 0.7701 | 0.0000 | 0.0000  | 0.1455 | 0.7648 | 0.0010  | 0.0004  | 0.1361 | 0.7711 | 0.0030  | -0.0001 |
| H3 - K               | 0.1479 | 0.7635 | 0.0000 | 0.0000  | 0.1516 | 0.7629 | 0.0000  | -0.0004 | 0.1480 | 0.7618 | 0.0000  | -0.0010 |
| H3 - K ( $\bar{x}$ ) | 0.1410 | 0.7679 | 0.0000 | 0.0000  | 0.1479 | 0.7641 | 0.0003  | 0.0000  | 0.1418 | 0.7675 | 0.0020  | -0.0004 |
| H - $\zeta$          | 0.1169 | 0.7607 | 0.0000 | 0.0000  | 0.1385 | 0.7491 | 0.0020  | 0.0017  | 0.1343 | 0.7548 | 0.0010  | 0.0011  |
| H cis - $\epsilon$   | 0.1712 | 0.7488 | 0.0000 | -0.0001 | 0.1842 | 0.7345 | -0.0010 | -0.0025 | 0.1347 | 0.7714 | -0.0180 | -0.0327 |
| H trans - $\epsilon$ | 0.1421 | 0.7601 | 0.0000 | 0.0000  | 0.3589 | 0.6276 | -0.0160 | -0.0332 | 0.4369 | 0.5050 | 0.0010  | 0.0034  |

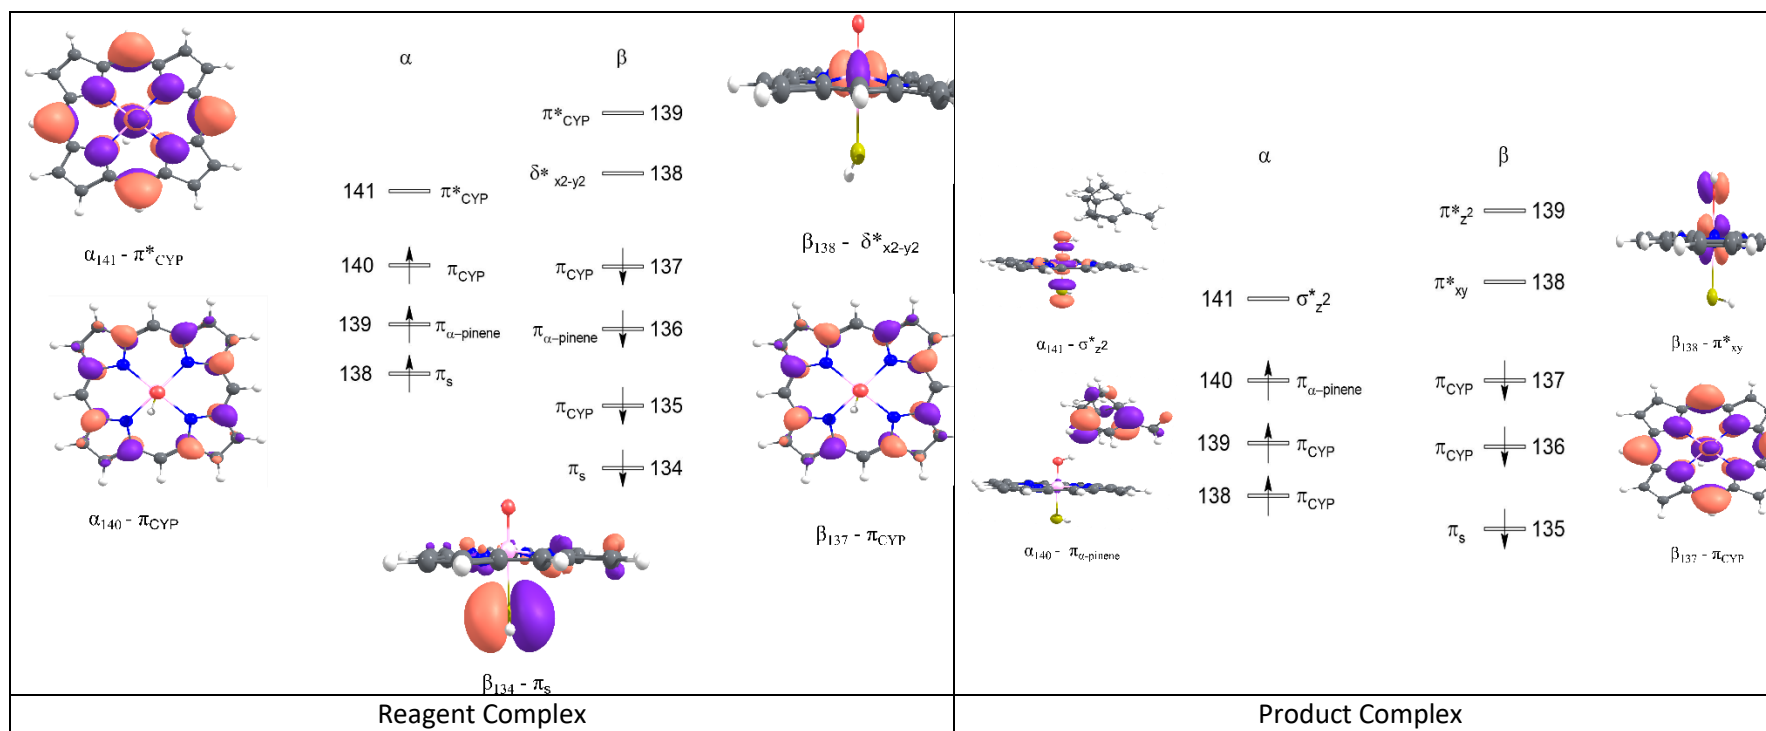

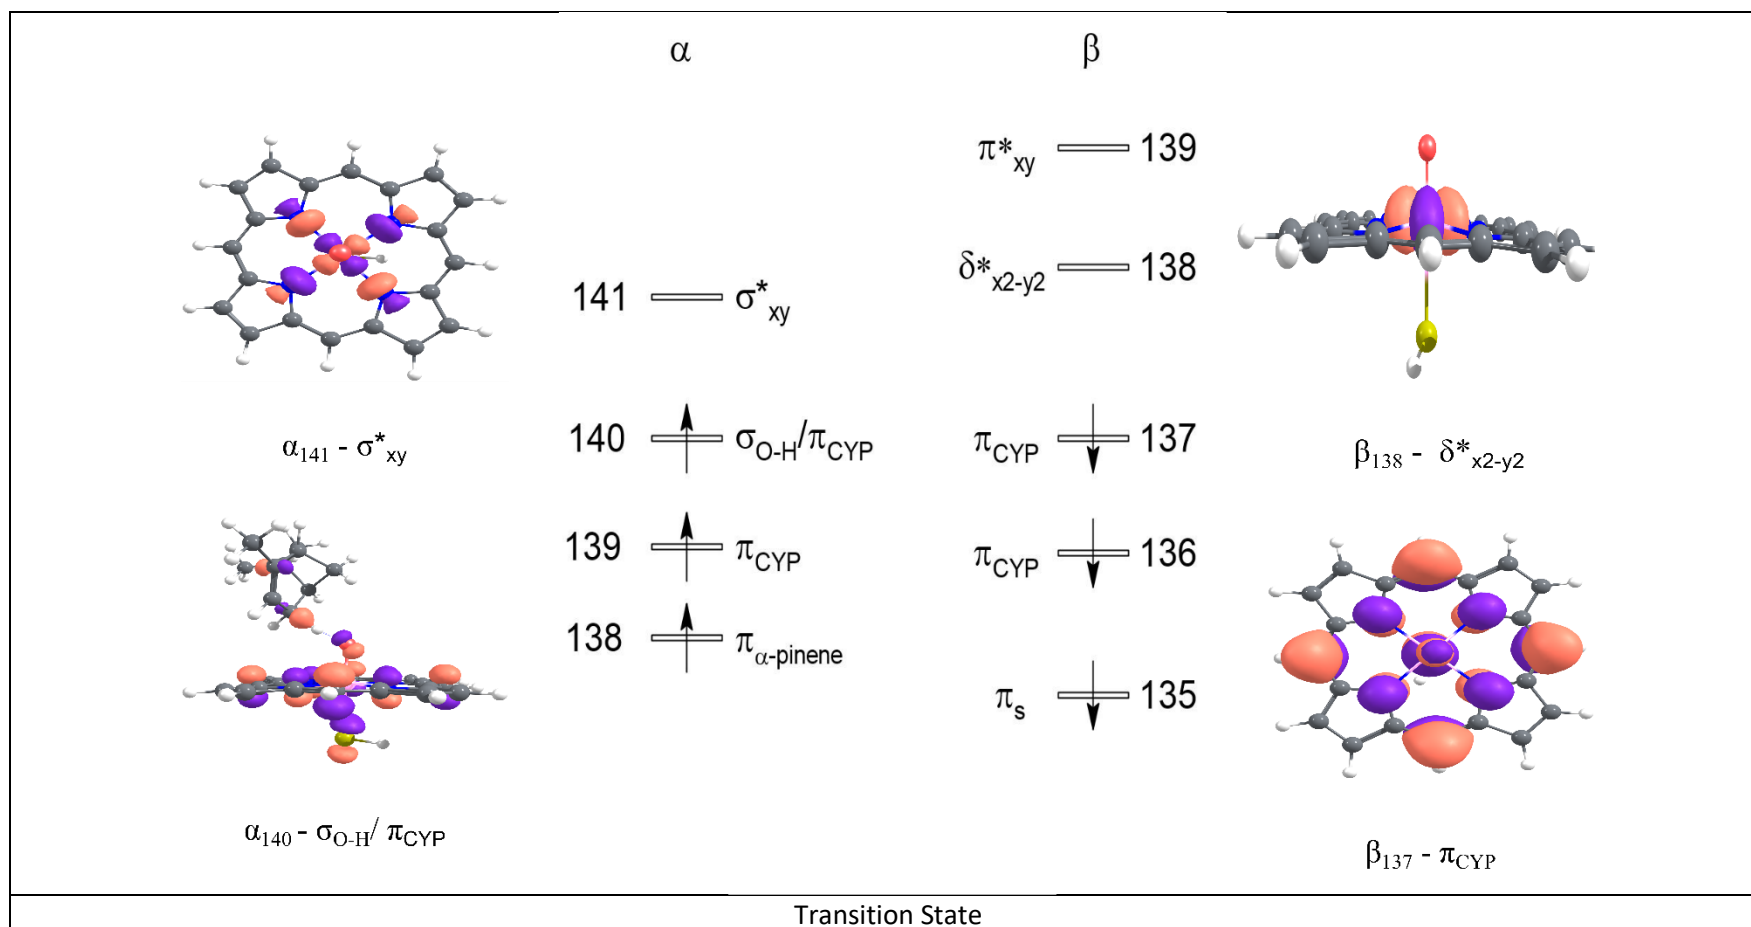

**Table S13: Coordinates Beta-Pinene**

Alpha site – Doublet state

Coordinate 1

|    |             |             |             |
|----|-------------|-------------|-------------|
| Fe | 1.45571400  | 0.01158500  | 0.17518400  |
| N  | 1.90242500  | 1.91962000  | -0.30792600 |
| C  | 2.75612700  | 2.34091300  | -1.29634500 |
| C  | 2.73440400  | 3.77923900  | -1.40491400 |
| C  | 1.84654300  | 4.22696200  | -0.47475400 |
| C  | 1.33157600  | 3.06016600  | 0.19916600  |
| C  | 0.39212600  | 3.09372700  | 1.22481200  |
| C  | -0.10145900 | 1.98604700  | 1.90657100  |
| C  | -1.05138700 | 2.04949900  | 2.99103400  |
| C  | -1.26799700 | 0.76671200  | 3.39406800  |
| C  | -0.45087000 | -0.07377100 | 2.55229200  |
| N  | 0.25742000  | 0.68600800  | 1.65587200  |
| C  | -0.39276700 | -1.46019200 | 2.64503400  |
| C  | 0.39010400  | -2.29568400 | 1.85447500  |
| C  | 0.43390100  | -3.73172000 | 1.98321900  |
| C  | 1.30211500  | -4.18133900 | 1.03535700  |
| C  | 1.78432000  | -3.01725400 | 0.33307700  |
| N  | 1.22224700  | -1.87680500 | 0.84759900  |
| C  | 2.69794000  | -3.05294800 | -0.71595300 |
| C  | 3.19388500  | -1.94457700 | -1.39512400 |
| C  | 4.16326200  | -2.00693700 | -2.46231000 |
| C  | 4.39922100  | -0.72281900 | -2.84831600 |
| C  | 3.57231900  | 0.11633900  | -2.01490600 |
| C  | 3.53049800  | 1.50462200  | -2.09387400 |
| H  | 4.15975600  | 1.97716900  | -2.84144500 |

|   |             |             |             |
|---|-------------|-------------|-------------|
| N | 2.84644700  | -0.64428000 | -1.13493100 |
| H | 5.06684200  | -0.35847500 | -3.61797600 |
| H | 4.59661200  | -2.92062300 | -2.84722000 |
| H | 3.06155700  | -4.02800000 | -1.02448400 |
| H | 1.60164000  | -5.19836600 | 0.81916600  |
| H | -0.13041000 | -4.30171900 | 2.70947300  |
| H | -1.01010900 | -1.93191400 | 3.40296600  |
| H | -1.91094500 | 0.40498600  | 4.18563500  |
| H | -1.47870800 | 2.96343400  | 3.38195600  |
| H | 0.02170200  | 4.06834000  | 1.52647100  |
| H | 1.55649200  | 5.24489700  | -0.25011000 |
| H | 3.32688400  | 4.35193900  | -2.10617300 |
| O | 0.23481000  | -0.09143900 | -0.91030400 |
| S | 3.35180400  | 0.16476500  | 1.87892800  |
| H | 3.20019800  | 1.46428500  | 2.21678600  |
| C | -6.33194400 | -0.74861600 | -0.80700900 |
| C | -5.55464300 | 0.30665800  | -0.00092100 |
| C | -4.37526800 | -0.38387500 | 0.74022300  |
| C | -3.57367500 | -0.22365800 | -0.58920200 |
| C | -4.48745900 | 1.03143000  | -0.89566800 |
| C | -4.82553500 | 1.35056800  | -2.35440800 |
| H | -5.60334300 | 2.12360100  | -2.40853400 |
| H | -3.93956300 | 1.73942200  | -2.87314800 |
| H | -5.17537100 | 0.48186900  | -2.91788400 |
| C | -3.94527800 | 2.30904800  | -0.23531700 |
| H | -4.69882000 | 3.10648100  | -0.27450400 |
| H | -3.66657500 | 2.16891400  | 0.81331800  |
| H | -3.05546900 | 2.66774600  | -0.76861700 |
| C | -3.93247500 | -1.34957400 | -1.52723800 |
| C | -5.37608300 | -1.82809200 | -1.39574900 |
| H | -5.74681300 | -2.20262800 | -2.35628400 |

|   |             |             |             |
|---|-------------|-------------|-------------|
| H | -5.37698300 | -2.69307000 | -0.71900200 |
| C | -3.05989900 | -1.88618400 | -2.38795500 |
| H | -3.34609200 | -2.67866800 | -3.07700000 |
| H | -2.02513000 | -1.55223600 | -2.42617200 |
| H | -2.49214500 | -0.05595600 | -0.54253100 |
| H | -4.53673100 | -1.40056700 | 1.11447500  |
| H | -3.96131500 | 0.22096900  | 1.54924000  |
| H | -6.23205000 | 0.94617800  | 0.57853900  |
| H | -6.90112000 | -0.25800700 | -1.60544800 |
| H | -7.06926200 | -1.23588700 | -0.15719100 |

Coordinate II – TS (-1655.11)

|    |             |             |             |
|----|-------------|-------------|-------------|
| Fe | -1.08984500 | 0.02570200  | 0.34743800  |
| N  | -0.64993500 | -1.81826200 | 1.01892300  |
| C  | -1.12433600 | -3.00239600 | 0.50720900  |
| C  | -0.56675600 | -4.11945600 | 1.23267200  |
| C  | 0.24515300  | -3.59772800 | 2.19419000  |
| C  | 0.18664800  | -2.16290400 | 2.04879000  |
| C  | 0.88279700  | -1.25425600 | 2.84193400  |
| C  | 0.84574400  | 0.12852100  | 2.69931700  |
| C  | 1.56915400  | 1.05817000  | 3.53349000  |
| C  | 1.27267900  | 2.30549200  | 3.07540400  |
| C  | 0.36203000  | 2.13619100  | 1.96750600  |
| N  | 0.12051300  | 0.80101400  | 1.74405500  |
| C  | -0.20599400 | 3.18694500  | 1.25503700  |
| C  | -1.14585600 | 3.06916100  | 0.23369900  |
| C  | -1.74312000 | 4.18556800  | -0.46195900 |
| C  | -2.61620100 | 3.65828100  | -1.36471100 |
| C  | -2.54352600 | 2.22270300  | -1.21993600 |
| N  | -1.64640600 | 1.88653400  | -0.23909200 |
| C  | -3.27500400 | 1.31607100  | -1.98211600 |



|   |             |             |             |
|---|-------------|-------------|-------------|
| C | -3.19720100 | -0.07024000 | -1.88706300 |
| C | -3.93910500 | -0.99604900 | -2.71328300 |
| C | -3.57795700 | -2.24701700 | -2.31555300 |
| C | -2.62155600 | -2.07960000 | -1.24388900 |
| C | -2.02444500 | -3.12632700 | -0.54604100 |
| H | -2.29791800 | -4.13492100 | -0.84088900 |
| N | -2.40339200 | -0.75025100 | -1.00099500 |
| H | -3.91788200 | -3.20170800 | -2.69570900 |
| H | -4.63641000 | -0.70807600 | -3.48936400 |
| H | -3.95174600 | 1.72615200  | -2.72548000 |
| H | -3.25295000 | 4.17518500  | -2.07096800 |
| H | -1.51401700 | 5.22585600  | -0.27023100 |
| H | 0.09239500  | 4.19178600  | 1.53781600  |
| H | 1.61984600  | 3.26144000  | 3.44565400  |
| H | 2.21181500  | 0.77531100  | 4.35708100  |
| H | 1.50413300  | -1.65770400 | 3.63534900  |
| H | 0.83467500  | -4.11887400 | 2.93725200  |
| H | -0.78310000 | -5.15894800 | 1.02256300  |
| O | 0.07385700  | -0.03434300 | -0.96990600 |
| S | -2.96511200 | 0.03854100  | 1.91399000  |
| H | -2.26354200 | -0.14671900 | 3.05461800  |
| C | 5.31383900  | 0.21360500  | -1.03746000 |
| C | 4.39691900  | -0.97984400 | -0.71731900 |
| C | 3.38211000  | -0.56697300 | 0.39439500  |
| C | 2.57131200  | 0.00152500  | -0.78136600 |
| C | 3.18550300  | -1.08571800 | -1.73060200 |
| C | 3.39802100  | -0.73385900 | -3.20177900 |
| H | 4.02630400  | -1.49285100 | -3.68450900 |
| H | 2.43592200  | -0.71866300 | -3.72878800 |
| H | 3.86694200  | 0.24127800  | -3.35075100 |
| C | 2.49414200  | -2.45455700 | -1.64244800 |

|   |            |             |             |
|---|------------|-------------|-------------|
| H | 3.11889500 | -3.21725800 | -2.12335900 |
| H | 2.30517900 | -2.77885600 | -0.61558500 |
| H | 1.53229200 | -2.42723600 | -2.16620900 |
| C | 3.03525600 | 1.37368100  | -1.16347800 |
| C | 4.53727900 | 1.55542600  | -0.92141200 |
| H | 4.93846200 | 2.31219200  | -1.60366200 |
| H | 4.67371800 | 1.95332400  | 0.09228300  |
| C | 2.25314000 | 2.32166100  | -1.69179500 |
| H | 2.65966500 | 3.28311100  | -1.99757200 |
| H | 1.18650900 | 2.16490100  | -1.81661000 |
| H | 3.71307900 | 0.13164300  | 1.16613400  |
| H | 2.91289600 | -1.42845800 | 0.87078200  |
| H | 4.95527300 | -1.91125700 | -0.55972500 |
| H | 5.73997000 | 0.09532900  | -2.04000200 |
| H | 6.15762600 | 0.21991700  | -0.33769400 |
| H | 1.26939900 | -0.03576200 | -0.72924100 |

#### Coordinate III

|    |             |             |            |
|----|-------------|-------------|------------|
| Fe | -1.23600300 | 0.04435300  | 0.30908100 |
| N  | -0.65529200 | -1.74535500 | 1.05959000 |
| C  | -1.02106900 | -2.97850600 | 0.57509600 |
| C  | -0.37642300 | -4.02360000 | 1.33477700 |
| C  | 0.38255400  | -3.41115800 | 2.28454500 |
| C  | 0.21110600  | -1.98993200 | 2.09863100 |
| C  | 0.85003400  | -1.00587700 | 2.84303000 |
| C  | 0.72778000  | 0.36632300  | 2.63860300 |
| C  | 1.41074700  | 1.37565900  | 3.41200200 |
| C  | 1.02396600  | 2.57967200  | 2.90723500 |
| C  | 0.10189400  | 2.30101500  | 1.83190000 |
| N  | -0.05950000 | 0.94860200  | 1.67778200 |
| C  | -0.55258600 | 3.27711700  | 1.08635000 |

|   |             |             |             |
|---|-------------|-------------|-------------|
| C | -1.48791000 | 3.05286900  | 0.08146200  |
| C | -2.16319500 | 4.09920200  | -0.65223100 |
| C | -3.00161100 | 3.47996600  | -1.52713400 |
| C | -2.82945000 | 2.05937600  | -1.32603100 |
| N | -1.91028100 | 1.82323000  | -0.34420100 |
| C | -3.50115300 | 1.07428600  | -2.04714800 |
| C | -3.32259700 | -0.29487600 | -1.90127700 |
| C | -3.98948300 | -1.30456700 | -2.69341400 |
| C | -3.52025700 | -2.50592400 | -2.26365100 |
| C | -2.57602900 | -2.22707300 | -1.20300600 |
| C | -1.89163300 | -3.20145300 | -0.48437300 |
| H | -2.07638200 | -4.23620800 | -0.75830100 |
| N | -2.47308800 | -0.87854400 | -0.99947000 |
| H | -3.78053900 | -3.49667900 | -2.61395200 |
| H | -4.71337600 | -1.10128200 | -3.47224700 |
| H | -4.20902200 | 1.40701400  | -2.80073200 |
| H | -3.67573700 | 3.92554300  | -2.24751000 |
| H | -2.00595200 | 5.15986400  | -0.50292900 |
| H | -0.32179800 | 4.31208500  | 1.32187400  |
| H | 1.31898100  | 3.57113700  | 3.22660000  |
| H | 2.08914400  | 1.17345500  | 4.23118100  |
| H | 1.50638700  | -1.33350300 | 3.64410400  |
| H | 1.00712600  | -3.86422700 | 3.04407400  |
| H | -0.50361000 | -5.08358900 | 1.15502400  |
| O | 0.05148100  | 0.01060000  | -0.95656500 |
| S | -3.08625200 | -0.21895300 | 1.86404700  |
| H | -2.37212500 | -0.36833200 | 3.00296700  |
| C | 5.67120100  | 0.25558100  | -1.16935400 |
| C | 4.80096900  | -0.91748300 | -0.66956400 |
| C | 3.93597100  | -0.42746000 | 0.53754900  |
| C | 3.02912700  | 0.07893500  | -0.57953800 |

|   |            |             |             |
|---|------------|-------------|-------------|
| C | 3.46285000 | -1.07375400 | -1.51652600 |
| C | 3.48060300 | -0.81793000 | -3.02159200 |
| H | 4.00077900 | -1.63239200 | -3.54166300 |
| H | 2.45245700 | -0.78038700 | -3.40005800 |
| H | 3.95911800 | 0.12520100  | -3.29436600 |
| C | 2.76177100 | -2.41589400 | -1.24830000 |
| H | 3.27790400 | -3.22323300 | -1.78306100 |
| H | 2.72824000 | -2.68534500 | -0.18915100 |
| H | 1.72871100 | -2.36823100 | -1.60879200 |
| C | 3.39870000 | 1.41881800  | -1.09053700 |
| C | 4.92072100 | 1.61478600  | -1.02829100 |
| H | 5.24436000 | 2.33139300  | -1.79108100 |
| H | 5.17873600 | 2.06100400  | -0.05894700 |
| C | 2.54013800 | 2.30479600  | -1.60703000 |
| H | 2.88514200 | 3.24986400  | -2.02160900 |
| H | 1.47291600 | 2.10376700  | -1.62028600 |
| H | 4.36709600 | 0.30899900  | 1.22021600  |
| H | 3.51216800 | -1.25144300 | 1.11450200  |
| H | 5.37895400 | -1.84245500 | -0.53127200 |
| H | 5.96283400 | 0.08073200  | -2.21119900 |
| H | 6.60081800 | 0.28880900  | -0.58828200 |
| H | 0.91765500 | -0.05932900 | -0.50244700 |

#### Coordinate V

|    |             |             |             |
|----|-------------|-------------|-------------|
| Fe | -1.12882000 | 0.03680500  | 0.37771900  |
| N  | -1.94098600 | -0.25740500 | -1.44811800 |
| C  | -2.36510200 | 0.69135300  | -2.35340800 |
| C  | -2.97964600 | 0.05679000  | -3.49261400 |
| C  | -2.93908900 | -1.28594300 | -3.26374600 |
| C  | -2.29822200 | -1.47391800 | -1.98493300 |
| C  | -2.08506200 | -2.71263300 | -1.39400800 |

|   |             |             |             |
|---|-------------|-------------|-------------|
| C | -1.47958100 | -2.92414700 | -0.16158000 |
| C | -1.25680100 | -4.22907500 | 0.41561600  |
| C | -0.63512500 | -4.03057800 | 1.61111000  |
| C | -0.47882400 | -2.60434000 | 1.76528900  |
| N | -0.99617700 | -1.94566800 | 0.67437500  |
| C | 0.10817900  | -1.99151000 | 2.86484800  |
| C | 0.25640300  | -0.61913200 | 3.01496600  |
| C | 0.85441000  | 0.01545400  | 4.16360100  |
| C | 0.79879200  | 1.35858400  | 3.94306900  |
| C | 0.16480700  | 1.54575800  | 2.65980800  |
| N | -0.14842000 | 0.32805000  | 2.10158100  |
| C | -0.08834200 | 2.78755400  | 2.09153900  |
| C | -0.70044900 | 2.99981500  | 0.86306300  |
| C | -0.94636300 | 4.30466900  | 0.29646200  |
| C | -1.54807300 | 4.10380700  | -0.90873000 |
| C | -1.67075000 | 2.67626800  | -1.07845200 |
| C | -2.23770900 | 2.06452500  | -2.18913800 |
| H | -2.61403500 | 2.70448300  | -2.98076000 |
| N | -1.14573400 | 2.01793900  | 0.01043000  |
| H | -1.88132700 | 4.83951400  | -1.62955300 |
| H | -0.68209400 | 5.24070600  | 0.77195200  |
| H | 0.21702800  | 3.66402600  | 2.65444800  |
| H | 1.14774200  | 2.16262300  | 4.57851200  |
| H | 1.25881200  | -0.51345700 | 5.01720300  |
| H | 0.47243200  | -2.62915800 | 3.66400800  |
| H | -0.30428100 | -4.76718400 | 2.33211800  |
| H | -1.54159400 | -5.16366800 | -0.05077900 |
| H | -2.41781300 | -3.58875100 | -1.94179100 |
| H | -3.30468600 | -2.08876600 | -3.89135800 |
| H | -3.38517200 | 0.58494300  | -4.34614000 |
| O | 0.82827700  | -0.11641700 | -0.84216000 |

|   |             |             |             |
|---|-------------|-------------|-------------|
| S | -3.16823700 | 0.14288900  | 1.37484000  |
| H | -2.90794600 | -0.65101200 | 2.43710900  |
| C | 5.05459500  | 0.17618600  | -0.48952800 |
| C | 4.08836200  | -1.00700900 | -0.33154700 |
| C | 2.87535800  | -0.58792500 | 0.55042900  |
| C | 2.25175600  | -0.03454600 | -0.75008600 |
| C | 3.09996100  | -1.11318600 | -1.54751300 |
| C | 3.59222500  | -0.76100900 | -2.95426100 |
| H | 4.31922400  | -1.50690800 | -3.29935700 |
| H | 2.75500900  | -0.76826300 | -3.66413100 |
| H | 4.06380600  | 0.22246500  | -3.01721900 |
| C | 2.41076400  | -2.48504600 | -1.60304200 |
| H | 3.11658000  | -3.23023300 | -1.99022900 |
| H | 2.05996400  | -2.83533800 | -0.62901100 |
| H | 1.54764300  | -2.46102100 | -2.27823900 |
| C | 2.82199400  | 1.34382400  | -1.03962100 |
| C | 4.26941500  | 1.51325500  | -0.58216200 |
| H | 4.78580800  | 2.23472900  | -1.22409400 |
| H | 4.24188800  | 1.96695600  | 0.41730400  |
| C | 2.13863100  | 2.32562900  | -1.63493000 |
| H | 2.60948300  | 3.28067300  | -1.85607000 |
| H | 1.09104600  | 2.23375500  | -1.90369300 |
| H | 0.53699800  | 0.14715600  | -1.73133400 |
| H | 3.04754200  | 0.11761600  | 1.36816700  |
| H | 2.31450200  | -1.44155200 | 0.92983100  |
| H | 4.61181400  | -1.92967900 | -0.05880000 |
| H | 5.67960500  | 0.02784900  | -1.37763200 |
| H | 5.73703000  | 0.21441700  | 0.36779800  |

Alpha site – Quartet state

Coordinate I

|    |             |             |             |
|----|-------------|-------------|-------------|
| Fe | 1.46165200  | 0.01802400  | 0.19463400  |
| N  | 1.85111000  | 2.01056800  | -0.23522400 |
| C  | 2.67895600  | 2.46206700  | -1.21949500 |
| C  | 2.59124900  | 3.92593900  | -1.28640800 |
| C  | 1.70214600  | 4.31031900  | -0.34060100 |
| C  | 1.23086900  | 3.08849200  | 0.32255700  |
| C  | 0.29686600  | 3.04296400  | 1.36629700  |
| C  | -0.17096500 | 1.89419700  | 2.01848400  |
| C  | -1.14367900 | 1.87914900  | 3.11852900  |
| C  | -1.31905500 | 0.58299300  | 3.46941400  |
| C  | -0.45733400 | -0.21686100 | 2.58932000  |
| N  | 0.21079200  | 0.61612400  | 1.74280100  |
| C  | -0.34423600 | -1.61298100 | 2.62167000  |
| C  | 0.46105800  | -2.41011100 | 1.79727300  |
| C  | 0.54414300  | -3.87435600 | 1.86056700  |
| C  | 1.41892100  | -4.26028700 | 0.90213900  |
| C  | 1.88668100  | -3.03866000 | 0.23595000  |
| N  | 1.28660400  | -1.95883900 | 0.81084200  |
| C  | 2.80864200  | -2.99442800 | -0.81844200 |
| C  | 3.27624600  | -1.84542700 | -1.46971700 |
| C  | 4.25449700  | -1.82994000 | -2.56482300 |
| C  | 4.44366400  | -0.53305800 | -2.90327600 |
| C  | 3.58388800  | 0.26685300  | -2.02127500 |
| C  | 3.48360800  | 1.66427500  | -2.04364300 |
| H  | 4.09025100  | 2.18320800  | -2.77857000 |
| N  | 2.90730600  | -0.56622300 | -1.18212200 |
| H  | 5.09247600  | -0.12459900 | -3.66699100 |
| H  | 4.71541900  | -2.71117300 | -2.99149100 |
| H  | 3.20183700  | -3.94509900 | -1.16322300 |
| H  | 1.73768000  | -5.26230500 | 0.64641700  |

|   |             |             |             |
|---|-------------|-------------|-------------|
| H | -0.00673400 | -4.49291900 | 2.55689300  |
| H | -0.94586800 | -2.13212400 | 3.36055300  |
| H | -1.95706600 | 0.17592400  | 4.24287600  |
| H | -1.60707500 | 2.75992400  | 3.54340100  |
| H | -0.10393900 | 3.99301100  | 1.70388800  |
| H | 1.37584500  | 5.31157200  | -0.09148400 |
| H | 3.14794900  | 4.54518100  | -1.97747600 |
| O | 0.22993000  | -0.08721600 | -0.90079300 |
| S | 3.33506500  | 0.14847000  | 1.84911000  |
| H | 3.13268400  | 1.41633200  | 2.27087000  |
| C | -6.34563800 | -0.71580200 | -0.91454500 |
| C | -5.58015200 | 0.31576700  | -0.06741200 |
| C | -4.44838700 | -0.40639400 | 0.71676700  |
| C | -3.58828000 | -0.25394300 | -0.57651400 |
| C | -4.46066100 | 1.02339000  | -0.91037800 |
| C | -4.72973800 | 1.36107600  | -2.37925100 |
| H | -5.48926700 | 2.14985100  | -2.45948000 |
| H | -3.81497300 | 1.73648400  | -2.85626400 |
| H | -5.07199900 | 0.50405900  | -2.96485200 |
| C | -3.91927100 | 2.28369500  | -0.21687400 |
| H | -4.65077700 | 3.09941300  | -0.28570900 |
| H | -3.69413800 | 2.13080900  | 0.84280500  |
| H | -2.99687300 | 2.62374800  | -0.70507700 |
| C | -3.93170500 | -1.36450300 | -1.53826000 |
| C | -5.38965100 | -1.81195000 | -1.47137900 |
| H | -5.72766100 | -2.17127000 | -2.44964000 |
| H | -5.43803900 | -2.68154000 | -0.80229300 |
| C | -3.03519500 | -1.91389400 | -2.36563900 |
| H | -3.30906800 | -2.69484300 | -3.07265600 |
| H | -1.99284600 | -1.60216500 | -2.35709900 |
| H | -2.50636200 | -0.11023800 | -0.48405500 |



|   |             |             |             |
|---|-------------|-------------|-------------|
| H | -4.64754300 | -1.42197400 | 1.07549800  |
| H | -4.05599500 | 0.18320300  | 1.54758000  |
| H | -6.26725800 | 0.96574300  | 0.48850900  |
| H | -6.86902300 | -0.20633200 | -1.73226900 |
| H | -7.12068500 | -1.19120000 | -0.30085400 |

Coordinate II – TS (-1756.48)

|    |             |             |             |
|----|-------------|-------------|-------------|
| Fe | -1.12266300 | 0.02568200  | 0.30660800  |
| N  | -2.19933700 | -1.36748900 | -0.67905200 |
| C  | -3.14005900 | -1.16871000 | -1.65483100 |
| C  | -3.64632500 | -2.43281200 | -2.13812800 |
| C  | -2.99194800 | -3.40360400 | -1.44335100 |
| C  | -2.09446700 | -2.72741800 | -0.53428900 |
| C  | -1.26015700 | -3.37256800 | 0.37415500  |
| C  | -0.42272600 | -2.75894400 | 1.30549100  |
| C  | 0.36831300  | -3.46988400 | 2.28243000  |
| C  | 1.00476200  | -2.52485000 | 3.03023900  |
| C  | 0.60778700  | -1.24348400 | 2.49730000  |
| N  | -0.26149800 | -1.40602200 | 1.44939100  |
| C  | 1.05917300  | -0.01298900 | 2.97021500  |
| C  | 0.70996900  | 1.23163000  | 2.45251000  |
| C  | 1.20180300  | 2.49574200  | 2.94689000  |
| C  | 0.62423400  | 3.46247100  | 2.18050300  |
| C  | -0.22256600 | 2.78264700  | 1.22801200  |
| N  | -0.15413400 | 1.42672800  | 1.40488400  |
| C  | -1.02379200 | 3.42858700  | 0.28613400  |
| C  | -1.90369300 | 2.81918600  | -0.60361100 |
| C  | -2.75516900 | 3.53227500  | -1.52832300 |
| C  | -3.47461700 | 2.59145200  | -2.19980700 |
| C  | -3.05469100 | 1.30807300  | -1.68584600 |
| C  | -3.54325900 | 0.07916500  | -2.12460500 |

|   |             |             |             |
|---|-------------|-------------|-------------|
| H | -4.29796300 | 0.09535300  | -2.90489600 |
| N | -2.10150900 | 1.46620700  | -0.71532600 |
| H | -4.21950700 | 2.73359000  | -2.97188400 |
| H | -2.78694800 | 4.60905000  | -1.63246000 |
| H | -0.97324500 | 4.51294300  | 0.26098100  |
| H | 0.74210400  | 4.53630400  | 2.24511600  |
| H | 1.89448800  | 2.60955100  | 3.77054300  |
| H | 1.74980300  | -0.02645000 | 3.80774400  |
| H | 1.68154100  | -2.66500300 | 3.86299100  |
| H | 0.41118800  | -4.54716700 | 2.37604900  |
| H | -1.28281200 | -4.45816100 | 0.37651200  |
| H | -3.09698700 | -4.47794000 | -1.52104100 |
| H | -4.40012600 | -2.54265700 | -2.90686300 |
| O | 0.11834200  | -0.04650700 | -0.95358500 |
| S | -2.94899400 | 0.10887200  | 1.96590500  |
| H | -2.20179200 | 0.15793700  | 3.09061800  |
| C | 5.39913900  | 0.16058800  | -1.01501200 |
| C | 4.46242200  | -1.01881600 | -0.69846100 |
| C | 3.45912200  | -0.59408600 | 0.41606700  |
| C | 2.64222000  | -0.00036800 | -0.75105800 |
| C | 3.24615300  | -1.09357400 | -1.70449700 |
| C | 3.46555000  | -0.74327300 | -3.17616800 |
| H | 4.08211100  | -1.51083600 | -3.66113700 |
| H | 2.50424600  | -0.71133000 | -3.70437300 |
| H | 3.95006900  | 0.22453200  | -3.32376000 |
| C | 2.53076900  | -2.45166100 | -1.62512000 |
| H | 3.14318200  | -3.22349600 | -2.10830300 |
| H | 2.33441100  | -2.77723500 | -0.60001700 |
| H | 1.56971000  | -2.40714200 | -2.14929000 |
| C | 3.14036000  | 1.36221000  | -1.13152000 |
| C | 4.64545700  | 1.51503200  | -0.89146300 |

|   |            |             |             |
|---|------------|-------------|-------------|
| H | 5.06303800 | 2.26926500  | -1.56702600 |
| H | 4.78982700 | 1.90276400  | 0.12542900  |
| C | 2.38495800 | 2.32935400  | -1.66454100 |
| H | 2.81640100 | 3.28035200  | -1.96999600 |
| H | 1.31594300 | 2.20033900  | -1.80118700 |
| H | 3.81071900 | 0.09147900  | 1.19177500  |
| H | 2.97678500 | -1.44862400 | 0.89074200  |
| H | 5.01175200 | -1.95790200 | -0.55074800 |
| H | 5.82161200 | 0.04048700  | -2.01917800 |
| H | 6.24544100 | 0.15032400  | -0.31783700 |
| H | 1.27443600 | -0.02214700 | -0.70128000 |

#### Coordinate III

|    |             |             |             |
|----|-------------|-------------|-------------|
| Fe | -1.28387100 | 0.02142100  | 0.29029600  |
| N  | -1.18842500 | -1.96223800 | 0.62654600  |
| C  | -1.81605600 | -2.94739700 | -0.09825700 |
| C  | -1.44325300 | -4.24331000 | 0.40948400  |
| C  | -0.57506100 | -4.03156300 | 1.43834700  |
| C  | -0.41116400 | -2.60522100 | 1.56226600  |
| C  | 0.43509700  | -1.99366000 | 2.47617800  |
| C  | 0.63671400  | -0.62449900 | 2.57543700  |
| C  | 1.48683000  | 0.00329400  | 3.55532300  |
| C  | 1.38674700  | 1.34891500  | 3.36324800  |
| C  | 0.47199700  | 1.54877300  | 2.26781100  |
| N  | 0.04366200  | 0.33373500  | 1.78730100  |
| C  | 0.05841100  | 2.79151200  | 1.81005300  |
| C  | -0.87500100 | 2.99409100  | 0.80429000  |
| C  | -1.27895900 | 4.29157300  | 0.32455700  |
| C  | -2.17525400 | 4.08188700  | -0.67989800 |
| C  | -2.32134000 | 2.65504600  | -0.82055100 |
| N  | -1.53638200 | 2.00952200  | 0.10547600  |

|   |             |             |             |
|---|-------------|-------------|-------------|
| C | -3.11576700 | 2.04268600  | -1.77927100 |
| C | -3.22705300 | 0.67149100  | -1.95260200 |
| C | -4.06835700 | 0.04337600  | -2.94045600 |
| C | -3.93805100 | -1.30250200 | -2.77373900 |
| C | -3.01857300 | -1.50267300 | -1.68168500 |
| C | -2.66677700 | -2.74472200 | -1.17590200 |
| H | -3.09155000 | -3.62151200 | -1.65301400 |
| N | -2.58385900 | -0.28737000 | -1.20634400 |
| H | -4.41778300 | -2.10141200 | -3.32431600 |
| H | -4.67663700 | 0.58021900  | -3.65690300 |
| H | -3.68535800 | 2.68282100  | -2.44451800 |
| H | -2.69150600 | 4.81268700  | -1.28893400 |
| H | -0.90640400 | 5.23061800  | 0.71302700  |
| H | 0.48935000  | 3.66939400  | 2.27952100  |
| H | 1.87062600  | 2.14753600  | 3.91053700  |
| H | 2.07093500  | -0.53264200 | 4.29222900  |
| H | 0.97907700  | -2.63328300 | 3.16302400  |
| H | -0.07380400 | -4.76146700 | 2.06086100  |
| H | -1.80364700 | -5.18325700 | 0.01195300  |
| O | 0.05344200  | -0.01216600 | -0.90066800 |
| H | 0.93818700  | 0.02309900  | -0.46747100 |
| S | -3.03231900 | -0.02665900 | 1.88483100  |
| H | -3.29882500 | 1.29672700  | 1.92830000  |
| C | 5.78378000  | 0.18119500  | -1.01242900 |
| C | 4.85907100  | -0.97658800 | -0.58609000 |
| C | 3.93237500  | -0.49024100 | 0.57414100  |
| C | 3.09260200  | 0.05556400  | -0.58331800 |
| C | 3.57666400  | -1.08657900 | -1.51710300 |
| C | 3.70708100  | -0.80694000 | -3.01325700 |
| H | 4.27262800  | -1.61039000 | -3.50145500 |
| H | 2.71377900  | -0.77344200 | -3.47799900 |

|   |            |             |             |
|---|------------|-------------|-------------|
| H | 4.20213800 | 0.14126700  | -3.23459800 |
| C | 2.84534500 | -2.42521900 | -1.32284900 |
| H | 3.41010100 | -3.23379100 | -1.80305200 |
| H | 2.70593900 | -2.69319700 | -0.27208300 |
| H | 1.85451400 | -2.38232400 | -1.78977400 |
| C | 3.53253600 | 1.39810100  | -1.03990100 |
| C | 5.05483800 | 1.55305800  | -0.90436200 |
| H | 5.43162200 | 2.26717000  | -1.64423400 |
| H | 5.26876800 | 1.98875600  | 0.07995900  |
| C | 2.73076100 | 2.34066100  | -1.54963300 |
| H | 3.12595700 | 3.28740600  | -1.91136400 |
| H | 1.65579000 | 2.19567000  | -1.61144700 |
| H | 4.33700500 | 0.22633900  | 1.29298500  |
| H | 3.46512300 | -1.31565600 | 1.11298500  |
| H | 5.40523600 | -1.91698500 | -0.43102100 |
| H | 6.14188400 | 0.01137900  | -2.03399400 |
| H | 6.67098800 | 0.18900800  | -0.36871100 |

#### Coordinate V

|    |            |             |             |
|----|------------|-------------|-------------|
| Fe | 1.35681500 | -0.02094000 | 0.21469500  |
| N  | 1.52175100 | 0.37172700  | -1.81878900 |
| C  | 1.72256200 | -0.55209700 | -2.81604300 |
| C  | 1.95320400 | 0.12249500  | -4.07004300 |
| C  | 1.91988400 | 1.46232600  | -3.81069800 |
| C  | 1.66830200 | 1.60892100  | -2.39779800 |
| C  | 1.63923700 | 2.81409300  | -1.70385900 |
| C  | 1.43372300 | 2.95541600  | -0.33516600 |
| C  | 1.34093700 | 4.22771700  | 0.33935500  |
| C  | 1.04425800 | 3.96977600  | 1.64314200  |
| C  | 0.95314100 | 2.53630600  | 1.78251900  |
| N  | 1.21517300 | 1.93723200  | 0.56880300  |

|   |             |             |             |
|---|-------------|-------------|-------------|
| C | 0.58265700  | 1.88948800  | 2.95735600  |
| C | 0.42722700  | 0.51546300  | 3.10795200  |
| C | 0.06337600  | -0.15650400 | 4.33240400  |
| C | 0.09673200  | -1.49579600 | 4.07283200  |
| C | 0.48112500  | -1.64403200 | 2.68952500  |
| N | 0.65267800  | -0.40796300 | 2.11806000  |
| C | 0.70273000  | -2.85378000 | 2.04027500  |
| C | 1.09123100  | -2.99901500 | 0.71234400  |
| C | 1.25704700  | -4.27211400 | 0.05365400  |
| C | 1.55222700  | -4.01322400 | -1.25025700 |
| C | 1.57028100  | -2.57860200 | -1.40474500 |
| C | 1.75679000  | -1.92913700 | -2.62121100 |
| H | 1.93838400  | -2.55318100 | -3.49025500 |
| N | 1.30499200  | -1.98008600 | -0.19102400 |
| H | 1.72478900  | -4.71613100 | -2.05497300 |
| H | 1.13748300  | -5.23143500 | 0.54031600  |
| H | 0.55243100  | -3.76381600 | 2.61198800  |
| H | -0.10731400 | -2.31692900 | 4.74802700  |
| H | -0.17390500 | 0.34223300  | 5.26338400  |
| H | 0.39109900  | 2.51363200  | 3.82415200  |
| H | 0.87726700  | 4.67333400  | 2.44847700  |
| H | 1.46751300  | 5.18663500  | -0.14636400 |
| H | 1.78098800  | 3.72487700  | -2.27656600 |
| H | 2.06280200  | 2.28387000  | -4.50089400 |
| H | 2.12855500  | -0.37491200 | -5.01530300 |
| O | -1.18524100 | 0.14962000  | -0.59793700 |
| S | 3.70808900  | -0.13210000 | 0.69809600  |
| H | 3.91162800  | 1.16854100  | 1.00444800  |
| C | -5.30484000 | -0.42788300 | 0.23707000  |
| C | -4.35919300 | 0.75597600  | 0.48947500  |
| C | -3.02320700 | 0.24378900  | 1.10405100  |

|   |             |             |             |
|---|-------------|-------------|-------------|
| C | -2.57208100 | -0.02077900 | -0.35244900 |
| C | -3.55744600 | 1.13703300  | -0.80510000 |
| C | -4.23526900 | 1.02678000  | -2.17406500 |
| H | -5.02138900 | 1.78608800  | -2.27281400 |
| H | -3.50662700 | 1.20572700  | -2.97536900 |
| H | -4.68758700 | 0.04921900  | -2.35818500 |
| C | -2.91283400 | 2.52710700  | -0.69166900 |
| H | -3.68155600 | 3.29862100  | -0.82375200 |
| H | -2.42783000 | 2.70360100  | 0.27204000  |
| H | -2.15800700 | 2.67159900  | -1.47345200 |
| C | -3.13536400 | -1.35567700 | -0.81048100 |
| C | -4.50870200 | -1.68022200 | -0.22470400 |
| H | -5.08952100 | -2.28055800 | -0.93312900 |
| H | -4.34360300 | -2.32545100 | 0.64814000  |
| C | -2.48891100 | -2.18742400 | -1.63289500 |
| H | -2.94188100 | -3.12057600 | -1.95993400 |
| H | -1.48541300 | -1.98588500 | -1.99619700 |
| H | -1.01553800 | 0.12148800  | -1.55437800 |
| H | -3.06209700 | -0.61163700 | 1.78549900  |
| H | -2.43410500 | 1.03852300  | 1.56369500  |
| H | -4.86575900 | 1.58084400  | 1.00235000  |
| H | -6.05686500 | -0.14668400 | -0.50915400 |
| H | -5.85372900 | -0.66534200 | 1.15611300  |

Delta Site – Doublet state

Coordinate I (cis)

|    |             |             |            |
|----|-------------|-------------|------------|
| Fe | -1.46281500 | 0.00757500  | 0.13266300 |
| N  | -0.83911300 | -1.16040200 | 1.65742000 |
| C  | -0.75057300 | -2.52864000 | 1.67289400 |

|   |             |             |             |
|---|-------------|-------------|-------------|
| C | -0.17121800 | -2.98520900 | 2.91307400  |
| C | 0.09182800  | -1.87184000 | 3.65224400  |
| C | -0.32600500 | -0.74190000 | 2.85805400  |
| C | -0.22005600 | 0.58487800  | 3.26338200  |
| C | -0.61518500 | 1.69462500  | 2.52411500  |
| C | -0.48586800 | 3.06014100  | 2.97153700  |
| C | -0.96150000 | 3.84609500  | 1.96673000  |
| C | -1.38267300 | 2.95681200  | 0.91154900  |
| N | -1.17080700 | 1.64944400  | 1.27020300  |
| C | -1.93960100 | 3.37222700  | -0.29392800 |
| C | -2.38742900 | 2.53362900  | -1.30967000 |
| C | -2.99709500 | 2.98772000  | -2.53612900 |
| C | -3.30413300 | 1.87258700  | -3.25427200 |
| C | -2.87754900 | 0.74262700  | -2.46476400 |
| N | -2.32757100 | 1.16321900  | -1.28008900 |
| C | -3.00384800 | -0.58473600 | -2.86019000 |
| C | -2.59914300 | -1.69441100 | -2.12474900 |
| C | -2.74697100 | -3.06057700 | -2.56435100 |
| C | -2.22724600 | -3.84454800 | -1.57975500 |
| C | -1.76667600 | -2.95285700 | -0.54331400 |
| C | -1.17586000 | -3.36662100 | 0.64659200  |
| H | -1.04634600 | -4.43452500 | 0.79137300  |
| N | -2.00425600 | -1.64751300 | -0.89001100 |
| H | -2.15720600 | -4.92355300 | -1.53923200 |
| H | -3.19277800 | -3.35966800 | -3.50379300 |
| H | -3.45819900 | -0.77154000 | -3.82808400 |
| H | -3.77427500 | 1.80124900  | -4.22626600 |
| H | -3.16275100 | 4.02562400  | -2.79333000 |
| H | -2.04744500 | 4.44119100  | -0.44852100 |
| H | -1.03207100 | 4.92507300  | 1.92665000  |
| H | -0.08214600 | 3.35740200  | 3.93038600  |



|   |             |             |             |
|---|-------------|-------------|-------------|
| H | 0.20927400  | 0.77024400  | 4.24289000  |
| H | 0.52367200  | -1.80246200 | 4.64196000  |
| H | -0.00256000 | -4.02304000 | 3.16858600  |
| S | -3.77575300 | -0.11545600 | 1.20173300  |
| H | -4.07627100 | 1.20086900  | 1.14935000  |
| O | 0.01799800  | 0.08992100  | -0.55949500 |
| C | 3.75567400  | -0.67043700 | -2.16271200 |
| C | 5.10037900  | 0.06516400  | -2.03748100 |
| C | 5.10187100  | 1.04035300  | -0.80719000 |
| C | 5.45523200  | -0.24671600 | 0.04188900  |
| C | 6.10001900  | -0.83061200 | -1.25358300 |
| H | 6.03742700  | -1.91356100 | -1.40492000 |
| H | 7.14028400  | -0.52273300 | -1.37584800 |
| C | 4.19278600  | -1.00961900 | 0.35716500  |
| C | 3.43044300  | -1.48799600 | -0.87697600 |
| H | 3.71030800  | -2.53531800 | -1.05318300 |
| C | 3.78622300  | -1.26073500 | 1.60679700  |
| H | 2.86159200  | -1.79561900 | 1.81565000  |
| H | 4.37238500  | -0.94648400 | 2.46798500  |
| H | 6.08324400  | -0.10310300 | 0.92861300  |
| C | 6.27329700  | 2.03422900  | -0.85432600 |
| H | 6.38758500  | 2.53935900  | 0.11326700  |
| H | 6.08504500  | 2.80658500  | -1.61128600 |
| H | 7.23020600  | 1.56218600  | -1.09643900 |
| C | 3.82639600  | 1.81503200  | -0.46388100 |
| H | 3.61976100  | 2.57167000  | -1.23230300 |
| H | 3.94864200  | 2.34275900  | 0.49109100  |
| H | 2.94225300  | 1.17892700  | -0.37385000 |
| H | 5.41983400  | 0.48261300  | -3.00036500 |
| H | 3.79033900  | -1.34972600 | -3.02338300 |
| H | 2.95762300  | 0.05177500  | -2.37152300 |

|   |            |             |             |
|---|------------|-------------|-------------|
| H | 2.35292400 | -1.49045400 | -0.68165000 |
|---|------------|-------------|-------------|

Coordinate II (cis) – TS (-1697.84)

|    |             |             |             |
|----|-------------|-------------|-------------|
| Fe | -1.22461100 | -0.00001900 | 0.22356500  |
| N  | -2.16691100 | 0.37210900  | -1.53619000 |
| C  | -2.32467400 | 1.59953500  | -2.12213700 |
| C  | -2.97629000 | 1.46815900  | -3.40562000 |
| C  | -3.21008200 | 0.13939000  | -3.58838800 |
| C  | -2.69411000 | -0.53457700 | -2.41904800 |
| C  | -2.71541000 | -1.91296200 | -2.22409800 |
| C  | -2.18903400 | -2.58346800 | -1.12307200 |
| C  | -2.18367600 | -4.01894200 | -0.96014700 |
| C  | -1.55768600 | -4.27360500 | 0.22199000  |
| C  | -1.19016100 | -2.99170100 | 0.77845800  |
| N  | -1.58749400 | -1.97703000 | -0.05078800 |
| C  | -0.53652400 | -2.81803500 | 1.99635500  |
| C  | -0.19960400 | -1.60112300 | 2.58365800  |
| C  | 0.40043400  | -1.46985100 | 3.89071200  |
| C  | 0.53171500  | -0.13531900 | 4.12813600  |
| C  | 0.02097500  | 0.54262900  | 2.96074400  |
| N  | -0.41656000 | -0.36485600 | 2.02830900  |
| C  | -0.01186700 | 1.92450800  | 2.79697200  |
| C  | -0.48048300 | 2.58903900  | 1.66620600  |
| C  | -0.48024800 | 4.02181300  | 1.49478600  |
| C  | -1.00275600 | 4.26550000  | 0.26056000  |
| C  | -1.33000800 | 2.98066600  | -0.31208700 |
| C  | -1.92730700 | 2.80955700  | -1.55819400 |
| H  | -2.12191200 | 3.70838400  | -2.13541700 |
| N  | -0.99803300 | 1.97072600  | 0.55641700  |
| H  | -1.16691200 | 5.21706200  | -0.22808500 |
| H  | -0.12282600 | 4.73104600  | 2.22982800  |

|   |             |             |             |
|---|-------------|-------------|-------------|
| H | 0.36693900  | 2.53293600  | 3.61226400  |
| H | 0.93345000  | 0.36004200  | 5.00241700  |
| H | 0.66974000  | -2.30010200 | 4.53048300  |
| H | -0.28896900 | -3.71642500 | 2.55359900  |
| H | -1.35748400 | -5.22887100 | 0.68951300  |
| H | -2.60328300 | -4.72150100 | -1.66832500 |
| H | -3.16545600 | -2.51796400 | -3.00517200 |
| H | -3.68087100 | -0.35535500 | -4.42792800 |
| H | -3.21641800 | 2.29391300  | -4.06260100 |
| S | -3.41852800 | 0.14982300  | 1.31974200  |
| H | -4.15079100 | -0.51676000 | 0.40060400  |
| O | 0.25317500  | -0.17851900 | -0.68134300 |
| C | 3.17492300  | -0.62188000 | 0.81470900  |
| C | 4.51988900  | -0.89423600 | 0.11824700  |
| C | 4.39155900  | -0.84229800 | -1.44620000 |
| C | 4.50232300  | 0.72035400  | -1.26830100 |
| C | 5.31254400  | 0.43754200  | 0.03808800  |
| H | 5.18488400  | 1.14738400  | 0.86291300  |
| H | 6.37938400  | 0.30046700  | -0.14764600 |
| C | 3.19250300  | 1.34373700  | -0.84144300 |
| C | 2.47779400  | 0.63367700  | 0.25662000  |
| H | 2.10334000  | 1.31261400  | 1.02753200  |
| C | 2.73760100  | 2.49610200  | -1.37187100 |
| H | 1.81674700  | 2.96097200  | -1.02702500 |
| H | 3.27987800  | 3.00810200  | -2.16277700 |
| H | 4.97969600  | 1.29024400  | -2.07298600 |
| C | 5.63577400  | -1.41834600 | -2.14397800 |
| H | 5.62378400  | -1.16907000 | -3.21258000 |
| H | 5.64254000  | -2.51250100 | -2.05898000 |
| H | 6.57828100  | -1.04969900 | -1.72887800 |
| C | 3.15337200  | -1.43227400 | -2.12711100 |

|   |            |             |             |
|---|------------|-------------|-------------|
| H | 3.16893400 | -2.52810600 | -2.05514600 |
| H | 3.15482100 | -1.17802600 | -3.19546100 |
| H | 2.20815800 | -1.08481100 | -1.70556400 |
| H | 5.01559500 | -1.77126900 | 0.55177900  |
| H | 3.34814900 | -0.49407500 | 1.89155400  |
| H | 2.51581100 | -1.49438100 | 0.71631000  |
| H | 1.34980800 | 0.25905200  | -0.20353900 |

Coordinate III (cis)

|    |             |             |             |
|----|-------------|-------------|-------------|
| Fe | -1.44376200 | 0.04864600  | 0.25151800  |
| N  | -0.03826300 | 0.19745500  | 1.69678800  |
| C  | 0.51316900  | -0.80563100 | 2.45369300  |
| C  | 1.47889200  | -0.26827700 | 3.38223500  |
| C  | 1.50635100  | 1.07880700  | 3.17694900  |
| C  | 0.55083400  | 1.35719000  | 2.12995600  |
| C  | 0.25066700  | 2.63555400  | 1.66008200  |
| C  | -0.70866700 | 2.96134700  | 0.70343800  |
| C  | -1.00578500 | 4.30823100  | 0.27075300  |
| C  | -1.99491900 | 4.20820700  | -0.65978400 |
| C  | -2.29227400 | 2.80046500  | -0.79372300 |
| N  | -1.50516000 | 2.06004400  | 0.04758000  |
| C  | -3.23604200 | 2.26785800  | -1.67010900 |
| C  | -3.51455300 | 0.91272700  | -1.83465700 |
| C  | -4.47614700 | 0.37694600  | -2.77102400 |
| C  | -4.42969000 | -0.97764900 | -2.64090100 |
| C  | -3.44385700 | -1.26069700 | -1.62176400 |
| N  | -2.90251100 | -0.09803500 | -1.14188800 |
| C  | -3.10673800 | -2.54104800 | -1.18636700 |
| C  | -2.19055500 | -2.86064400 | -0.18568800 |
| C  | -1.92866900 | -4.20303400 | 0.27893200  |
| C  | -1.01634100 | -4.09701100 | 1.28496800  |

|   |             |             |             |
|---|-------------|-------------|-------------|
| C | -0.71786200 | -2.69135100 | 1.42264100  |
| C | 0.18768900  | -2.15568900 | 2.33667700  |
| H | 0.69278300  | -2.84917700 | 3.00194600  |
| N | -1.43960300 | -1.95442000 | 0.51809200  |
| H | -0.57543300 | -4.88345400 | 1.88347800  |
| H | -2.39516400 | -5.09499200 | -0.11869100 |
| H | -3.62414400 | -3.37102800 | -1.65813300 |
| H | -5.00041700 | -1.72780500 | -3.17268600 |
| H | -5.09138400 | 0.97219600  | -3.43316100 |
| H | -3.79277300 | 2.96782700  | -2.28563400 |
| H | -2.48412200 | 4.99831700  | -1.21443400 |
| H | -0.51371300 | 5.19792200  | 0.64168800  |
| H | 0.80422100  | 3.46024800  | 2.09880800  |
| H | 2.10155600  | 1.82714500  | 3.68386000  |
| H | 2.04904500  | -0.85598300 | 4.08981000  |
| S | -3.15391400 | 0.20780100  | 1.96136900  |
| H | -3.98314400 | 1.07817000  | 1.34390300  |
| O | -0.19374600 | -0.03921100 | -1.07240500 |
| H | 0.52653500  | -0.61510000 | -0.75807300 |
| C | 5.23545100  | -0.29682400 | -2.70762400 |
| C | 5.72214800  | 0.23441700  | -1.34654700 |
| C | 4.52777100  | 0.81539300  | -0.50334100 |
| C | 4.24476200  | -0.69202600 | -0.12452200 |
| C | 5.76618900  | -0.95394100 | -0.34583300 |
| H | 6.04433800  | -1.93517900 | -0.74532500 |
| H | 6.36787200  | -0.74813900 | 0.54113700  |
| C | 3.49848400  | -1.39184400 | -1.24879100 |
| C | 4.03740900  | -1.18669600 | -2.52960100 |
| H | 3.58429100  | -1.65717600 | -3.39950000 |
| C | 2.38947600  | -2.18194400 | -1.01865100 |
| H | 1.89357500  | -2.70497800 | -1.83216000 |

|   |            |             |             |
|---|------------|-------------|-------------|
| H | 2.02019300 | -2.35991300 | -0.01310800 |
| H | 3.80527900 | -0.89799200 | 0.85691700  |
| C | 5.01472200 | 1.62589400  | 0.70891600  |
| H | 4.18313300 | 1.81264500  | 1.39992200  |
| H | 5.40143000 | 2.59967100  | 0.38260700  |
| H | 5.80848900 | 1.12838700  | 1.27355000  |
| C | 3.43857400 | 1.62579200  | -1.21146500 |
| H | 3.84563000 | 2.58253000  | -1.56343100 |
| H | 2.61964400 | 1.85220000  | -0.51676800 |
| H | 3.00519200 | 1.10880400  | -2.07160000 |
| H | 6.61451600 | 0.86096400  | -1.45643400 |
| H | 6.04594100 | -0.85471700 | -3.20391000 |
| H | 4.99287600 | 0.53023400  | -3.39379000 |

Coordinate V (cis)

|    |             |             |             |
|----|-------------|-------------|-------------|
| Fe | 1.31044600  | 0.06450600  | 0.27348000  |
| N  | 1.31633200  | 2.02810600  | -0.19860600 |
| C  | 1.78428200  | 2.62529000  | -1.34765900 |
| C  | 1.67701200  | 4.06002600  | -1.24418800 |
| C  | 1.15009300  | 4.32719600  | -0.01654400 |
| C  | 0.93361600  | 3.05580200  | 0.63197000  |
| C  | 0.41597700  | 2.91177200  | 1.91322300  |
| C  | 0.20016100  | 1.70403800  | 2.56608100  |
| C  | -0.35315600 | 1.59103900  | 3.89497300  |
| C  | -0.42236500 | 0.26090400  | 4.18246500  |
| C  | 0.09033200  | -0.44028900 | 3.03070800  |
| N  | 0.45983300  | 0.45507600  | 2.05319700  |
| C  | 0.19628600  | -1.82216300 | 2.93220800  |
| C  | 0.69930000  | -2.49701900 | 1.82673800  |
| C  | 0.82484300  | -3.93101900 | 1.73004000  |
| C  | 1.36954400  | -4.19550300 | 0.50976800  |

|   |             |             |             |
|---|-------------|-------------|-------------|
| C | 1.57736100  | -2.92329000 | -0.14098000 |
| N | 1.15603800  | -1.89978000 | 0.67420800  |
| C | 2.12361600  | -2.77846000 | -1.41070000 |
| C | 2.33689400  | -1.57155500 | -2.06565800 |
| C | 2.90240900  | -1.45818100 | -3.39003500 |
| C | 2.95099000  | -0.12949800 | -3.68550300 |
| C | 2.41509600  | 0.56990400  | -2.54223500 |
| C | 2.29665200  | 1.95102300  | -2.44876000 |
| H | 2.63106300  | 2.54486000  | -3.29336000 |
| N | 2.04288600  | -0.32523800 | -1.56723800 |
| H | 3.30933300  | 0.34994200  | -4.58759600 |
| H | 3.21245300  | -2.29753800 | -3.99956200 |
| H | 2.40664900  | -3.68540500 | -1.93583100 |
| H | 1.61351200  | -5.15575400 | 0.07328100  |
| H | 0.52905200  | -4.62814100 | 2.50365000  |
| H | -0.13159200 | -2.41532600 | 3.77984700  |
| H | -0.78428400 | -0.21777200 | 5.08351100  |
| H | -0.64776700 | 2.43110100  | 4.51112000  |
| H | 0.15659400  | 3.81926100  | 2.44952100  |
| H | 0.92207000  | 5.28894100  | 0.42523900  |
| H | 1.97127300  | 4.75626400  | -2.01919500 |
| S | 3.41313000  | 0.18200300  | 1.13728400  |
| H | 3.20531800  | -0.53187100 | 2.26583200  |
| C | -2.71913000 | 0.74673500  | 0.43518600  |
| C | -4.23467300 | 0.48160700  | 0.37900200  |
| C | -4.73752100 | 0.34190100  | -1.10165900 |
| C | -4.21980600 | -1.15066100 | -0.99096800 |
| C | -4.49014600 | -1.04453300 | 0.54231400  |
| H | -3.83708600 | -1.60570700 | 1.21857400  |
| H | -5.52537900 | -1.27744800 | 0.79523700  |
| C | -2.73144900 | -1.18715300 | -1.24359300 |

|   |             |             |             |
|---|-------------|-------------|-------------|
| C | -1.92417600 | -0.43260600 | -0.18567700 |
| H | -1.67532500 | -1.13777900 | 0.61100600  |
| C | -2.16442800 | -1.81180200 | -2.27979600 |
| H | -1.09123400 | -1.78837800 | -2.44337600 |
| H | -2.76489400 | -2.36307900 | -2.99938300 |
| H | -4.75109400 | -1.91167800 | -1.57239000 |
| C | -6.27021800 | 0.41348100  | -1.20203300 |
| H | -6.60462000 | 0.07440600  | -2.19034100 |
| H | -6.60771300 | 1.44994200  | -1.07498100 |
| H | -6.78385500 | -0.19412800 | -0.45161700 |
| C | -4.14889500 | 1.24635200  | -2.18711800 |
| H | -4.43340400 | 2.29155500  | -2.01096900 |
| H | -4.53893700 | 0.95957700  | -3.17188900 |
| H | -3.05888600 | 1.20168100  | -2.25177100 |
| H | -4.78181200 | 1.17527800  | 1.02769800  |
| H | -2.39435400 | 0.88419500  | 1.47128300  |
| H | -2.47629100 | 1.67665200  | -0.09431200 |
| O | -0.62884500 | -0.03284700 | -0.67390500 |
| H | -0.71634000 | 0.69274300  | -1.31536500 |

Coordinate I (trans)

|    |            |             |             |
|----|------------|-------------|-------------|
| Fe | 1.45284200 | 0.05421500  | 0.17468700  |
| N  | 2.64324500 | 0.13839700  | -1.45499200 |
| C  | 3.18701700 | -0.92294700 | -2.13402400 |
| C  | 3.89734000 | -0.46490300 | -3.30359000 |
| C  | 3.77022800 | 0.89010500  | -3.33114800 |
| C  | 2.98401100 | 1.25427900  | -2.17735200 |
| C  | 2.63470700 | 2.55780500  | -1.84100300 |
| C  | 1.90802800 | 2.93678700  | -0.71657000 |
| C  | 1.58859500 | 4.30081700  | -0.37157600 |
| C  | 0.88222500 | 4.25257300  | 0.79149500  |



|   |             |             |             |
|---|-------------|-------------|-------------|
| C | 0.77078500  | 2.85940700  | 1.14949500  |
| N | 1.40766900  | 2.07188400  | 0.22362700  |
| C | 0.10005700  | 2.38822400  | 2.27321500  |
| C | -0.03165600 | 1.05269100  | 2.64134900  |
| C | -0.73374100 | 0.59671100  | 3.81649500  |
| C | -0.64013500 | -0.76179100 | 3.82304000  |
| C | 0.12099800  | -1.12752900 | 2.65272000  |
| N | 0.48418500  | -0.01036700 | 1.94561100  |
| C | 0.45363000  | -2.43379100 | 2.30546400  |
| C | 1.20953000  | -2.80928400 | 1.19953400  |
| C | 1.56412000  | -4.17007600 | 0.87700400  |
| C | 2.30458500  | -4.11876300 | -0.26450300 |
| C | 2.39761800  | -2.72712100 | -0.63367900 |
| C | 3.07100200  | -2.25609300 | -1.75646400 |
| H | 3.54996400  | -2.99473000 | -2.39147900 |
| N | 1.72952900  | -1.94300300 | 0.27194100  |
| H | 2.75514800  | -4.93284500 | -0.81697500 |
| H | 1.27841800  | -5.03504400 | 1.46092600  |
| H | 0.10310000  | -3.22658800 | 2.95864600  |
| H | -1.03649100 | -1.46317300 | 4.54522000  |
| H | -1.22464600 | 1.24476600  | 4.53051900  |
| H | -0.36098300 | 3.12803900  | 2.91987700  |
| H | 0.46740000  | 5.07010000  | 1.36642000  |
| H | 1.87826200  | 5.16653800  | -0.95264100 |
| H | 2.96832200  | 3.34827900  | -2.50556600 |
| H | 4.16700900  | 1.59168700  | -4.05293500 |
| H | 4.41875200  | -1.10976700 | -3.99858700 |
| S | 3.61269400  | 0.21488900  | 1.52618900  |
| H | 4.14418600  | 1.28607000  | 0.89656600  |
| O | 0.07910100  | -0.06101400 | -0.70896700 |
| C | -3.97807900 | -0.76262500 | 0.84782700  |

|   |             |             |             |
|---|-------------|-------------|-------------|
| C | -4.56547100 | 0.57274600  | 0.35815200  |
| C | -3.61517800 | 1.18755900  | -0.70893000 |
| C | -4.34866100 | 0.27787300  | -1.74335500 |
| C | -5.61070700 | 0.34599600  | -0.79161300 |
| C | -3.75591100 | -1.10904300 | -1.69588400 |
| C | -3.26442300 | -1.52020200 | -0.31073700 |
| H | -3.34131800 | -2.60584200 | -0.18143000 |
| C | -3.65886400 | -1.89926200 | -2.77178500 |
| H | -3.25636300 | -2.90860500 | -2.70869400 |
| H | -3.97557200 | -1.56061100 | -3.75603100 |
| H | -4.47778700 | 0.63775400  | -2.77061500 |
| H | -4.88304200 | 1.20325100  | 1.19792700  |
| H | -4.77271500 | -1.37933800 | 1.28476900  |
| H | -3.25644000 | -0.57274200 | 1.65225300  |
| H | -2.19315200 | -1.28357000 | -0.26586500 |
| C | -6.54374200 | -0.86584000 | -0.72792800 |
| H | -7.25810300 | -0.75756800 | 0.09876000  |
| H | -7.12513100 | -0.94697600 | -1.65557000 |
| H | -6.01457500 | -1.81251300 | -0.59368700 |
| C | -6.46273000 | 1.59733200  | -1.05760800 |
| H | -7.20427100 | 1.72759000  | -0.25875300 |
| H | -5.87342300 | 2.51748100  | -1.11286400 |
| H | -7.00960100 | 1.49599400  | -2.00379200 |
| H | -2.53834600 | 1.03581400  | -0.58114800 |
| H | -3.80187800 | 2.24864000  | -0.88595900 |

Coordinate II (trans) – TS (-1661.71)

|    |             |            |            |
|----|-------------|------------|------------|
| Fe | -1.27880700 | 0.00789600 | 0.20876200 |
| N  | -0.72563000 | 1.67336100 | 1.19205200 |
| C  | -0.15826500 | 1.77370300 | 2.43799100 |
| C  | 0.09007200  | 3.15542100 | 2.77230000 |

|   |             |             |             |
|---|-------------|-------------|-------------|
| C | -0.33186500 | 3.89426600  | 1.70837100  |
| C | -0.84534800 | 2.96089300  | 0.73332800  |
| C | -1.40861800 | 3.33356200  | -0.48492100 |
| C | -1.98724600 | 2.47919100  | -1.42018900 |
| C | -2.59874600 | 2.91090000  | -2.65645200 |
| C | -3.05520500 | 1.78819900  | -3.27691500 |
| C | -2.71384500 | 0.67593400  | -2.42031400 |
| N | -2.07211700 | 1.11816100  | -1.29283400 |
| C | -2.98502500 | -0.65924400 | -2.70873800 |
| C | -2.62977300 | -1.74726600 | -1.91612300 |
| C | -2.88350400 | -3.12894000 | -2.25363600 |
| C | -2.35897100 | -3.87793400 | -1.24473400 |
| C | -1.79362200 | -2.94924800 | -0.29253100 |
| N | -1.97350100 | -1.65958500 | -0.71545200 |
| C | -1.16567700 | -3.31996600 | 0.89467400  |
| C | -0.64263200 | -2.45693800 | 1.85412800  |
| C | -0.07529100 | -2.88814500 | 3.11026400  |
| C | 0.27764400  | -1.76043800 | 3.78711600  |
| C | -0.06571000 | -0.64584100 | 2.93722400  |
| C | 0.14524500  | 0.69211200  | 3.25974200  |
| H | 0.59118800  | 0.90847800  | 4.22549700  |
| N | -0.62209000 | -1.08728700 | 1.76345800  |
| H | 0.72852100  | -1.67255300 | 4.76692600  |
| H | 0.02250700  | -3.92059700 | 3.41957600  |
| H | -1.09919600 | -4.38339100 | 1.10366700  |
| H | -2.34830100 | -4.95471000 | -1.13677400 |
| H | -3.39216700 | -3.46139600 | -3.14913100 |
| H | -3.50214200 | -0.87101200 | -3.63958200 |
| H | -3.57119700 | 1.70135400  | -4.22419100 |
| H | -2.66280900 | 3.93957300  | -2.98649900 |
| H | -1.42012200 | 4.39467100  | -0.71505800 |

|   |             |             |             |
|---|-------------|-------------|-------------|
| H | -0.31411200 | 4.96891200  | 1.58207200  |
| H | 0.52910400  | 3.49576600  | 3.70101600  |
| S | -3.45914100 | 0.17152100  | 1.33862800  |
| H | -4.25646600 | -0.09025400 | 0.27981100  |
| O | 0.17868600  | -0.13614100 | -0.72949700 |
| C | 3.06985900  | -1.29417000 | 0.23158200  |
| C | 3.96283600  | -1.46287000 | -1.00974400 |
| C | 3.31093600  | -0.70484400 | -2.20054700 |
| C | 4.01607900  | 0.57056000  | -1.64512300 |
| C | 5.11268100  | -0.39374400 | -1.03607000 |
| C | 3.17971900  | 1.14662900  | -0.52633000 |
| C | 2.49286600  | 0.13058800  | 0.31019300  |
| H | 2.26426300  | 0.47083600  | 1.32362900  |
| C | 3.06342700  | 2.47239500  | -0.30751700 |
| H | 2.47147700  | 2.86641800  | 0.51534100  |
| H | 3.56256000  | 3.19737200  | -0.94579300 |
| H | 4.35427900  | 1.34075000  | -2.34687300 |
| H | 4.25361500  | -2.51052100 | -1.15229600 |
| H | 3.63930800  | -1.51749100 | 1.14423800  |
| H | 2.25059400  | -2.02379800 | 0.19841300  |
| H | 1.32065200  | 0.04147600  | -0.16778700 |
| C | 5.79470700  | 0.00508500  | 0.27546800  |
| H | 6.39040400  | -0.83027400 | 0.66578100  |
| H | 6.47933800  | 0.84652200  | 0.10770800  |
| H | 5.09155600  | 0.30807300  | 1.05563900  |
| C | 6.20367600  | -0.73928600 | -2.06179600 |
| H | 6.82492600  | -1.56424000 | -1.69005900 |
| H | 5.80272400  | -1.04079200 | -3.03392600 |
| H | 6.86186500  | 0.12315500  | -2.22660100 |
| H | 2.21789200  | -0.68996800 | -2.24791000 |
| H | 3.70642300  | -1.00876800 | -3.17148100 |

Coordinate III (trans)

|    |             |             |             |
|----|-------------|-------------|-------------|
| Fe | -1.42204900 | -0.01498900 | 0.23093400  |
| N  | -2.64649800 | -0.63187200 | -1.25349300 |
| C  | -3.29808300 | 0.17498000  | -2.14794600 |
| C  | -4.06156900 | -0.62133800 | -3.08310200 |
| C  | -3.85914900 | -1.92376200 | -2.74083400 |
| C  | -2.97147100 | -1.91609900 | -1.59990300 |
| C  | -2.50752100 | -3.05776600 | -0.94914900 |
| C  | -1.64456900 | -3.06969400 | 0.14320900  |
| C  | -1.15873300 | -4.26428500 | 0.79603600  |
| C  | -0.33660400 | -3.85048600 | 1.79967400  |
| C  | -0.32683400 | -2.40476300 | 1.75635400  |
| N  | -1.13015500 | -1.95159100 | 0.74599500  |
| C  | 0.39601200  | -1.59766400 | 2.63569400  |
| C  | 0.42023400  | -0.20387000 | 2.64571700  |
| C  | 1.13961800  | 0.59257700  | 3.61314300  |
| C  | 0.90443300  | 1.89824200  | 3.29836200  |
| C  | 0.04523500  | 1.89380800  | 2.13755000  |
| N  | -0.23551700 | 0.60636100  | 1.75406100  |
| C  | -0.42836800 | 3.03401900  | 1.49247000  |
| C  | -1.26654600 | 3.04175100  | 0.37819600  |
| C  | -1.73929500 | 4.23417100  | -0.28564700 |
| C  | -2.52575500 | 3.81805100  | -1.31718700 |
| C  | -2.53276100 | 2.37362700  | -1.27646000 |
| C  | -3.24257700 | 1.56722600  | -2.16323400 |
| H  | -3.81382000 | 2.07287700  | -2.93599600 |
| N  | -1.75928000 | 1.92173600  | -0.23810000 |
| H  | -3.05940100 | 4.41678300  | -2.04401200 |
| H  | -1.49217300 | 5.24531500  | 0.01089300  |
| H  | -0.12118500 | 3.99592000  | 1.89121000  |

|   |             |             |             |
|---|-------------|-------------|-------------|
| H | 1.26844800  | 2.78869500  | 3.79441900  |
| H | 1.73692500  | 0.19058400  | 4.42133100  |
| H | 0.97688000  | -2.10354400 | 3.40106400  |
| H | 0.21713100  | -4.45014000 | 2.51055400  |
| H | -1.42072000 | -5.27464600 | 0.50967000  |
| H | -2.84203500 | -4.01795400 | -1.32989600 |
| H | -4.26095100 | -2.81536500 | -3.20467800 |
| H | -4.66477500 | -0.21933500 | -3.88694300 |
| S | -3.30404200 | 0.05917100  | 1.74539600  |
| H | -3.91505200 | -1.08832600 | 1.37523500  |
| O | 0.00046400  | -0.09842200 | -0.92159400 |
| C | 3.65681500  | -0.75767800 | 0.67179900  |
| C | 4.26153300  | -1.36017800 | -0.60980900 |
| C | 3.30969200  | -1.02866500 | -1.79326100 |
| C | 4.04163000  | 0.34770100  | -1.86452800 |
| C | 5.30816600  | -0.38017800 | -1.25871300 |
| C | 3.41393900  | 1.25102300  | -0.81809400 |
| C | 3.22028100  | 0.65146900  | 0.44250800  |
| H | 2.79431800  | 1.22111300  | 1.26428000  |
| C | 3.06469100  | 2.56123000  | -1.05291900 |
| H | 2.62061000  | 3.17229000  | -0.27209200 |
| H | 3.22131500  | 3.02554700  | -2.02184000 |
| H | 4.14993400  | 0.84791200  | -2.83194200 |
| H | 4.56924600  | -2.40004200 | -0.45567300 |
| H | 4.36263700  | -0.79101400 | 1.51720400  |
| H | 2.79041400  | -1.35457800 | 1.01047100  |
| H | 0.57737400  | 0.65192100  | -0.70146200 |
| C | 6.26095800  | 0.40723200  | -0.35451500 |
| H | 6.98785100  | -0.26980300 | 0.11179700  |
| H | 6.82521900  | 1.14078500  | -0.94434700 |
| H | 5.75338300  | 0.95247900  | 0.44597300  |

|   |            |             |             |
|---|------------|-------------|-------------|
| C | 6.14418100 | -1.06844300 | -2.34946200 |
| H | 6.87903700 | -1.74266500 | -1.89196800 |
| H | 5.54449700 | -1.65853700 | -3.04804000 |
| H | 6.69686400 | -0.32214000 | -2.93355700 |
| H | 2.23657100 | -1.00318800 | -1.58003600 |
| H | 3.49033800 | -1.64646400 | -2.67441400 |

Coordinate V (trans)

|    |             |             |             |
|----|-------------|-------------|-------------|
| Fe | -1.29276100 | 0.06239000  | 0.26233100  |
| N  | -0.54993800 | 1.06684400  | 1.83823100  |
| C  | -0.10644100 | 0.55537600  | 3.03601000  |
| C  | 0.27011800  | 1.62542900  | 3.92791800  |
| C  | 0.04082800  | 2.79084500  | 3.26119600  |
| C  | -0.47581000 | 2.43368000  | 1.96089300  |
| C  | -0.83457800 | 3.35485900  | 0.98415400  |
| C  | -1.33403600 | 3.04140300  | -0.27411800 |
| C  | -1.68554600 | 4.02299700  | -1.27363800 |
| C  | -2.12376700 | 3.33528300  | -2.36444900 |
| C  | -2.04058600 | 1.93296500  | -2.03278600 |
| N  | -1.55533600 | 1.77367000  | -0.75603000 |
| C  | -2.40819300 | 0.90119700  | -2.88754500 |
| C  | -2.33741500 | -0.44959700 | -2.57244500 |
| C  | -2.74906600 | -1.51833900 | -3.44785900 |
| C  | -2.54658100 | -2.68345500 | -2.77025100 |
| C  | -2.00981600 | -2.32969500 | -1.47889000 |
| N  | -1.87883400 | -0.96191600 | -1.37807900 |
| C  | -1.67241200 | -3.24795700 | -0.49229100 |
| C  | -1.15919100 | -2.93333600 | 0.76084700  |
| C  | -0.81890400 | -3.91422200 | 1.76438700  |
| C  | -0.35797600 | -3.22787300 | 2.84721700  |
| C  | -0.41550300 | -1.82742700 | 2.50676400  |
| C  | -0.03901700 | -0.79460000 | 3.35624700  |

|   |             |             |             |
|---|-------------|-------------|-------------|
| H | 0.32868900  | -1.06128600 | 4.34192500  |
| N | -0.89919800 | -1.66610300 | 1.22811900  |
| H | -0.00684000 | -3.61686500 | 3.79449300  |
| H | -0.92472500 | -4.98423900 | 1.63819700  |
| H | -1.82332700 | -4.29881200 | -0.71831700 |
| H | -2.73639000 | -3.69709300 | -3.09978900 |
| H | -3.13973800 | -1.37845900 | -4.44770600 |
| H | -2.78540900 | 1.17036200  | -3.86895100 |
| H | -2.47132000 | 3.72319500  | -3.31351300 |
| H | -1.59814200 | 5.09384000  | -1.14050900 |
| H | -0.71375200 | 4.40669400  | 1.22361300  |
| H | 0.20160100  | 3.80616300  | 3.60089200  |
| H | 0.65663800  | 1.48432000  | 4.92921000  |
| S | -3.39979200 | 0.14708800  | 1.12170700  |
| H | -4.05941600 | 0.44851800  | -0.01870200 |
| C | 2.66287400  | 0.90798700  | 0.36872100  |
| C | 3.80295800  | 1.26814300  | -0.59826500 |
| C | 4.85431700  | 0.10685000  | -0.69976200 |
| C | 3.84647500  | -0.52830500 | -1.74165700 |
| C | 3.36740400  | 0.92410400  | -2.04944900 |
| H | 2.31287300  | 1.06148500  | -2.30412000 |
| H | 3.98180400  | 1.40985900  | -2.80949700 |
| C | 2.75784500  | -1.26172300 | -1.00397700 |
| C | 1.94789800  | -0.40624600 | -0.02943400 |
| C | 2.47976600  | -2.56118000 | -1.16647100 |
| H | 1.70713000  | -3.06024900 | -0.58525200 |
| H | 3.01821900  | -3.17039300 | -1.88851300 |
| H | 4.27193600  | -1.13361700 | -2.54929900 |
| C | 6.15987700  | 0.56048400  | -1.37119000 |
| H | 6.77420200  | -0.30769000 | -1.64082900 |
| H | 6.74487600  | 1.17909600  | -0.67871600 |



|   |            |             |             |
|---|------------|-------------|-------------|
| H | 5.99711100 | 1.14706000  | -2.28005000 |
| C | 5.21171400 | -0.69473700 | 0.55494800  |
| H | 5.76671500 | -0.06763000 | 1.26437200  |
| H | 5.85560500 | -1.54374700 | 0.29228400  |
| H | 4.34121300 | -1.09960000 | 1.07866300  |
| H | 4.19006400 | 2.27293600  | -0.39241000 |
| H | 1.91451900 | 1.70629800  | 0.38139800  |
| H | 3.04540200 | 0.81984000  | 1.39174100  |
| O | 0.68101400 | -0.04487100 | -0.68062100 |
| H | 1.68706000 | -0.99064800 | 0.85584100  |
| H | 0.48346000 | -0.72082400 | -1.35405200 |

#### Delta Site – Quartet state

##### Coordinate I (cis)

|    |             |             |             |
|----|-------------|-------------|-------------|
| Fe | -1.46470400 | 0.00608200  | 0.13290700  |
| N  | -1.25763400 | 1.70588900  | 1.20316500  |
| C  | -0.72061700 | 1.83791300  | 2.45812600  |
| C  | -0.67310900 | 3.22692800  | 2.84552700  |
| C  | -1.18681200 | 3.93858400  | 1.80450700  |
| C  | -1.54546100 | 2.98034100  | 0.78715300  |
| C  | -2.10649800 | 3.31273500  | -0.44221000 |
| C  | -2.47400900 | 2.41388300  | -1.43787600 |
| C  | -3.05965300 | 2.79126500  | -2.70157700 |
| C  | -3.26446200 | 1.63828200  | -3.39591000 |
| C  | -2.80453800 | 0.56155900  | -2.55254600 |
| N  | -2.33102700 | 1.05118300  | -1.36150700 |
| C  | -2.84941600 | -0.78529700 | -2.89836100 |
| C  | -2.43902400 | -1.84198300 | -2.09152300 |
| C  | -2.52114000 | -3.23376200 | -2.46278200 |
| C  | -2.02706700 | -3.94644500 | -1.41320600 |

|   |             |             |             |
|---|-------------|-------------|-------------|
| C | -1.64378300 | -2.98690500 | -0.40618100 |
| N | -1.90869400 | -1.70960800 | -0.83282300 |
| C | -1.07750100 | -3.31867600 | 0.82015100  |
| C | -0.69960900 | -2.41868700 | 1.81188500  |
| C | -0.12585800 | -2.79775400 | 3.08054400  |
| C | 0.09757900  | -1.64273800 | 3.76692600  |
| C | -0.34026800 | -0.56495500 | 2.91290400  |
| C | -0.28778300 | 0.78282300  | 3.25535700  |
| H | 0.11951600  | 1.03218300  | 4.23009000  |
| N | -0.82448500 | -1.05579700 | 1.72790700  |
| H | 0.51281600  | -1.51355300 | 4.75768300  |
| H | 0.06799200  | -3.81677600 | 3.38855900  |
| H | -0.91950900 | -4.37330400 | 1.02274600  |
| H | -1.92400700 | -5.01872900 | -1.31145700 |
| H | -2.91024400 | -3.59719500 | -3.40475700 |
| H | -3.24936400 | -1.03394100 | -3.87632800 |
| H | -3.68761100 | 1.50867100  | -4.38326500 |
| H | -3.27820600 | 3.80852700  | -2.99871100 |
| H | -2.27589200 | 4.36650900  | -0.63991300 |
| H | -1.32034500 | 5.00867700  | 1.71600200  |
| H | -0.29620700 | 3.58895900  | 3.79299900  |
| O | 0.03121100  | 0.11091000  | -0.52498100 |
| S | -3.77511900 | -0.14948600 | 1.15539800  |
| H | -4.44635700 | -0.53732800 | 0.04870000  |
| C | 3.76688500  | -0.86435100 | -2.01836600 |
| C | 5.09199800  | -0.08375700 | -2.00304900 |
| C | 5.06792200  | 1.05538400  | -0.92309500 |
| C | 5.45415000  | -0.08914800 | 0.09828700  |
| C | 6.11443900  | -0.83354200 | -1.10378900 |
| H | 6.08019000  | -1.92824600 | -1.10028600 |
| H | 7.14633300  | -0.51923100 | -1.27184500 |

|   |            |             |             |
|---|------------|-------------|-------------|
| C | 4.21244200 | -0.83288000 | 0.52249700  |
| C | 3.46367600 | -1.50091500 | -0.62910300 |
| H | 3.77224900 | -2.55460900 | -0.65684800 |
| H | 2.38659500 | -1.50545200 | -0.43156600 |
| C | 3.81345600 | -0.91702400 | 1.79672200  |
| H | 2.90423900 | -1.44262100 | 2.08264700  |
| H | 4.39122800 | -0.46910700 | 2.60267100  |
| H | 6.07787500 | 0.19455100  | 0.95373600  |
| C | 6.21324700 | 2.06240700  | -1.11401000 |
| H | 6.31334000 | 2.70243800  | -0.22813000 |
| H | 6.00560800 | 2.71452400  | -1.97226900 |
| H | 7.18246600 | 1.58599400  | -1.28939100 |
| C | 3.77274300 | 1.83808800  | -0.68912600 |
| H | 3.54748600 | 2.47264600  | -1.55649800 |
| H | 3.88105800 | 2.49910000  | 0.18081600  |
| H | 2.90480900 | 1.19926100  | -0.50723900 |
| H | 5.40068700 | 0.20127200  | -3.01643200 |
| H | 3.81918700 | -1.65690700 | -2.77501500 |
| H | 2.94989800 | -0.19984000 | -2.32323800 |

Coordinate II (cis) – TS (-1858.04)

|    |             |             |             |
|----|-------------|-------------|-------------|
| Fe | -1.22974600 | -0.00575100 | 0.20468000  |
| N  | -2.17660100 | 0.44487700  | -1.51507300 |
| C  | -2.32926000 | 1.69751800  | -2.05524500 |
| C  | -3.01308600 | 1.61971600  | -3.32583700 |
| C  | -3.27276500 | 0.30224100  | -3.54891100 |
| C  | -2.74098000 | -0.41999000 | -2.41653700 |
| C  | -2.78107900 | -1.80419900 | -2.26811000 |
| C  | -2.25804800 | -2.51929200 | -1.19349300 |
| C  | -2.29040500 | -3.95778000 | -1.06812300 |
| C  | -1.65942600 | -4.26013900 | 0.09973900  |

|   |             |             |             |
|---|-------------|-------------|-------------|
| C | -1.24974300 | -3.00494300 | 0.68615000  |
| N | -1.62718100 | -1.95581000 | -0.11483800 |
| C | -0.58111500 | -2.88552500 | 1.90060200  |
| C | -0.21071800 | -1.69417500 | 2.52468500  |
| C | 0.40592900  | -1.61468300 | 3.82835400  |
| C | 0.55907600  | -0.28951700 | 4.10524200  |
| C | 0.04487800  | 0.42997300  | 2.96396100  |
| N | -0.41624800 | -0.44176000 | 2.01187100  |
| C | 0.03149100  | 1.81795900  | 2.84133400  |
| C | -0.42893000 | 2.52971600  | 1.73529200  |
| C | -0.39407300 | 3.96741900  | 1.61103200  |
| C | -0.91863600 | 4.26351600  | 0.38863400  |
| C | -1.28060400 | 3.00457800  | -0.21990200 |
| C | -1.90003300 | 2.88140500  | -1.46376400 |
| H | -2.08722000 | 3.80025300  | -2.01115100 |
| N | -0.96902200 | 1.96200700  | 0.61040300  |
| H | -1.06312500 | 5.23380200  | -0.06825000 |
| H | -0.01446600 | 4.64357300  | 2.36586500  |
| H | 0.42817400  | 2.39376200  | 3.67184000  |
| H | 0.97803600  | 0.17279500  | 4.98947100  |
| H | 0.67015600  | -2.46802300 | 4.43915100  |
| H | -0.34947600 | -3.80717700 | 2.42580200  |
| H | -1.48197400 | -5.23251800 | 0.54036800  |
| H | -2.73801400 | -4.62959300 | -1.78881700 |
| H | -3.25387500 | -2.37521400 | -3.06117300 |
| H | -3.77220800 | -0.15527400 | -4.39292400 |
| H | -3.25602200 | 2.47122800  | -3.94793000 |
| S | -3.39840400 | 0.15722000  | 1.36634400  |
| H | -4.16591700 | -0.45973600 | 0.44055000  |
| O | 0.28730800  | -0.14412900 | -0.65417700 |
| C | 3.21659000  | -0.65596000 | 0.80597400  |

|   |            |             |             |
|---|------------|-------------|-------------|
| C | 4.53802200 | -0.93935100 | 0.06927000  |
| C | 4.37326300 | -0.84744700 | -1.49012200 |
| C | 4.51900200 | 0.70781700  | -1.27801500 |
| C | 5.35602000 | 0.37773900  | 0.00022900  |
| H | 5.26303600 | 1.07009000  | 0.84432900  |
| H | 6.41506000 | 0.22366300  | -0.21507100 |
| C | 3.23433400 | 1.34846600  | -0.80063900 |
| C | 2.53251800 | 0.62567100  | 0.29323200  |
| H | 2.18058100 | 1.29065500  | 1.08575800  |
| C | 2.79719500 | 2.52672100  | -1.29028300 |
| H | 1.89971200 | 3.00802800  | -0.90802500 |
| H | 3.33197900 | 3.04400800  | -2.08292100 |
| H | 4.98788800 | 1.28729700  | -2.08101000 |
| C | 5.58939000 | -1.43020600 | -2.23086100 |
| H | 5.55747800 | -1.15481200 | -3.29268000 |
| H | 5.57654500 | -2.52610800 | -2.17247400 |
| H | 6.54857100 | -1.09010600 | -1.82982100 |
| C | 3.10884900 | -1.39803700 | -2.15519400 |
| H | 3.10354600 | -2.49535400 | -2.10588800 |
| H | 3.09284300 | -1.12226100 | -3.21821500 |
| H | 2.18026200 | -1.04013000 | -1.70629900 |
| H | 5.02650500 | -1.83633500 | 0.46923200  |
| H | 3.42169300 | -0.55789300 | 1.88049600  |
| H | 2.53766300 | -1.51283800 | 0.70435500  |
| H | 1.36939300 | 0.27076600  | -0.16303200 |

Coordinate III (cis)

|    |            |             |             |
|----|------------|-------------|-------------|
| Fe | 1.48645100 | 0.04025400  | 0.23873400  |
| N  | 2.68771000 | -1.26796800 | -0.70686200 |
| C  | 2.70030300 | -2.63620900 | -0.55706700 |
| C  | 3.65847700 | -3.21854700 | -1.46161800 |

|   |             |             |             |
|---|-------------|-------------|-------------|
| C | 4.21058300  | -2.19335800 | -2.16963500 |
| C | 3.59254700  | -0.97936200 | -1.70120700 |
| C | 3.85825800  | 0.28160400  | -2.21546100 |
| C | 3.24242400  | 1.45045100  | -1.79585600 |
| C | 3.55092100  | 2.76008300  | -2.31224900 |
| C | 2.78443400  | 3.64958100  | -1.62126700 |
| C | 2.00413000  | 2.88757700  | -0.67922800 |
| N | 2.28269800  | 1.54744400  | -0.81486900 |
| C | 1.13306800  | 3.44463100  | 0.24409000  |
| C | 0.40677200  | 2.72161900  | 1.17915300  |
| C | -0.52020100 | 3.30690800  | 2.11380900  |
| C | -1.06646900 | 2.28115500  | 2.82599900  |
| C | -0.47697100 | 1.06410600  | 2.32869600  |
| N | 0.43468100  | 1.35562000  | 1.33888700  |
| C | -0.81749500 | -0.20424500 | 2.77533600  |
| C | -0.28760900 | -1.38627800 | 2.27893200  |
| C | -0.60576300 | -2.69721600 | 2.78395600  |
| C | 0.15733600  | -3.58676700 | 2.08803600  |
| C | 0.94568700  | -2.82399200 | 1.15471100  |
| C | 1.89675100  | -3.36847500 | 0.30459000  |
| H | 2.02472500  | -4.44558900 | 0.31772500  |
| N | 0.64046600  | -1.48630400 | 1.26746700  |
| H | 0.20290500  | -4.66320200 | 2.19087900  |
| H | -1.31651700 | -2.89185600 | 3.57658100  |
| H | -1.55056900 | -0.27640600 | 3.57151600  |
| H | -1.80834300 | 2.32430800  | 3.61283900  |
| H | -0.72048000 | 4.36746000  | 2.19397400  |
| H | 1.01147300  | 4.52246900  | 0.23595700  |
| H | 2.74341400  | 4.72658600  | -1.72009100 |
| H | 4.27038800  | 2.95431500  | -3.09715200 |
| H | 4.60116300  | 0.35789400  | -3.00215700 |

|   |             |             |             |
|---|-------------|-------------|-------------|
| H | 4.96024900  | -2.23694500 | -2.94903100 |
| H | 3.86081900  | -4.27894900 | -1.53872400 |
| S | 3.22371500  | 0.13624100  | 1.81719700  |
| H | 2.66900500  | 1.02406600  | 2.67054800  |
| O | 0.18657800  | -0.10568700 | -1.00449100 |
| H | -0.40924600 | -0.82286300 | -0.71970600 |
| C | -3.26387700 | 1.19504900  | -1.62028700 |
| C | -4.16603600 | 0.17793100  | -2.34485800 |
| C | -4.38927100 | -1.11249900 | -1.47321800 |
| C | -5.48364700 | -0.25080000 | -0.72944600 |
| C | -5.64829200 | 0.54806000  | -2.05825400 |
| H | -5.88832500 | 1.61273800  | -1.96554000 |
| H | -6.35105300 | 0.08424200  | -2.75321300 |
| C | -4.83378900 | 0.67743900  | 0.28632500  |
| C | -3.74130900 | 1.41086100  | -0.20787800 |
| H | -3.21428600 | 2.11469400  | 0.43312100  |
| C | -5.30555100 | 0.78239300  | 1.57923100  |
| H | -4.84314900 | 1.45806700  | 2.29442600  |
| H | -6.15427800 | 0.19835500  | 1.92275300  |
| H | -6.35077800 | -0.77644500 | -0.31534200 |
| C | -5.01451600 | -2.25892700 | -2.28487900 |
| H | -5.36268300 | -3.05571100 | -1.61533000 |
| H | -4.26844000 | -2.69666600 | -2.96050000 |
| H | -5.86626500 | -1.94394400 | -2.89453000 |
| C | -3.21836300 | -1.68510600 | -0.66892900 |
| H | -2.46735500 | -2.11364200 | -1.34663000 |
| H | -3.56325500 | -2.49530000 | -0.01351700 |
| H | -2.72864700 | -0.93914300 | -0.03728000 |
| H | -3.85423900 | 0.03342800  | -3.38600600 |
| H | -3.26644700 | 2.14837700  | -2.17388600 |
| H | -2.21366800 | 0.86116100  | -1.61953100 |

Coordinate V

|    |             |             |             |
|----|-------------|-------------|-------------|
| Fe | -1.69311300 | 0.05888800  | 0.39213000  |
| N  | -0.21677700 | -0.55247500 | 1.63078300  |
| C  | 0.05827400  | -1.85265800 | 2.01293600  |
| C  | 1.03268100  | -1.86832500 | 3.06987300  |
| C  | 1.33768900  | -0.56859400 | 3.34772500  |
| C  | 0.55129900  | 0.24441400  | 2.45969600  |
| C  | 0.56025700  | 1.63027000  | 2.45611200  |
| C  | -0.20676900 | 2.41938000  | 1.61247100  |
| C  | -0.15454600 | 3.85563700  | 1.58621000  |
| C  | -1.01564800 | 4.26593200  | 0.61169200  |
| C  | -1.59618100 | 3.08120000  | 0.04115800  |
| N  | -1.10177800 | 1.95372300  | 0.66824000  |
| C  | -2.50077900 | 3.08764800  | -1.00934600 |
| C  | -3.03598400 | 1.94935400  | -1.59090300 |
| C  | -3.97094100 | 1.96370900  | -2.68500000 |
| C  | -4.28166500 | 0.66492300  | -2.95584200 |
| C  | -3.53641100 | -0.14453900 | -2.02811500 |
| N  | -2.76812400 | 0.65240100  | -1.20388000 |
| C  | -3.60260200 | -1.52776900 | -1.97576900 |
| C  | -2.88114900 | -2.31669000 | -1.09296400 |
| C  | -2.92312100 | -3.75355800 | -1.07627400 |
| C  | -2.05734900 | -4.16398800 | -0.10590200 |
| C  | -1.48486200 | -2.97849400 | 0.47177500  |
| C  | -0.53005700 | -2.98740400 | 1.47745600  |
| H  | -0.21756200 | -3.95005000 | 1.86775500  |
| N  | -2.00320700 | -1.85070100 | -0.13405100 |
| H  | -1.81048500 | -5.17359200 | 0.19582700  |
| H  | -3.53350800 | -4.35666600 | -1.73574800 |
| H  | -4.25421600 | -2.02935800 | -2.68332400 |



|   |             |             |             |
|---|-------------|-------------|-------------|
| H | -4.95126900 | 0.27334900  | -3.71057500 |
| H | -4.33201200 | 2.86077700  | -3.17101900 |
| H | -2.80125100 | 4.04965500  | -1.41059100 |
| H | -1.24014400 | 5.27451400  | 0.28976300  |
| H | 0.47386900  | 4.45782100  | 2.22939100  |
| H | 1.21843000  | 2.13283300  | 3.15677900  |
| H | 2.02759100  | -0.17969300 | 4.08528700  |
| H | 1.42067000  | -2.76648400 | 3.53246600  |
| S | -3.54260400 | 0.06566400  | 2.04851100  |
| H | -3.49070700 | 1.38926400  | 2.31720300  |
| C | 3.12433500  | 1.15058700  | -1.48698900 |
| C | 4.66330800  | 1.21510600  | -1.45465900 |
| C | 5.24664100  | 0.32329900  | -0.30056300 |
| C | 5.05613600  | -0.87614000 | -1.31746300 |
| C | 5.23916600  | 0.17353100  | -2.45826800 |
| H | 4.70176500  | 0.01024300  | -3.39766600 |
| H | 6.29043000  | 0.34718700  | -2.69248200 |
| C | 3.61986100  | -1.34380200 | -1.28290000 |
| C | 2.62811400  | -0.29247500 | -1.78487100 |
| H | 2.57584000  | -0.40161100 | -2.87468000 |
| C | 3.23524100  | -2.55173900 | -0.85948400 |
| H | 2.18676900  | -2.83436400 | -0.82884700 |
| H | 3.95901500  | -3.29349800 | -0.52983900 |
| H | 5.76214600  | -1.71087500 | -1.24598600 |
| C | 6.73161800  | 0.61934600  | -0.03164500 |
| H | 7.17036000  | -0.16701800 | 0.59522100  |
| H | 6.83462100  | 1.56938400  | 0.50807900  |
| H | 7.33333500  | 0.69141100  | -0.94204700 |
| C | 4.52501700  | 0.26677800  | 1.04730300  |
| H | 4.57954200  | 1.24007900  | 1.55192800  |
| H | 5.00393500  | -0.47155900 | 1.70315000  |

|   |            |             |             |
|---|------------|-------------|-------------|
| H | 3.47196500 | -0.01129100 | 0.96911900  |
| H | 5.02314900 | 2.24908700  | -1.51299800 |
| H | 2.72949800 | 1.82381300  | -2.25728800 |
| H | 2.70607100 | 1.48968700  | -0.53089200 |
| O | 1.28242800 | -0.51423500 | -1.37044600 |
| H | 1.24509600 | -0.51114800 | -0.39832200 |

Coordinate I (trans)

|    |             |             |             |
|----|-------------|-------------|-------------|
| Fe | 1.50148200  | -0.00305600 | 0.12354000  |
| N  | 1.52142100  | -1.96813400 | 0.58106100  |
| C  | 1.02598600  | -2.55437800 | 1.71881500  |
| C  | 1.13854600  | -3.99054700 | 1.63803700  |
| C  | 1.70154100  | -4.27008700 | 0.43036700  |
| C  | 1.93323500  | -3.00320900 | -0.21988600 |
| C  | 2.50829200  | -2.85645400 | -1.47833300 |
| C  | 2.77119800  | -1.64599300 | -2.11141300 |
| C  | 3.40142400  | -1.51890000 | -3.40308200 |
| C  | 3.48582000  | -0.18567400 | -3.66547700 |
| C  | 2.90487300  | 0.49573300  | -2.53393200 |
| N  | 2.48093300  | -0.40911200 | -1.59321200 |
| C  | 2.78794300  | 1.87718200  | -2.42359100 |
| C  | 2.23472200  | 2.56310200  | -1.34654900 |
| C  | 2.13619700  | 4.00002000  | -1.25975000 |
| C  | 1.54130900  | 4.27778300  | -0.06679300 |
| C  | 1.28020300  | 3.00905300  | 0.56859800  |
| N  | 1.71073900  | 1.97585600  | -0.22376600 |
| C  | 0.68625800  | 2.86138000  | 1.81822300  |
| C  | 0.44643800  | 1.65144000  | 2.46237300  |
| C  | -0.14513800 | 1.52736000  | 3.77251700  |
| C  | -0.19806700 | 0.19512100  | 4.05039800  |

|   |             |             |             |
|---|-------------|-------------|-------------|
| C | 0.36029900  | -0.48647700 | 2.90779900  |
| C | 0.48431600  | -1.86836000 | 2.80062000  |
| H | 0.12828600  | -2.46331400 | 3.63580100  |
| N | 0.75038000  | 0.41572100  | 1.95185700  |
| H | -0.57249500 | -0.29711900 | 4.93826800  |
| H | -0.46528300 | 2.36023400  | 4.38451900  |
| H | 0.39392100  | 3.76748600  | 2.33940300  |
| H | 1.29801400  | 5.24157500  | 0.36073500  |
| H | 2.48376500  | 4.68766000  | -2.01938600 |
| H | 3.16386600  | 2.47287400  | -3.24946500 |
| H | 3.89848400  | 0.30854800  | -4.53514600 |
| H | 3.73111100  | -2.35118800 | -4.01086500 |
| H | 2.78750900  | -3.76305500 | -2.00574500 |
| H | 1.94729000  | -5.23398000 | 0.00454400  |
| H | 0.82332800  | -4.67667100 | 2.41302200  |
| S | 3.78701500  | 0.12455200  | 1.20665200  |
| H | 4.30560200  | -1.00989800 | 0.68719500  |
| O | 0.02635200  | -0.07796000 | -0.58453100 |
| C | -4.00819500 | 1.45258900  | -1.54116700 |
| C | -4.67359400 | 0.16208100  | -2.04934800 |
| C | -3.81944000 | -1.06062800 | -1.60874300 |
| C | -4.58712200 | -0.98303000 | -0.25237700 |
| C | -5.78448200 | -0.33235800 | -1.05620900 |
| C | -3.94137800 | 0.06038000  | 0.62563900  |
| C | -3.35006000 | 1.23663200  | -0.14638200 |
| H | -3.39258200 | 2.15122900  | 0.45605200  |
| C | -3.88051100 | -0.04338000 | 1.95861800  |
| H | -3.43414900 | 0.73420700  | 2.57544400  |
| H | -4.27173000 | -0.91496900 | 2.47941100  |
| H | -4.79711200 | -1.91026800 | 0.29304800  |
| H | -4.95680400 | 0.24578800  | -3.10587500 |

|   |             |             |             |
|---|-------------|-------------|-------------|
| H | -4.74955400 | 2.25954800  | -1.50181500 |
| H | -3.23976700 | 1.77384400  | -2.25542600 |
| H | -2.28421800 | 1.02338900  | -0.29933900 |
| H | -4.05269900 | -1.96965900 | -2.16647300 |
| H | -2.73191900 | -0.93620000 | -1.57915600 |
| C | -6.66651700 | 0.69768500  | -0.34539500 |
| H | -7.32657400 | 1.19986900  | -1.06479300 |
| H | -7.30619100 | 0.20239300  | 0.39668200  |
| H | -6.09544500 | 1.46682600  | 0.18070500  |
| C | -6.69678400 | -1.39601000 | -1.68744800 |
| H | -7.30254500 | -1.88914100 | -0.91653100 |
| H | -7.38646400 | -0.92814800 | -2.40192100 |
| H | -6.14541900 | -2.17420400 | -2.22347700 |

Coordinate II (trans) – TS (-1823.33)

|    |             |             |             |
|----|-------------|-------------|-------------|
| Fe | -1.28190100 | -0.00908700 | 0.19898600  |
| N  | -2.16931200 | 1.02573700  | -1.28449900 |
| C  | -2.16472500 | 2.38949800  | -1.44042700 |
| C  | -2.85579600 | 2.76130100  | -2.65367600 |
| C  | -3.27877100 | 1.60381600  | -3.23195900 |
| C  | -2.83956700 | 0.52936800  | -2.37236500 |
| C  | -3.05575200 | -0.82402800 | -2.62033000 |
| C  | -2.62970500 | -1.87424300 | -1.81081400 |
| C  | -2.85077800 | -3.27348100 | -2.09278000 |
| C  | -2.26657600 | -3.97057100 | -1.07979500 |
| C  | -1.69549300 | -2.99408200 | -0.18091900 |
| N  | -1.93061200 | -1.72276200 | -0.64144500 |
| C  | -1.01498600 | -3.30785100 | 0.99166000  |
| C  | -0.48791600 | -2.39831900 | 1.90865400  |
| C  | 0.14368800  | -2.76959400 | 3.15335700  |
| C  | 0.47443700  | -1.60747900 | 3.78269600  |

|   |             |             |             |
|---|-------------|-------------|-------------|
| C | 0.05141200  | -0.53532500 | 2.91345000  |
| N | -0.52929400 | -1.03616100 | 1.77724400  |
| C | 0.21695800  | 0.82065900  | 3.18816700  |
| C | -0.15670700 | 1.86912100  | 2.34986500  |
| C | 0.05670600  | 3.26752100  | 2.63821900  |
| C | -0.43395100 | 3.96175800  | 1.57312100  |
| C | -0.95285200 | 2.98222200  | 0.64718400  |
| C | -1.58822600 | 3.29467000  | -0.55465400 |
| H | -1.66159600 | 4.34722400  | -0.81109600 |
| N | -0.76911800 | 1.71572200  | 1.13303600  |
| H | -0.45985600 | 5.03239400  | 1.41763700  |
| H | 0.52071600  | 3.64867100  | 3.53851000  |
| H | 0.69038500  | 1.08234200  | 4.12950600  |
| H | 0.95838000  | -1.47118000 | 4.74094300  |
| H | 0.29667200  | -3.78723300 | 3.48819500  |
| H | -0.90505200 | -4.36189900 | 1.22785600  |
| H | -2.21912300 | -5.04209900 | -0.93568000 |
| H | -3.38220700 | -3.65198700 | -2.95615000 |
| H | -3.59850700 | -1.08255300 | -3.52433600 |
| H | -3.83354600 | 1.47040300  | -4.15144700 |
| H | -2.99152700 | 3.77804500  | -2.99851800 |
| S | -3.41326300 | 0.09544900  | 1.43754600  |
| H | -4.24984000 | -0.20232900 | 0.41861500  |
| O | 0.20195300  | -0.09436300 | -0.71857200 |
| C | 3.12057900  | -1.11815900 | 0.35781500  |
| C | 3.98135400  | -1.42950400 | -0.87868000 |
| C | 3.28505000  | -0.83276400 | -2.13427900 |
| C | 3.98570900  | 0.51003900  | -1.76155900 |
| C | 5.11368800  | -0.35848700 | -1.07121500 |
| C | 3.17152500  | 1.21027900  | -0.69772400 |
| C | 2.52645600  | 0.29859600  | 0.27535300  |

|   |            |             |             |
|---|------------|-------------|-------------|
| H | 2.31483000 | 0.75921700  | 1.24317600  |
| C | 3.03864200 | 2.55249900  | -0.64502900 |
| H | 2.46450600 | 3.03868500  | 0.14063900  |
| H | 3.50343300 | 3.19796300  | -1.38628100 |
| H | 4.29248300 | 1.19107900  | -2.56304200 |
| H | 4.28433900 | -2.48332200 | -0.89930700 |
| H | 3.71848700 | -1.22281900 | 1.27378300  |
| H | 2.31160400 | -1.85567100 | 0.43739000  |
| H | 1.32547400 | 0.13440800  | -0.17375600 |
| H | 3.65731300 | -1.25034400 | -3.07174000 |
| H | 2.19094300 | -0.83637000 | -2.14878300 |
| C | 5.82594900 | 0.20740800  | 0.16035000  |
| H | 6.44355700 | -0.56672600 | 0.63409100  |
| H | 6.49426100 | 1.02837700  | -0.13014100 |
| H | 5.13970600 | 0.59782800  | 0.91629800  |
| C | 6.18062900 | -0.81641600 | -2.07800600 |
| H | 6.82079000 | 0.02626200  | -2.36846400 |
| H | 6.82477300 | -1.58131100 | -1.62544800 |
| H | 5.75709100 | -1.24151500 | -2.99267800 |

Coordinate III (trans)

|    |             |             |             |
|----|-------------|-------------|-------------|
| Fe | -1.45890100 | 0.02709200  | 0.15179600  |
| N  | -1.67982300 | 1.93069700  | -0.45795800 |
| C  | -1.26014800 | 3.06406000  | 0.20157700  |
| C  | -1.53681700 | 4.22880800  | -0.60033900 |
| C  | -2.10705200 | 3.78830100  | -1.75659100 |
| C  | -2.18354800 | 2.35227700  | -1.66627300 |
| C  | -2.67283700 | 1.53248000  | -2.67275300 |
| C  | -2.72638000 | 0.14868600  | -2.60589000 |
| C  | -3.27433400 | -0.69349200 | -3.63944000 |
| C  | -3.19832000 | -1.97624800 | -3.18689500 |

|   |             |             |             |
|---|-------------|-------------|-------------|
| C | -2.60231300 | -1.92375700 | -1.87551000 |
| N | -2.30545000 | -0.62122900 | -1.54742000 |
| C | -2.39554300 | -3.03116400 | -1.06769400 |
| C | -1.84696000 | -2.98866600 | 0.20627300  |
| C | -1.59867500 | -4.15016300 | 1.02176300  |
| C | -1.00984400 | -3.71060800 | 2.16942900  |
| C | -0.89679100 | -2.27841200 | 2.06127500  |
| N | -1.42790800 | -1.85632700 | 0.86398600  |
| C | -0.30973000 | -1.46782000 | 3.02189500  |
| C | -0.17016700 | -0.09146600 | 2.91803300  |
| C | 0.38056200  | 0.74974100  | 3.94965600  |
| C | 0.28422000  | 2.03575800  | 3.50691600  |
| C | -0.32232000 | 1.98538500  | 2.20115400  |
| C | -0.63474600 | 3.10154300  | 1.43874000  |
| H | -0.37077200 | 4.07450000  | 1.83915800  |
| N | -0.57000600 | 0.67865700  | 1.84954200  |
| H | 0.58125000  | 2.94716700  | 4.00942100  |
| H | 0.77383600  | 0.38662700  | 4.89033200  |
| H | 0.06025400  | -1.94415600 | 3.92347400  |
| H | -0.66828600 | -4.28862500 | 3.01831000  |
| H | -1.84056800 | -5.16445000 | 0.73173500  |
| H | -2.68115100 | -4.00132500 | -1.46002100 |
| H | -3.51706200 | -2.88641800 | -3.67827900 |
| H | -3.66877500 | -0.33027500 | -4.57961900 |
| H | -3.04218100 | 2.00836400  | -3.57480800 |
| H | -2.44279400 | 4.36615700  | -2.60788700 |
| H | -1.30605600 | 5.24391800  | -0.30412500 |
| S | -3.55716600 | 0.15054700  | 1.21660700  |
| H | -3.86520000 | 1.42762000  | 0.90312300  |
| O | 0.15255200  | -0.13704200 | -0.62672000 |
| C | 3.53926400  | -1.66816700 | -0.07947400 |

|   |            |             |             |
|---|------------|-------------|-------------|
| C | 4.28570300 | -1.32858300 | -1.38361500 |
| C | 3.54654000 | -0.15042600 | -2.07751800 |
| C | 4.36686100 | 0.78363400  | -1.13638500 |
| C | 5.47893300 | -0.33844000 | -1.11794300 |
| C | 3.64897700 | 0.83788000  | 0.20365900  |
| C | 3.21762300 | -0.41097200 | 0.68786700  |
| H | 2.71147500 | -0.48558800 | 1.64880400  |
| C | 3.45104100 | 2.02855800  | 0.87511300  |
| H | 2.93465800 | 2.05743800  | 1.83100600  |
| H | 3.80453300 | 2.97176800  | 0.46926800  |
| H | 4.65209000 | 1.77911200  | -1.49293500 |
| H | 4.50050900 | -2.23032400 | -1.96892300 |
| H | 4.13456700 | -2.35239300 | 0.54590900  |
| H | 2.61377100 | -2.21721600 | -0.31523500 |
| H | 0.85450300 | 0.08872000  | 0.01445300  |
| H | 3.81410900 | -0.03579300 | -3.12969100 |
| H | 2.45678700 | -0.11678600 | -1.97764100 |
| C | 6.33654000 | -0.51915700 | 0.13783800  |
| H | 6.93575400 | -1.43572300 | 0.06102300  |
| H | 7.03531800 | 0.32060500  | 0.24597200  |
| H | 5.74754500 | -0.57867200 | 1.05648100  |
| C | 6.42135900 | -0.23079400 | -2.32796400 |
| H | 7.10338400 | 0.62030400  | -2.20629900 |
| H | 7.03477100 | -1.13702300 | -2.41231900 |
| H | 5.89509500 | -0.09957700 | -3.27781400 |

Coordinate V (trans)

|    |            |             |            |
|----|------------|-------------|------------|
| Fe | 1.47893300 | -0.04784500 | 0.22564300 |
| N  | 0.87630600 | -1.60018500 | 1.35522800 |
| C  | 0.44222300 | -1.55333200 | 2.66232500 |
| C  | 0.22090600 | -2.88559900 | 3.16268900 |



|   |             |             |             |
|---|-------------|-------------|-------------|
| C | 0.53318200  | -3.74426400 | 2.15146200  |
| C | 0.94730800  | -2.93771100 | 1.03224900  |
| C | 1.37240300  | -3.45003000 | -0.18467200 |
| C | 1.78030500  | -2.68045500 | -1.26472300 |
| C | 2.18952200  | -3.22157000 | -2.53331700 |
| C | 2.47943000  | -2.16174900 | -3.34110500 |
| C | 2.24653500  | -0.97075400 | -2.56835700 |
| N | 1.83012100  | -1.30213400 | -1.29534300 |
| C | 2.39796300  | 0.31739300  | -3.06192300 |
| C | 2.13591700  | 1.47439300  | -2.34356900 |
| C | 2.30693300  | 2.80729100  | -2.85919700 |
| C | 1.98024100  | 3.66652600  | -1.85222300 |
| C | 1.60980100  | 2.86060300  | -0.71871500 |
| N | 1.69376300  | 1.52049200  | -1.03725900 |
| C | 1.24124600  | 3.36999000  | 0.51771600  |
| C | 0.90081300  | 2.59832600  | 1.62040400  |
| C | 0.49293500  | 3.14003000  | 2.88906600  |
| C | 0.21766600  | 2.08063000  | 3.70292000  |
| C | 0.45538900  | 0.88918600  | 2.93321800  |
| C | 0.25265200  | -0.39903400 | 3.40753500  |
| H | -0.08939300 | -0.51018200 | 4.43109400  |
| N | 0.88087300  | 1.21893600  | 1.66210700  |
| H | -0.12459600 | 2.08966400  | 4.72965500  |
| H | 0.42361800  | 4.19708800  | 3.11092500  |
| H | 1.21448400  | 4.44859600  | 0.63112100  |
| H | 1.98717000  | 4.74883500  | -1.85953200 |
| H | 2.63715300  | 3.03911800  | -3.86354600 |
| H | 2.73825900  | 0.42620900  | -4.08631700 |
| H | 2.81094500  | -2.16919100 | -4.37138700 |
| H | 2.23461900  | -4.27809300 | -2.76381500 |
| H | 1.38161500  | -4.52842200 | -0.30284600 |

|   |             |             |             |
|---|-------------|-------------|-------------|
| H | 0.49434200  | -4.82591500 | 2.14748900  |
| H | -0.12767100 | -3.11609800 | 4.16111600  |
| S | 3.85294000  | -0.03812300 | 1.05586200  |
| H | 4.28988600  | -1.03556000 | 0.25536200  |
| C | -2.80352200 | -1.06486100 | 0.26505700  |
| C | -3.99687500 | -1.33326200 | -0.66747000 |
| C | -5.11445700 | -0.24453600 | -0.49020500 |
| C | -4.23048500 | 0.62430100  | -1.47500600 |
| C | -3.70190400 | -0.71983500 | -2.06485800 |
| H | -2.66593300 | -0.73845400 | -2.41187600 |
| H | -4.35108000 | -1.11063800 | -2.85052800 |
| C | -3.12804300 | 1.29175700  | -0.69597500 |
| C | -2.18291400 | 0.33477300  | 0.03358200  |
| C | -2.94977900 | 2.61634900  | -0.62707700 |
| H | -2.16498600 | 3.05799300  | -0.01538300 |
| H | -3.58232200 | 3.30671600  | -1.18047200 |
| H | -4.75417700 | 1.32769200  | -2.13188100 |
| C | -6.44429300 | -0.66495000 | -1.13511700 |
| H | -7.12469300 | 0.19303900  | -1.20547100 |
| H | -6.93690800 | -1.42956000 | -0.52085600 |
| H | -6.32491800 | -1.07709600 | -2.14133100 |
| C | -5.41103500 | 0.30696100  | 0.90713400  |
| H | -5.87174000 | -0.46702100 | 1.53444700  |
| H | -6.11914700 | 1.14307600  | 0.84294000  |
| H | -4.52337200 | 0.67489900  | 1.42887900  |
| H | -4.31256900 | -2.38189100 | -0.61253100 |
| H | -2.01619100 | -1.80726300 | 0.09514600  |
| H | -3.11083400 | -1.16578700 | 1.31206300  |
| H | -1.87378600 | 0.77819700  | 0.98730400  |
| O | -0.98841900 | 0.13980900  | -0.77221300 |
| H | -0.73753500 | 1.00632100  | -1.13679300 |

# Delta Site – Sextet state

## Coordinate I (cis)

|    |             |             |             |
|----|-------------|-------------|-------------|
| Fe | -1.41563300 | 0.01315200  | 0.11997500  |
| N  | -0.80922400 | -0.82611200 | 1.92806100  |
| C  | -0.64446700 | -2.15569800 | 2.19524600  |
| C  | -0.11328300 | -2.31794100 | 3.53301900  |
| C  | 0.03425500  | -1.06440400 | 4.05329900  |
| C  | -0.40653700 | -0.13359500 | 3.03513600  |
| C  | -0.42558700 | 1.26435700  | 3.15844600  |
| C  | -0.85700200 | 2.21022900  | 2.21655200  |
| C  | -0.86758900 | 3.64673900  | 2.40326800  |
| C  | -1.35992000 | 4.19151800  | 1.25288100  |
| C  | -1.65224600 | 3.08963500  | 0.35922700  |
| N  | -1.33869000 | 1.90961700  | 0.97311500  |
| C  | -2.18930400 | 3.19760500  | -0.93267300 |
| C  | -2.51638000 | 2.15880700  | -1.81794700 |
| C  | -3.09484900 | 2.31823000  | -3.13593800 |
| C  | -3.25915000 | 1.06431500  | -3.64947500 |
| C  | -2.78116500 | 0.13448300  | -2.64723600 |
| N  | -2.34407200 | 0.82867200  | -1.55374500 |
| C  | -2.76350800 | -1.26332300 | -2.76925300 |
| C  | -2.31947300 | -2.20798500 | -1.83146200 |
| C  | -2.34692000 | -3.64621700 | -2.00309400 |
| C  | -1.83845000 | -4.18990300 | -0.85921500 |
| C  | -1.49887600 | -3.08496200 | 0.01393900  |
| C  | -0.95971800 | -3.19396500 | 1.30494900  |
| H  | -0.77391500 | -4.20277300 | 1.66221800  |
| N  | -1.80124600 | -1.90512000 | -0.60405300 |
| H  | -1.70554200 | -5.23626000 | -0.61671900 |

|   |             |             |             |
|---|-------------|-------------|-------------|
| H | -2.71276900 | -4.15920000 | -2.88295300 |
| H | -3.14734200 | -1.66397700 | -3.70322300 |
| H | -3.66503600 | 0.78318100  | -4.61249700 |
| H | -3.34036100 | 3.26702500  | -3.59496700 |
| H | -2.38634100 | 4.20571600  | -1.28581200 |
| H | -1.51786800 | 5.23686100  | 1.02131100  |
| H | -0.54175000 | 4.15809000  | 3.29966700  |
| H | -0.06864500 | 1.66296200  | 4.10388400  |
| H | 0.40154600  | -0.78472800 | 5.03209300  |
| H | 0.10821100  | -3.26777000 | 4.00202900  |
| O | 0.09868300  | 0.09294500  | -0.51778700 |
| S | -3.71437500 | -0.11392600 | 1.10714500  |
| H | -4.17680000 | 1.06867700  | 0.64645200  |
| C | 3.77994500  | -0.63085400 | -2.19214700 |
| C | 5.11503500  | 0.10602700  | -1.99355600 |
| C | 5.06412400  | 1.04508700  | -0.73651300 |
| C | 5.39073800  | -0.26485700 | 0.08804500  |
| C | 6.08789300  | -0.80847500 | -1.19779500 |
| H | 6.03617200  | -1.88677000 | -1.38274300 |
| H | 7.13067600  | -0.49359100 | -1.27058700 |
| C | 4.12091900  | -1.04148800 | 0.33196500  |
| C | 3.40834900  | -1.48602500 | -0.94390200 |
| H | 3.69858400  | -2.52714100 | -1.13916100 |
| H | 2.32417500  | -1.49541200 | -0.79021300 |
| C | 3.66845600  | -1.33144100 | 1.55719600  |
| H | 2.73902300  | -1.87567700 | 1.71383700  |
| H | 4.21953100  | -1.04110700 | 2.44934800  |
| H | 5.98346700  | -0.14479900 | 1.00215600  |
| C | 6.23165500  | 2.04428200  | -0.70971300 |
| H | 6.30664200  | 2.52095400  | 0.27599000  |
| H | 6.06833700  | 2.83809300  | -1.45012100 |

|   |            |             |             |
|---|------------|-------------|-------------|
| H | 7.19945500 | 1.58345000  | -0.92919500 |
| C | 3.77235900 | 1.80466100  | -0.42113300 |
| H | 3.59023500 | 2.57956300  | -1.17755900 |
| H | 3.85699400 | 2.30916000  | 0.55041900  |
| H | 2.88887100 | 1.16258100  | -0.37924600 |
| H | 5.46941700 | 0.55255500  | -2.93087200 |
| H | 3.85153100 | -1.28497800 | -3.06988700 |
| H | 2.98728800 | 0.09416700  | -2.41134300 |

Coordinate (cis) – TS (-1896.64)

|    |             |             |             |
|----|-------------|-------------|-------------|
| Fe | 1.21189900  | 0.02333000  | 0.20323800  |
| N  | 0.33919400  | 0.21406400  | 2.08228300  |
| C  | 0.06834500  | 1.38781200  | 2.72532800  |
| C  | -0.54323200 | 1.10618600  | 4.00860400  |
| C  | -0.61902200 | -0.25286600 | 4.11978600  |
| C  | -0.05733300 | -0.80387200 | 2.90301400  |
| C  | 0.07203000  | -2.17344900 | 2.60840000  |
| C  | 0.62097200  | -2.76565800 | 1.45883800  |
| C  | 0.73271700  | -4.18778400 | 1.19715500  |
| C  | 1.33431000  | -4.31671000 | -0.02226000 |
| C  | 1.59422000  | -2.97287500 | -0.50379400 |
| N  | 1.14686000  | -2.06766700 | 0.41094400  |
| C  | 2.23184900  | -2.63242600 | -1.71047000 |
| C  | 2.54578500  | -1.35379000 | -2.19949100 |
| C  | 3.22295700  | -1.07238300 | -3.45056400 |
| C  | 3.32811500  | 0.28463700  | -3.54772500 |
| C  | 2.71495600  | 0.83962900  | -2.35687900 |
| N  | 2.25770500  | -0.17627200 | -1.56569200 |
| C  | 2.60402000  | 2.20743800  | -2.05265600 |
| C  | 2.03030800  | 2.79900500  | -0.91494800 |

|   |             |              |             |
|---|-------------|--------------|-------------|
| C | 1.94652400  | 4.22044100   | -0.63715100 |
| C | 1.31681100  | 4.34971200   | 0.56701200  |
| C | 1.01468700  | 3.00765700   | 1.02844400  |
| C | 0.36822100  | 2.66948100   | 2.22740300  |
| H | 0.07583700  | 3.50212000   | 2.86150400  |
| N | 1.46250100  | 2.10112900   | 0.11041600  |
| H | 1.07565800  | 5.26031700   | 1.10017000  |
| H | 2.32275900  | 5.00386300   | -1.28235700 |
| H | 3.01725400  | 2.89155200   | -2.78870100 |
| H | 3.77657500  | 0.86568600   | -4.34315400 |
| H | 3.56769900  | -1.82163300  | -4.15150900 |
| H | 2.53245900  | -3.46506100  | -2.34072400 |
| H | 1.58685900  | -5.22771600  | -0.54937700 |
| H | 0.39487600  | -4.97218200  | 1.86210700  |
| H | -0.29651700 | -2.85774500  | 3.36771700  |
| H | -1.01122200 | -0.83600900  | 4.94294000  |
| H | -0.86029600 | 1.85432100   | 4.72363200  |
| S | 3.34257800  | -0.04851900  | 1.40041100  |
| H | 4.11277800  | 0.54492800   | 0.46176600  |
| O | -0.29207700 | 0.09659100   | -0.69120900 |
| C | -3.26118400 | 0.42753000   | 0.83886800  |
| C | -4.58583300 | 0.74413400   | 0.12144700  |
| C | -4.40320000 | 0.83155400   | -1.43602600 |
| C | -4.49467700 | -0.74204000  | -1.39922800 |
| C | -5.35500200 | -0.58478600  | -0.10347000 |
| H | -5.24505000 | -1.36291800  | 0.65999100  |
| H | -6.41673800 | -0.444444200 | -0.31444400 |
| C | -3.19309900 | -1.38688200  | -0.97688800 |
| C | -2.52733000 | -0.76289800  | 0.19474400  |
| H | -2.14544700 | -1.49482900  | 0.91108900  |
| C | -2.70868200 | -2.48968300  | -1.58516600 |

|   |             |             |             |
|---|-------------|-------------|-------------|
| H | -1.79745600 | -2.97673100 | -1.24512700 |
| H | -3.21630800 | -2.93649200 | -2.43624000 |
| H | -4.93456400 | -1.24490400 | -2.26751500 |
| C | -5.63252600 | 1.44895500  | -2.12521800 |
| H | -5.57788400 | 1.29648500  | -3.21059800 |
| H | -5.66255900 | 2.53094000  | -1.94384900 |
| H | -6.58235900 | 1.03033200  | -1.78011000 |
| C | -3.15357300 | 1.49822800  | -2.01775800 |
| H | -3.19370500 | 2.58341900  | -1.85291600 |
| H | -3.11215800 | 1.33733900  | -3.10338000 |
| H | -2.21710200 | 1.13132600  | -1.59318000 |
| H | -5.10976300 | 1.57346800  | 0.61209600  |
| H | -3.47138600 | 0.20087400  | 1.89283300  |
| H | -2.61495400 | 1.31522800  | 0.84445000  |
| H | -1.36793000 | -0.32912100 | -0.21996000 |

Coordinate III (cis)

|    |            |             |             |
|----|------------|-------------|-------------|
| Fe | 1.17240200 | 0.04266800  | -0.03596400 |
| N  | 0.99719100 | -1.75620200 | 1.01870500  |
| C  | 0.12944400 | -2.00780700 | 2.05921400  |
| C  | 0.08490100 | -3.42594700 | 2.32244900  |
| C  | 0.93364200 | -4.02323300 | 1.43525700  |
| C  | 1.50666000 | -2.97346500 | 0.62755300  |
| C  | 2.45801400 | -3.16499400 | -0.37697700 |
| C  | 3.09174000 | -2.16873400 | -1.11533000 |
| C  | 4.08862400 | -2.39128100 | -2.13412700 |
| C  | 4.44151000 | -1.16707600 | -2.62473600 |
| C  | 3.66172500 | -0.18397500 | -1.91228500 |
| N  | 2.85735500 | -0.81381100 | -0.98415500 |
| C  | 3.70639000 | 1.19191900  | -2.12798200 |
| C  | 2.96559900 | 2.16167200  | -1.44694100 |

|   |             |             |             |
|---|-------------|-------------|-------------|
| C | 3.08265600  | 3.58662000  | -1.64754000 |
| C | 2.21937200  | 4.18345900  | -0.77425800 |
| C | 1.56940000  | 3.12638700  | -0.03657600 |
| N | 2.03492000  | 1.90513100  | -0.46837900 |
| C | 0.63605000  | 3.31638200  | 0.98270900  |
| C | 0.03493100  | 2.31929100  | 1.75297300  |
| C | -0.88187600 | 2.55353800  | 2.84364600  |
| C | -1.22153400 | 1.33037900  | 3.34731800  |
| C | -0.51478700 | 0.34309600  | 2.56597100  |
| C | -0.57788500 | -1.03716500 | 2.76765900  |
| H | -1.22250000 | -1.38689100 | 3.56815900  |
| N | 0.24216000  | 0.96753500  | 1.60305600  |
| H | -1.88066700 | 1.10691100  | 4.17639700  |
| H | -1.20649600 | 3.53010600  | 3.17943800  |
| H | 0.37107500  | 4.34255300  | 1.21836000  |
| H | 2.03931200  | 5.24076100  | -0.62771000 |
| H | 3.74942800  | 4.05839000  | -2.35790400 |
| H | 4.39608800  | 1.54689200  | -2.88763600 |
| H | 5.16266700  | -0.93965300 | -3.39937600 |
| H | 4.46458600  | -3.36291500 | -2.42814900 |
| H | 2.75122500  | -4.18982900 | -0.58330500 |
| H | 1.16835900  | -5.07545500 | 1.33789600  |
| H | -0.51353400 | -3.89246900 | 3.09445600  |
| S | 4.54762700  | -0.29752900 | 1.57590900  |
| H | 4.95573400  | 0.65656800  | 0.70993700  |
| O | -0.13824900 | -0.07180800 | -1.33158900 |
| H | -0.80070100 | -0.76620600 | -1.17815700 |
| C | -3.60890200 | 1.32372500  | -1.36546200 |
| C | -4.56781900 | 0.43059100  | -2.17539700 |
| C | -4.69844700 | -0.99977200 | -1.53356100 |
| C | -5.72434400 | -0.31133200 | -0.55008000 |



|   |             |             |             |
|---|-------------|-------------|-------------|
| C | -6.01901900 | 0.70775900  | -1.69263000 |
| H | -6.25684800 | 1.73271300  | -1.38823400 |
| H | -6.78075700 | 0.35877300  | -2.39260200 |
| C | -4.98768600 | 0.43538900  | 0.55258300  |
| C | -3.95067200 | 1.26966300  | 0.10095600  |
| H | -3.36909200 | 1.85781300  | 0.80805500  |
| C | -5.33645600 | 0.29610800  | 1.88090200  |
| H | -4.81237500 | 0.84258400  | 2.66097500  |
| H | -6.14547800 | -0.35947200 | 2.18933100  |
| H | -6.54476600 | -0.92314300 | -0.15990800 |
| C | -5.38798700 | -1.99773900 | -2.47826900 |
| H | -5.66615800 | -2.90958200 | -1.93467600 |
| H | -4.70503500 | -2.28936100 | -3.28651600 |
| H | -6.29523900 | -1.59938800 | -2.94141800 |
| C | -3.45322100 | -1.67850100 | -0.95453800 |
| H | -2.76516700 | -1.95947800 | -1.76374600 |
| H | -3.72906500 | -2.60220800 | -0.42964500 |
| H | -2.91525200 | -1.04592800 | -0.24300300 |
| H | -4.35457500 | 0.48160400  | -3.24963800 |
| H | -3.67370300 | 2.36064400  | -1.73426700 |
| H | -2.56106800 | 1.02291800  | -1.52348100 |

Coordinate V (cis)

|    |             |             |            |
|----|-------------|-------------|------------|
| Fe | 1.77992000  | -0.06959400 | 0.52495000 |
| N  | 0.13589700  | 0.57139600  | 1.66172000 |
| C  | -0.12500600 | 1.87541100  | 2.03005600 |
| C  | -1.09190500 | 1.89467300  | 3.09964300 |
| C  | -1.39977900 | 0.59482900  | 3.38467300 |
| C  | -0.62503200 | -0.22917700 | 2.48957200 |
| C  | -0.63996300 | -1.62339700 | 2.46352700 |
| C  | 0.10694100  | -2.44242000 | 1.61592200 |

|   |             |             |             |
|---|-------------|-------------|-------------|
| C | 0.02310200  | -3.88117300 | 1.56763700  |
| C | 0.87792100  | -4.29846300 | 0.58725400  |
| C | 1.49120700  | -3.11773100 | 0.03128700  |
| N | 1.01570500  | -1.99823800 | 0.67946100  |
| C | 2.40378700  | -3.10910900 | -1.02388300 |
| C | 2.97192600  | -1.98079600 | -1.61397300 |
| C | 3.89440300  | -1.99855800 | -2.72462500 |
| C | 4.21240100  | -0.70005100 | -2.99922200 |
| C | 3.48561500  | 0.11989500  | -2.05889100 |
| N | 2.73466900  | -0.68081200 | -1.22777100 |
| C | 3.53052900  | 1.51277700  | -2.00715300 |
| C | 2.81335800  | 2.33133700  | -1.13451500 |
| C | 2.83060600  | 3.77340500  | -1.14723100 |
| C | 1.96735200  | 4.19214300  | -0.17507300 |
| C | 1.41626900  | 3.00875600  | 0.43796300  |
| C | 0.46558500  | 3.00239000  | 1.45904400  |
| H | 0.14747500  | 3.96826900  | 1.83891800  |
| N | 1.95320600  | 1.88595000  | -0.15405700 |
| H | 1.71179800  | 5.20699500  | 0.10145400  |
| H | 3.42113300  | 4.37795300  | -1.82360700 |
| H | 4.16845200  | 2.00977600  | -2.73146500 |
| H | 4.87198200  | -0.32005000 | -3.76885100 |
| H | 4.24167000  | -2.89371200 | -3.22448400 |
| H | 2.68397500  | -4.07302700 | -1.43722600 |
| H | 1.07444100  | -5.31028900 | 0.25658200  |
| H | -0.61873000 | -4.48392100 | 2.19726600  |
| H | -1.30621500 | -2.11948900 | 3.16240600  |
| H | -2.08788600 | 0.21803200  | 4.13045700  |
| H | -1.47808500 | 2.79165400  | 3.56652900  |
| S | 3.56005200  | -0.06158400 | 2.12978100  |
| H | 3.48802200  | -1.38337700 | 2.40282200  |

|   |             |             |             |
|---|-------------|-------------|-------------|
| C | -2.98317900 | -1.13666400 | -1.48053600 |
| C | -4.52219900 | -1.21297800 | -1.48028700 |
| C | -5.13702900 | -0.31608600 | -0.34658600 |
| C | -4.93358800 | 0.87619900  | -1.36930900 |
| C | -5.08536000 | -0.18454500 | -2.50454600 |
| H | -4.53074000 | -0.02521900 | -3.43451800 |
| H | -6.13036300 | -0.36852700 | -2.75809700 |
| C | -3.50144500 | 1.35456700  | -1.30825800 |
| C | -2.49275400 | 0.30705900  | -1.78449600 |
| H | -2.43003600 | 0.40553500  | -2.87495200 |
| C | -3.13437400 | 2.56834700  | -0.88624700 |
| H | -2.08860800 | 2.85777100  | -0.83562000 |
| H | -3.86997800 | 3.30750800  | -0.57740500 |
| H | -5.64702100 | 1.70627500  | -1.31977400 |
| C | -6.62509200 | -0.62175900 | -0.10681600 |
| H | -7.08327600 | 0.16643800  | 0.50365100  |
| H | -6.73208100 | -1.56784400 | 0.43909200  |
| H | -7.20686400 | -0.70666300 | -1.02901000 |
| C | -4.44481900 | -0.24235000 | 1.01556800  |
| H | -4.49997600 | -1.21243500 | 1.52635000  |
| H | -4.94513400 | 0.49567000  | 1.65567800  |
| H | -3.39348600 | 0.04621700  | 0.95729400  |
| H | -4.87288500 | -2.25022500 | -1.53718900 |
| H | -2.56681800 | -1.81498600 | -2.23492900 |
| H | -2.58323600 | -1.46239300 | -0.51208300 |
| O | -1.15440000 | 0.54430700  | -1.35952000 |
| H | -1.11429400 | 0.52713800  | -0.38678700 |

Coordinate I (trans)

|    |            |             |            |
|----|------------|-------------|------------|
| Fe | 1.46514200 | -0.00013600 | 0.11637700 |
| N  | 1.77738300 | -2.05255500 | 0.25108300 |

|   |             |             |             |
|---|-------------|-------------|-------------|
| C | 1.37905100  | -2.86048900 | 1.27975100  |
| C | 1.66431600  | -4.24058200 | 0.94749600  |
| C | 2.23141400  | -4.23944900 | -0.29419400 |
| C | 2.29525000  | -2.85862600 | -0.72464600 |
| C | 2.81273500  | -2.40347100 | -1.94759600 |
| C | 2.91205000  | -1.07911800 | -2.39975700 |
| C | 3.48670200  | -0.65021000 | -3.65874900 |
| C | 3.39620700  | 0.71100700  | -3.69051300 |
| C | 2.76579200  | 1.11884900  | -2.45128800 |
| N | 2.48875600  | 0.01337800  | -1.69684400 |
| C | 2.48485100  | 2.43902700  | -2.06961800 |
| C | 1.89736000  | 2.88942900  | -0.87687700 |
| C | 1.64813200  | 4.27258000  | -0.52837800 |
| C | 1.07145200  | 4.27079100  | 0.70904500  |
| C | 0.96561600  | 2.88646000  | 1.11976900  |
| N | 1.47422700  | 2.08052100  | 0.14046700  |
| C | 0.43321900  | 2.42861400  | 2.33522500  |
| C | 0.32652700  | 1.10265100  | 2.78226500  |
| C | -0.20065000 | 0.67949400  | 4.06393900  |
| C | -0.10102000 | -0.68099600 | 4.10116800  |
| C | 0.48770600  | -1.09199100 | 2.84268300  |
| C | 0.78378100  | -2.41149500 | 2.46876300  |
| H | 0.52726900  | -3.18056600 | 3.19178300  |
| N | 0.73007800  | 0.00888900  | 2.07117500  |
| H | -0.39020200 | -1.35191300 | 4.89956000  |
| H | -0.58686500 | 1.34358000  | 4.82617500  |
| H | 0.06910000  | 3.19371800  | 3.01501700  |
| H | 0.74748600  | 5.11906900  | 1.29782500  |
| H | 1.88936900  | 5.12278100  | -1.15299300 |
| H | 2.76426900  | 3.20994500  | -2.78213000 |
| H | 3.72426300  | 1.38543800  | -4.47073500 |

|   |             |             |             |
|---|-------------|-------------|-------------|
| H | 3.90368300  | -1.31088200 | -4.40761000 |
| H | 3.19129000  | -3.16851400 | -2.61953200 |
| H | 2.57868800  | -5.08583800 | -0.87231400 |
| H | 1.45527500  | -5.08827500 | 1.58693400  |
| S | 3.72993900  | 0.25462800  | 1.15093600  |
| H | 4.27962100  | -0.88620900 | 0.68069600  |
| O | -0.01909100 | -0.13359400 | -0.58165700 |
| C | -3.91981300 | 1.22412300  | -1.74531700 |
| C | -4.56694800 | -0.13384100 | -2.06763900 |
| C | -3.76268900 | -1.26275700 | -1.36213600 |
| C | -4.62174900 | -0.94880300 | -0.09771200 |
| C | -5.75096300 | -0.44562500 | -1.08498900 |
| C | -4.02500100 | 0.23110100  | 0.62928500  |
| C | -3.36244200 | 1.25191900  | -0.29156300 |
| H | -3.42975800 | 2.25775300  | 0.13849400  |
| C | -4.06148400 | 0.36309900  | 1.96058300  |
| H | -3.65170000 | 1.23777300  | 2.46210700  |
| H | -4.50099100 | -0.40275900 | 2.59629700  |
| H | -4.88250900 | -1.76630200 | 0.58423500  |
| H | -4.77503200 | -0.23468600 | -3.14003300 |
| H | -4.65043100 | 2.02731800  | -1.89852400 |
| H | -3.09928800 | 1.41461400  | -2.44839400 |
| H | -2.29279100 | 1.00859900  | -0.33167100 |
| H | -3.96975200 | -2.25459900 | -1.76882500 |
| H | -2.67819200 | -1.13665600 | -1.27798800 |
| C | -6.66548200 | 0.69402400  | -0.62799100 |
| H | -7.26742000 | 1.06386700  | -1.46840000 |
| H | -7.36150700 | 0.33703100  | 0.14225400  |
| H | -6.12128700 | 1.54233700  | -0.20519400 |
| C | -6.63211500 | -1.60123200 | -1.58523400 |
| H | -7.29669000 | -1.95189600 | -0.78534300 |

|   |             |             |             |
|---|-------------|-------------|-------------|
| H | -7.26404400 | -1.26340800 | -2.41685600 |
| H | -6.05580000 | -2.46162100 | -1.93816900 |

Coordinate II (trans) – TS (-1860.77)

|    |             |             |             |
|----|-------------|-------------|-------------|
| Fe | -1.27238900 | -0.02234300 | 0.18745200  |
| N  | -1.48352100 | 2.06439800  | -0.04448600 |
| C  | -1.03455100 | 3.02295700  | 0.81572300  |
| C  | -1.32295600 | 4.33619700  | 0.26958200  |
| C  | -1.94753000 | 4.13478800  | -0.92768700 |
| C  | -2.04198900 | 2.69827100  | -1.11257000 |
| C  | -2.62492400 | 2.03366600  | -2.20494100 |
| C  | -2.76065200 | 0.65008900  | -2.40951200 |
| C  | -3.39657900 | 0.03116600  | -3.55556700 |
| C  | -3.32340700 | -1.31834800 | -3.36894200 |
| C  | -2.64188800 | -1.53257900 | -2.10788900 |
| N  | -2.31752900 | -0.32328900 | -1.55563400 |
| C  | -2.36158900 | -2.78624100 | -1.53821300 |
| C  | -1.72362200 | -3.06210000 | -0.31722800 |
| C  | -1.46610000 | -4.37543300 | 0.24440600  |
| C  | -0.83188000 | -4.17521000 | 1.43666500  |
| C  | -0.70161600 | -2.73955100 | 1.60446900  |
| N  | -1.25248300 | -2.10475400 | 0.52950500  |
| C  | -0.11183400 | -2.07610200 | 2.69097100  |
| C  | 0.02197900  | -0.68985500 | 2.89677100  |
| C  | 0.61585600  | -0.07228800 | 4.06374700  |
| C  | 0.53089100  | 1.27909500  | 3.88267600  |
| C  | -0.11387000 | 1.49080100  | 2.60369500  |
| C  | -0.40257900 | 2.74686300  | 2.03775300  |
| H  | -0.10169300 | 3.60899000  | 2.62669900  |
| N  | -0.40119700 | 0.28179100  | 2.03282500  |
| H  | 0.86502300  | 2.06547600  | 4.54698600  |

|   |             |             |             |
|---|-------------|-------------|-------------|
| H | 1.03234900  | -0.60933000 | 4.90604800  |
| H | 0.28501500  | -2.70940800 | 3.47972400  |
| H | -0.48267400 | -4.91939600 | 2.14083900  |
| H | -1.73808400 | -5.31549700 | -0.21815000 |
| H | -2.68649200 | -3.64873900 | -2.11365900 |
| H | -3.69410700 | -2.10445700 | -4.01391500 |
| H | -3.83858300 | 0.56915000  | -4.38418500 |
| H | -3.03255300 | 2.66774000  | -2.98755800 |
| H | -2.31397500 | 4.87853600  | -1.62351000 |
| H | -1.07749300 | 5.27699200  | 0.74526900  |
| S | -3.39147400 | 0.02766300  | 1.41338500  |
| H | -4.22359900 | -0.29757400 | 0.39937200  |
| O | 0.22745200  | -0.06570700 | -0.71561300 |
| C | 3.15106800  | -1.03980600 | 0.40910100  |
| C | 4.02084400  | -1.37960600 | -0.81345400 |
| C | 3.32307100  | -0.83142700 | -2.09020600 |
| C | 4.00554900  | 0.53104000  | -1.75741700 |
| C | 5.14084100  | -0.30114400 | -1.03498600 |
| C | 3.17762100  | 1.25380900  | -0.71972600 |
| C | 2.54297400  | 0.36688200  | 0.28081600  |
| H | 2.32146800  | 0.85535600  | 1.23264700  |
| C | 3.02332700  | 2.59511200  | -0.71229900 |
| H | 2.43657000  | 3.09690700  | 0.05388400  |
| H | 3.48029700  | 3.22345800  | -1.47272200 |
| H | 4.30734400  | 1.19035300  | -2.57862100 |
| H | 4.33667300  | -2.42968200 | -0.79935700 |
| H | 3.74559300  | -1.10876700 | 1.33070900  |
| H | 2.35044400  | -1.78424700 | 0.50970500  |
| H | 1.34005000  | 0.17710700  | -0.16898500 |
| C | 5.84052200  | 0.31227600  | 0.18098500  |
| H | 6.46468300  | -0.43905300 | 0.68201600  |

|   |            |             |             |
|---|------------|-------------|-------------|
| H | 6.50072200 | 1.13122300  | -0.13274900 |
| H | 5.14635900 | 0.71871600  | 0.92112100  |
| C | 6.21795300 | -0.77717700 | -2.02235800 |
| H | 6.86966200 | -1.51896500 | -1.54302000 |
| H | 5.80399400 | -1.23642100 | -2.92481200 |
| H | 6.84861400 | 0.06406300  | -2.33672600 |
| H | 3.70482200 | -1.27380800 | -3.01229600 |
| H | 2.22918400 | -0.84863000 | -2.10940000 |

Coordinate III (trans)

|    |             |             |             |
|----|-------------|-------------|-------------|
| Fe | -1.12068200 | -0.07210800 | -0.00282900 |
| N  | -2.60871100 | 0.89292600  | -1.15943700 |
| C  | -2.71755800 | 2.25831600  | -1.33356700 |
| C  | -3.55703500 | 2.53596900  | -2.47373700 |
| C  | -3.93494700 | 1.33266700  | -2.99635800 |
| C  | -3.33246300 | 0.30738500  | -2.17920600 |
| C  | -3.45558300 | -1.06480200 | -2.38633700 |
| C  | -2.90093200 | -2.07446600 | -1.59566500 |
| C  | -3.10555800 | -3.48980100 | -1.79265600 |
| C  | -2.42731600 | -4.13231300 | -0.79678300 |
| C  | -1.80083900 | -3.11346100 | 0.01128400  |
| N  | -2.10111900 | -1.86910600 | -0.49573400 |
| C  | -1.02677300 | -3.35321100 | 1.14690500  |
| C  | -0.43850700 | -2.38962100 | 1.96810600  |
| C  | 0.31423600  | -2.67015500 | 3.16819800  |
| C  | 0.70097100  | -1.46731100 | 3.68527900  |
| C  | 0.18683400  | -0.44604700 | 2.80304400  |
| N  | -0.50184100 | -1.03049900 | 1.76689900  |
| C  | 0.35115800  | 0.92891800  | 2.98342700  |
| C  | -0.17426100 | 1.93639900  | 2.17452900  |
| C  | -0.03564100 | 3.35275900  | 2.41598400  |



|   |             |             |             |
|---|-------------|-------------|-------------|
| C | -0.72102300 | 3.99511200  | 1.42455600  |
| C | -1.28561100 | 2.97541100  | 0.57339500  |
| C | -2.09688000 | 3.21815500  | -0.53730800 |
| H | -2.27846400 | 4.25795400  | -0.79167600 |
| N | -0.93157300 | 1.73110200  | 1.04222200  |
| H | -0.85156600 | 5.06025700  | 1.28241000  |
| H | 0.50643600  | 3.78810500  | 3.24576400  |
| H | 0.92224900  | 1.24498900  | 3.85098800  |
| H | 1.27335600  | -1.27709000 | 4.58421100  |
| H | 0.50647700  | -3.66086100 | 3.55976000  |
| H | -0.88453200 | -4.39125700 | 1.43167700  |
| H | -2.35742000 | -5.19678300 | -0.61273700 |
| H | -3.70198700 | -3.92387400 | -2.58495400 |
| H | -4.06043500 | -1.38117700 | -3.23062600 |
| H | -4.56548900 | 1.14568900  | -3.85623700 |
| H | -3.81610200 | 3.52745100  | -2.82259400 |
| S | -4.70710700 | 0.44140400  | 1.10885800  |
| H | -4.18234300 | -0.79537700 | 0.95882100  |
| O | 0.32968500  | -0.13705800 | -1.12514700 |
| C | 4.60535100  | -0.76271100 | 0.91506300  |
| C | 5.13424600  | -1.24391400 | -0.44883000 |
| C | 3.94970700  | -1.26348100 | -1.45502100 |
| C | 4.23372200  | 0.25558500  | -1.66244100 |
| C | 5.73501600  | -0.05054300 | -1.28006700 |
| C | 3.53866100  | 1.00527300  | -0.53610300 |
| C | 3.72988900  | 0.45002600  | 0.74313000  |
| H | 3.25895900  | 0.89992000  | 1.61431400  |
| C | 2.76887100  | 2.12850300  | -0.77360300 |
| H | 2.28185200  | 2.66078500  | 0.03979200  |
| H | 2.66240200  | 2.53919500  | -1.77348400 |
| H | 4.03719200  | 0.70461000  | -2.64174800 |

|   |            |             |             |
|---|------------|-------------|-------------|
| H | 5.74898700 | -2.14560700 | -0.34595300 |
| H | 5.43709500 | -0.53832600 | 1.60190400  |
| H | 4.03773900 | -1.57283100 | 1.40087200  |
| H | 1.05450300 | 0.49319600  | -0.94646400 |
| H | 4.15153400 | -1.86108200 | -2.34593300 |
| H | 2.96051500 | -1.52490900 | -1.06497400 |
| C | 6.55631900 | 1.02419300  | -0.56203200 |
| H | 7.51114300 | 0.60681100  | -0.21697600 |
| H | 6.78845700 | 1.84811400  | -1.24928700 |
| H | 6.04353700 | 1.45086800  | 0.30373200  |
| C | 6.54480500 | -0.54049700 | -2.49175200 |
| H | 6.75901500 | 0.29441000  | -3.17090800 |
| H | 7.50635800 | -0.95424300 | -2.16199100 |
| H | 6.03403600 | -1.31510400 | -3.07094500 |

Coordinate V (trans)

|    |             |             |             |
|----|-------------|-------------|-------------|
| Fe | -1.94003500 | 0.06607200  | 0.29143800  |
| N  | -2.30161400 | -0.37599000 | -1.71699300 |
| C  | -2.58026700 | 0.54076600  | -2.70623500 |
| C  | -3.06442200 | -0.14261400 | -3.88209800 |
| C  | -3.07719700 | -1.47596500 | -3.59107300 |
| C  | -2.60151700 | -1.61592600 | -2.23522300 |
| C  | -2.46063400 | -2.82455700 | -1.55471500 |
| C  | -1.97643200 | -2.98789600 | -0.25681600 |
| C  | -1.78677800 | -4.25591000 | 0.40343300  |
| C  | -1.26216400 | -3.98992600 | 1.63605400  |
| C  | -1.12610000 | -2.55783000 | 1.73614400  |
| N  | -1.57731100 | -1.96524600 | 0.57626500  |
| C  | -0.58907300 | -1.87919600 | 2.83024600  |
| C  | -0.38725200 | -0.50335000 | 2.93036600  |
| C  | 0.17062100  | 0.17360000  | 4.07499400  |

|   |             |             |             |
|---|-------------|-------------|-------------|
| C | 0.18852900  | 1.50707000  | 3.78146300  |
| C | -0.35768400 | 1.65498600  | 2.45475200  |
| N | -0.69248700 | 0.41656200  | 1.94752900  |
| C | -0.52470200 | 2.86663500  | 1.78484800  |
| C | -1.05159500 | 3.03443400  | 0.50414200  |
| C | -1.15888000 | 4.29355500  | -0.19048900 |
| C | -1.69020700 | 4.02737400  | -1.42024000 |
| C | -1.91218100 | 2.60400500  | -1.48501100 |
| C | -2.41063600 | 1.92028800  | -2.59372300 |
| H | -2.67137200 | 2.51860600  | -3.46126300 |
| N | -1.52493000 | 2.01847900  | -0.29836000 |
| H | -1.90554200 | 4.72317700  | -2.22100100 |
| H | -0.85385900 | 5.25014600  | 0.21398700  |
| H | -0.20228200 | 3.76350100  | 2.30470700  |
| H | 0.53932200  | 2.32393200  | 4.39904900  |
| H | 0.50420400  | -0.31723100 | 4.98029300  |
| H | -0.28442400 | -2.48236300 | 3.67990000  |
| H | -0.97838500 | -4.69289700 | 2.40870800  |
| H | -2.01760300 | -5.21956600 | -0.03220000 |
| H | -2.73506600 | -3.72647900 | -2.09305500 |
| H | -3.37403900 | -2.29827800 | -4.22940100 |
| H | -3.34827100 | 0.34430600  | -4.80630300 |
| S | -4.13489800 | 0.37093400  | 1.19245000  |
| H | -4.41608700 | -0.94810100 | 1.28103000  |
| C | 3.31963200  | -0.17265400 | -1.98607200 |
| C | 4.55865400  | -1.02454700 | -1.65998600 |
| C | 5.64707200  | -0.18008800 | -0.90665000 |
| C | 4.79054300  | -0.49022500 | 0.38823200  |
| C | 4.31639100  | -1.79148400 | -0.32951000 |
| H | 3.29773900  | -2.12775800 | -0.12462800 |
| H | 5.00894400  | -2.62229200 | -0.18191300 |

|   |            |             |             |
|---|------------|-------------|-------------|
| C | 3.64280100 | 0.48308300  | 0.46735300  |
| C | 2.66958300 | 0.42859700  | -0.71432200 |
| C | 3.46266400 | 1.34564900  | 1.47393100  |
| H | 2.64812500 | 2.06737400  | 1.47153000  |
| H | 4.12235100 | 1.35998600  | 2.33893800  |
| H | 5.33030700 | -0.56961700 | 1.33874400  |
| C | 7.01181600 | -0.88586900 | -0.87368800 |
| H | 7.67891800 | -0.39772700 | -0.15196900 |
| H | 7.49109000 | -0.82851200 | -1.85948100 |
| H | 6.94491500 | -1.94308900 | -0.60090600 |
| C | 5.87237800 | 1.28134400  | -1.30392800 |
| H | 6.31678900 | 1.34180400  | -2.30584400 |
| H | 6.56964200 | 1.76156900  | -0.60532200 |
| H | 4.95652200 | 1.87830300  | -1.30728500 |
| H | 4.89084600 | -1.59130800 | -2.53811300 |
| H | 2.55854900 | -0.78665700 | -2.48111200 |
| H | 3.58465200 | 0.62761100  | -2.68625000 |
| O | 1.54750000 | -0.42112800 | -0.38923000 |
| H | 2.29401100 | 1.44008800  | -0.92273000 |
| H | 1.14588800 | -0.08905000 | 0.43297900  |

**Table S14: Coordinates Beta-Pinene**

Alpha site – Doublet state

Coordinate 1

|    |             |             |             |
|----|-------------|-------------|-------------|
| Fe | 1.45571400  | 0.01158500  | 0.17518400  |
| N  | 1.90242500  | 1.91962000  | -0.30792600 |
| C  | 2.75612700  | 2.34091300  | -1.29634500 |
| C  | 2.73440400  | 3.77923900  | -1.40491400 |
| C  | 1.84654300  | 4.22696200  | -0.47475400 |
| C  | 1.33157600  | 3.06016600  | 0.19916600  |
| C  | 0.39212600  | 3.09372700  | 1.22481200  |
| C  | -0.10145900 | 1.98604700  | 1.90657100  |
| C  | -1.05138700 | 2.04949900  | 2.99103400  |
| C  | -1.26799700 | 0.76671200  | 3.39406800  |
| C  | -0.45087000 | -0.07377100 | 2.55229200  |
| N  | 0.25742000  | 0.68600800  | 1.65587200  |
| C  | -0.39276700 | -1.46019200 | 2.64503400  |
| C  | 0.39010400  | -2.29568400 | 1.85447500  |
| C  | 0.43390100  | -3.73172000 | 1.98321900  |
| C  | 1.30211500  | -4.18133900 | 1.03535700  |
| C  | 1.78432000  | -3.01725400 | 0.33307700  |
| N  | 1.22224700  | -1.87680500 | 0.84759900  |
| C  | 2.69794000  | -3.05294800 | -0.71595300 |
| C  | 3.19388500  | -1.94457700 | -1.39512400 |
| C  | 4.16326200  | -2.00693700 | -2.46231000 |
| C  | 4.39922100  | -0.72281900 | -2.84831600 |
| C  | 3.57231900  | 0.11633900  | -2.01490600 |
| C  | 3.53049800  | 1.50462200  | -2.09387400 |
| H  | 4.15975600  | 1.97716900  | -2.84144500 |

|   |             |             |             |
|---|-------------|-------------|-------------|
| N | 2.84644700  | -0.64428000 | -1.13493100 |
| H | 5.06684200  | -0.35847500 | -3.61797600 |
| H | 4.59661200  | -2.92062300 | -2.84722000 |
| H | 3.06155700  | -4.02800000 | -1.02448400 |
| H | 1.60164000  | -5.19836600 | 0.81916600  |
| H | -0.13041000 | -4.30171900 | 2.70947300  |
| H | -1.01010900 | -1.93191400 | 3.40296600  |
| H | -1.91094500 | 0.40498600  | 4.18563500  |
| H | -1.47870800 | 2.96343400  | 3.38195600  |
| H | 0.02170200  | 4.06834000  | 1.52647100  |
| H | 1.55649200  | 5.24489700  | -0.25011000 |
| H | 3.32688400  | 4.35193900  | -2.10617300 |
| O | 0.23481000  | -0.09143900 | -0.91030400 |
| S | 3.35180400  | 0.16476500  | 1.87892800  |
| H | 3.20019800  | 1.46428500  | 2.21678600  |
| C | -6.33194400 | -0.74861600 | -0.80700900 |
| C | -5.55464300 | 0.30665800  | -0.00092100 |
| C | -4.37526800 | -0.38387500 | 0.74022300  |
| C | -3.57367500 | -0.22365800 | -0.58920200 |
| C | -4.48745900 | 1.03143000  | -0.89566800 |
| C | -4.82553500 | 1.35056800  | -2.35440800 |
| H | -5.60334300 | 2.12360100  | -2.40853400 |
| H | -3.93956300 | 1.73942200  | -2.87314800 |
| H | -5.17537100 | 0.48186900  | -2.91788400 |
| C | -3.94527800 | 2.30904800  | -0.23531700 |
| H | -4.69882000 | 3.10648100  | -0.27450400 |
| H | -3.66657500 | 2.16891400  | 0.81331800  |
| H | -3.05546900 | 2.66774600  | -0.76861700 |
| C | -3.93247500 | -1.34957400 | -1.52723800 |
| C | -5.37608300 | -1.82809200 | -1.39574900 |
| H | -5.74681300 | -2.20262800 | -2.35628400 |

|   |             |             |             |
|---|-------------|-------------|-------------|
| H | -5.37698300 | -2.69307000 | -0.71900200 |
| C | -3.05989900 | -1.88618400 | -2.38795500 |
| H | -3.34609200 | -2.67866800 | -3.07700000 |
| H | -2.02513000 | -1.55223600 | -2.42617200 |
| H | -2.49214500 | -0.05595600 | -0.54253100 |
| H | -4.53673100 | -1.40056700 | 1.11447500  |
| H | -3.96131500 | 0.22096900  | 1.54924000  |
| H | -6.23205000 | 0.94617800  | 0.57853900  |
| H | -6.90112000 | -0.25800700 | -1.60544800 |
| H | -7.06926200 | -1.23588700 | -0.15719100 |

Coordinate II – TS (-1655.11)

|    |             |             |             |
|----|-------------|-------------|-------------|
| Fe | -1.08984500 | 0.02570200  | 0.34743800  |
| N  | -0.64993500 | -1.81826200 | 1.01892300  |
| C  | -1.12433600 | -3.00239600 | 0.50720900  |
| C  | -0.56675600 | -4.11945600 | 1.23267200  |
| C  | 0.24515300  | -3.59772800 | 2.19419000  |
| C  | 0.18664800  | -2.16290400 | 2.04879000  |
| C  | 0.88279700  | -1.25425600 | 2.84193400  |
| C  | 0.84574400  | 0.12852100  | 2.69931700  |
| C  | 1.56915400  | 1.05817000  | 3.53349000  |
| C  | 1.27267900  | 2.30549200  | 3.07540400  |
| C  | 0.36203000  | 2.13619100  | 1.96750600  |
| N  | 0.12051300  | 0.80101400  | 1.74405500  |
| C  | -0.20599400 | 3.18694500  | 1.25503700  |
| C  | -1.14585600 | 3.06916100  | 0.23369900  |
| C  | -1.74312000 | 4.18556800  | -0.46195900 |
| C  | -2.61620100 | 3.65828100  | -1.36471100 |
| C  | -2.54352600 | 2.22270300  | -1.21993600 |
| N  | -1.64640600 | 1.88653400  | -0.23909200 |
| C  | -3.27500400 | 1.31607100  | -1.98211600 |

|   |             |             |             |
|---|-------------|-------------|-------------|
| C | -3.19720100 | -0.07024000 | -1.88706300 |
| C | -3.93910500 | -0.99604900 | -2.71328300 |
| C | -3.57795700 | -2.24701700 | -2.31555300 |
| C | -2.62155600 | -2.07960000 | -1.24388900 |
| C | -2.02444500 | -3.12632700 | -0.54604100 |
| H | -2.29791800 | -4.13492100 | -0.84088900 |
| N | -2.40339200 | -0.75025100 | -1.00099500 |
| H | -3.91788200 | -3.20170800 | -2.69570900 |
| H | -4.63641000 | -0.70807600 | -3.48936400 |
| H | -3.95174600 | 1.72615200  | -2.72548000 |
| H | -3.25295000 | 4.17518500  | -2.07096800 |
| H | -1.51401700 | 5.22585600  | -0.27023100 |
| H | 0.09239500  | 4.19178600  | 1.53781600  |
| H | 1.61984600  | 3.26144000  | 3.44565400  |
| H | 2.21181500  | 0.77531100  | 4.35708100  |
| H | 1.50413300  | -1.65770400 | 3.63534900  |
| H | 0.83467500  | -4.11887400 | 2.93725200  |
| H | -0.78310000 | -5.15894800 | 1.02256300  |
| O | 0.07385700  | -0.03434300 | -0.96990600 |
| S | -2.96511200 | 0.03854100  | 1.91399000  |
| H | -2.26354200 | -0.14671900 | 3.05461800  |
| C | 5.31383900  | 0.21360500  | -1.03746000 |
| C | 4.39691900  | -0.97984400 | -0.71731900 |
| C | 3.38211000  | -0.56697300 | 0.39439500  |
| C | 2.57131200  | 0.00152500  | -0.78136600 |
| C | 3.18550300  | -1.08571800 | -1.73060200 |
| C | 3.39802100  | -0.73385900 | -3.20177900 |
| H | 4.02630400  | -1.49285100 | -3.68450900 |
| H | 2.43592200  | -0.71866300 | -3.72878800 |
| H | 3.86694200  | 0.24127800  | -3.35075100 |
| C | 2.49414200  | -2.45455700 | -1.64244800 |



|   |            |             |             |
|---|------------|-------------|-------------|
| H | 3.11889500 | -3.21725800 | -2.12335900 |
| H | 2.30517900 | -2.77885600 | -0.61558500 |
| H | 1.53229200 | -2.42723600 | -2.16620900 |
| C | 3.03525600 | 1.37368100  | -1.16347800 |
| C | 4.53727900 | 1.55542600  | -0.92141200 |
| H | 4.93846200 | 2.31219200  | -1.60366200 |
| H | 4.67371800 | 1.95332400  | 0.09228300  |
| C | 2.25314000 | 2.32166100  | -1.69179500 |
| H | 2.65966500 | 3.28311100  | -1.99757200 |
| H | 1.18650900 | 2.16490100  | -1.81661000 |
| H | 3.71307900 | 0.13164300  | 1.16613400  |
| H | 2.91289600 | -1.42845800 | 0.87078200  |
| H | 4.95527300 | -1.91125700 | -0.55972500 |
| H | 5.73997000 | 0.09532900  | -2.04000200 |
| H | 6.15762600 | 0.21991700  | -0.33769400 |
| H | 1.26939900 | -0.03576200 | -0.72924100 |

#### Coordinate III

|    |             |             |            |
|----|-------------|-------------|------------|
| Fe | -1.23600300 | 0.04435300  | 0.30908100 |
| N  | -0.65529200 | -1.74535500 | 1.05959000 |
| C  | -1.02106900 | -2.97850600 | 0.57509600 |
| C  | -0.37642300 | -4.02360000 | 1.33477700 |
| C  | 0.38255400  | -3.41115800 | 2.28454500 |
| C  | 0.21110600  | -1.98993200 | 2.09863100 |
| C  | 0.85003400  | -1.00587700 | 2.84303000 |
| C  | 0.72778000  | 0.36632300  | 2.63860300 |
| C  | 1.41074700  | 1.37565900  | 3.41200200 |
| C  | 1.02396600  | 2.57967200  | 2.90723500 |
| C  | 0.10189400  | 2.30101500  | 1.83190000 |
| N  | -0.05950000 | 0.94860200  | 1.67778200 |
| C  | -0.55258600 | 3.27711700  | 1.08635000 |

|   |             |             |             |
|---|-------------|-------------|-------------|
| C | -1.48791000 | 3.05286900  | 0.08146200  |
| C | -2.16319500 | 4.09920200  | -0.65223100 |
| C | -3.00161100 | 3.47996600  | -1.52713400 |
| C | -2.82945000 | 2.05937600  | -1.32603100 |
| N | -1.91028100 | 1.82323000  | -0.34420100 |
| C | -3.50115300 | 1.07428600  | -2.04714800 |
| C | -3.32259700 | -0.29487600 | -1.90127700 |
| C | -3.98948300 | -1.30456700 | -2.69341400 |
| C | -3.52025700 | -2.50592400 | -2.26365100 |
| C | -2.57602900 | -2.22707300 | -1.20300600 |
| C | -1.89163300 | -3.20145300 | -0.48437300 |
| H | -2.07638200 | -4.23620800 | -0.75830100 |
| N | -2.47308800 | -0.87854400 | -0.99947000 |
| H | -3.78053900 | -3.49667900 | -2.61395200 |
| H | -4.71337600 | -1.10128200 | -3.47224700 |
| H | -4.20902200 | 1.40701400  | -2.80073200 |
| H | -3.67573700 | 3.92554300  | -2.24751000 |
| H | -2.00595200 | 5.15986400  | -0.50292900 |
| H | -0.32179800 | 4.31208500  | 1.32187400  |
| H | 1.31898100  | 3.57113700  | 3.22660000  |
| H | 2.08914400  | 1.17345500  | 4.23118100  |
| H | 1.50638700  | -1.33350300 | 3.64410400  |
| H | 1.00712600  | -3.86422700 | 3.04407400  |
| H | -0.50361000 | -5.08358900 | 1.15502400  |
| O | 0.05148100  | 0.01060000  | -0.95656500 |
| S | -3.08625200 | -0.21895300 | 1.86404700  |
| H | -2.37212500 | -0.36833200 | 3.00296700  |
| C | 5.67120100  | 0.25558100  | -1.16935400 |
| C | 4.80096900  | -0.91748300 | -0.66956400 |
| C | 3.93597100  | -0.42746000 | 0.53754900  |
| C | 3.02912700  | 0.07893500  | -0.57953800 |

|   |            |             |             |
|---|------------|-------------|-------------|
| C | 3.46285000 | -1.07375400 | -1.51652600 |
| C | 3.48060300 | -0.81793000 | -3.02159200 |
| H | 4.00077900 | -1.63239200 | -3.54166300 |
| H | 2.45245700 | -0.78038700 | -3.40005800 |
| H | 3.95911800 | 0.12520100  | -3.29436600 |
| C | 2.76177100 | -2.41589400 | -1.24830000 |
| H | 3.27790400 | -3.22323300 | -1.78306100 |
| H | 2.72824000 | -2.68534500 | -0.18915100 |
| H | 1.72871100 | -2.36823100 | -1.60879200 |
| C | 3.39870000 | 1.41881800  | -1.09053700 |
| C | 4.92072100 | 1.61478600  | -1.02829100 |
| H | 5.24436000 | 2.33139300  | -1.79108100 |
| H | 5.17873600 | 2.06100400  | -0.05894700 |
| C | 2.54013800 | 2.30479600  | -1.60703000 |
| H | 2.88514200 | 3.24986400  | -2.02160900 |
| H | 1.47291600 | 2.10376700  | -1.62028600 |
| H | 4.36709600 | 0.30899900  | 1.22021600  |
| H | 3.51216800 | -1.25144300 | 1.11450200  |
| H | 5.37895400 | -1.84245500 | -0.53127200 |
| H | 5.96283400 | 0.08073200  | -2.21119900 |
| H | 6.60081800 | 0.28880900  | -0.58828200 |
| H | 0.91765500 | -0.05932900 | -0.50244700 |

#### Coordinate V

|    |             |             |             |
|----|-------------|-------------|-------------|
| Fe | -1.12882000 | 0.03680500  | 0.37771900  |
| N  | -1.94098600 | -0.25740500 | -1.44811800 |
| C  | -2.36510200 | 0.69135300  | -2.35340800 |
| C  | -2.97964600 | 0.05679000  | -3.49261400 |
| C  | -2.93908900 | -1.28594300 | -3.26374600 |
| C  | -2.29822200 | -1.47391800 | -1.98493300 |
| C  | -2.08506200 | -2.71263300 | -1.39400800 |

|   |             |             |             |
|---|-------------|-------------|-------------|
| C | -1.47958100 | -2.92414700 | -0.16158000 |
| C | -1.25680100 | -4.22907500 | 0.41561600  |
| C | -0.63512500 | -4.03057800 | 1.61111000  |
| C | -0.47882400 | -2.60434000 | 1.76528900  |
| N | -0.99617700 | -1.94566800 | 0.67437500  |
| C | 0.10817900  | -1.99151000 | 2.86484800  |
| C | 0.25640300  | -0.61913200 | 3.01496600  |
| C | 0.85441000  | 0.01545400  | 4.16360100  |
| C | 0.79879200  | 1.35858400  | 3.94306900  |
| C | 0.16480700  | 1.54575800  | 2.65980800  |
| N | -0.14842000 | 0.32805000  | 2.10158100  |
| C | -0.08834200 | 2.78755400  | 2.09153900  |
| C | -0.70044900 | 2.99981500  | 0.86306300  |
| C | -0.94636300 | 4.30466900  | 0.29646200  |
| C | -1.54807300 | 4.10380700  | -0.90873000 |
| C | -1.67075000 | 2.67626800  | -1.07845200 |
| C | -2.23770900 | 2.06452500  | -2.18913800 |
| H | -2.61403500 | 2.70448300  | -2.98076000 |
| N | -1.14573400 | 2.01793900  | 0.01043000  |
| H | -1.88132700 | 4.83951400  | -1.62955300 |
| H | -0.68209400 | 5.24070600  | 0.77195200  |
| H | 0.21702800  | 3.66402600  | 2.65444800  |
| H | 1.14774200  | 2.16262300  | 4.57851200  |
| H | 1.25881200  | -0.51345700 | 5.01720300  |
| H | 0.47243200  | -2.62915800 | 3.66400800  |
| H | -0.30428100 | -4.76718400 | 2.33211800  |
| H | -1.54159400 | -5.16366800 | -0.05077900 |
| H | -2.41781300 | -3.58875100 | -1.94179100 |
| H | -3.30468600 | -2.08876600 | -3.89135800 |
| H | -3.38517200 | 0.58494300  | -4.34614000 |
| O | 0.82827700  | -0.11641700 | -0.84216000 |

|   |             |             |             |
|---|-------------|-------------|-------------|
| S | -3.16823700 | 0.14288900  | 1.37484000  |
| H | -2.90794600 | -0.65101200 | 2.43710900  |
| C | 5.05459500  | 0.17618600  | -0.48952800 |
| C | 4.08836200  | -1.00700900 | -0.33154700 |
| C | 2.87535800  | -0.58792500 | 0.55042900  |
| C | 2.25175600  | -0.03454600 | -0.75008600 |
| C | 3.09996100  | -1.11318600 | -1.54751300 |
| C | 3.59222500  | -0.76100900 | -2.95426100 |
| H | 4.31922400  | -1.50690800 | -3.29935700 |
| H | 2.75500900  | -0.76826300 | -3.66413100 |
| H | 4.06380600  | 0.22246500  | -3.01721900 |
| C | 2.41076400  | -2.48504600 | -1.60304200 |
| H | 3.11658000  | -3.23023300 | -1.99022900 |
| H | 2.05996400  | -2.83533800 | -0.62901100 |
| H | 1.54764300  | -2.46102100 | -2.27823900 |
| C | 2.82199400  | 1.34382400  | -1.03962100 |
| C | 4.26941500  | 1.51325500  | -0.58216200 |
| H | 4.78580800  | 2.23472900  | -1.22409400 |
| H | 4.24188800  | 1.96695600  | 0.41730400  |
| C | 2.13863100  | 2.32562900  | -1.63493000 |
| H | 2.60948300  | 3.28067300  | -1.85607000 |
| H | 1.09104600  | 2.23375500  | -1.90369300 |
| H | 0.53699800  | 0.14715600  | -1.73133400 |
| H | 3.04754200  | 0.11761600  | 1.36816700  |
| H | 2.31450200  | -1.44155200 | 0.92983100  |
| H | 4.61181400  | -1.92967900 | -0.05880000 |
| H | 5.67960500  | 0.02784900  | -1.37763200 |
| H | 5.73703000  | 0.21441700  | 0.36779800  |

Alpha site – Quartet state

Coordinate I

|    |             |             |             |
|----|-------------|-------------|-------------|
| Fe | 1.46165200  | 0.01802400  | 0.19463400  |
| N  | 1.85111000  | 2.01056800  | -0.23522400 |
| C  | 2.67895600  | 2.46206700  | -1.21949500 |
| C  | 2.59124900  | 3.92593900  | -1.28640800 |
| C  | 1.70214600  | 4.31031900  | -0.34060100 |
| C  | 1.23086900  | 3.08849200  | 0.32255700  |
| C  | 0.29686600  | 3.04296400  | 1.36629700  |
| C  | -0.17096500 | 1.89419700  | 2.01848400  |
| C  | -1.14367900 | 1.87914900  | 3.11852900  |
| C  | -1.31905500 | 0.58299300  | 3.46941400  |
| C  | -0.45733400 | -0.21686100 | 2.58932000  |
| N  | 0.21079200  | 0.61612400  | 1.74280100  |
| C  | -0.34423600 | -1.61298100 | 2.62167000  |
| C  | 0.46105800  | -2.41011100 | 1.79727300  |
| C  | 0.54414300  | -3.87435600 | 1.86056700  |
| C  | 1.41892100  | -4.26028700 | 0.90213900  |
| C  | 1.88668100  | -3.03866000 | 0.23595000  |
| N  | 1.28660400  | -1.95883900 | 0.81084200  |
| C  | 2.80864200  | -2.99442800 | -0.81844200 |
| C  | 3.27624600  | -1.84542700 | -1.46971700 |
| C  | 4.25449700  | -1.82994000 | -2.56482300 |
| C  | 4.44366400  | -0.53305800 | -2.90327600 |
| C  | 3.58388800  | 0.26685300  | -2.02127500 |
| C  | 3.48360800  | 1.66427500  | -2.04364300 |
| H  | 4.09025100  | 2.18320800  | -2.77857000 |
| N  | 2.90730600  | -0.56622300 | -1.18212200 |
| H  | 5.09247600  | -0.12459900 | -3.66699100 |
| H  | 4.71541900  | -2.71117300 | -2.99149100 |
| H  | 3.20183700  | -3.94509900 | -1.16322300 |
| H  | 1.73768000  | -5.26230500 | 0.64641700  |

|   |             |             |             |
|---|-------------|-------------|-------------|
| H | -0.00673400 | -4.49291900 | 2.55689300  |
| H | -0.94586800 | -2.13212400 | 3.36055300  |
| H | -1.95706600 | 0.17592400  | 4.24287600  |
| H | -1.60707500 | 2.75992400  | 3.54340100  |
| H | -0.10393900 | 3.99301100  | 1.70388800  |
| H | 1.37584500  | 5.31157200  | -0.09148400 |
| H | 3.14794900  | 4.54518100  | -1.97747600 |
| O | 0.22993000  | -0.08721600 | -0.90079300 |
| S | 3.33506500  | 0.14847000  | 1.84911000  |
| H | 3.13268400  | 1.41633200  | 2.27087000  |
| C | -6.34563800 | -0.71580200 | -0.91454500 |
| C | -5.58015200 | 0.31576700  | -0.06741200 |
| C | -4.44838700 | -0.40639400 | 0.71676700  |
| C | -3.58828000 | -0.25394300 | -0.57651400 |
| C | -4.46066100 | 1.02339000  | -0.91037800 |
| C | -4.72973800 | 1.36107600  | -2.37925100 |
| H | -5.48926700 | 2.14985100  | -2.45948000 |
| H | -3.81497300 | 1.73648400  | -2.85626400 |
| H | -5.07199900 | 0.50405900  | -2.96485200 |
| C | -3.91927100 | 2.28369500  | -0.21687400 |
| H | -4.65077700 | 3.09941300  | -0.28570900 |
| H | -3.69413800 | 2.13080900  | 0.84280500  |
| H | -2.99687300 | 2.62374800  | -0.70507700 |
| C | -3.93170500 | -1.36450300 | -1.53826000 |
| C | -5.38965100 | -1.81195000 | -1.47137900 |
| H | -5.72766100 | -2.17127000 | -2.44964000 |
| H | -5.43803900 | -2.68154000 | -0.80229300 |
| C | -3.03519500 | -1.91389400 | -2.36563900 |
| H | -3.30906800 | -2.69484300 | -3.07265600 |
| H | -1.99284600 | -1.60216500 | -2.35709900 |
| H | -2.50636200 | -0.11023800 | -0.48405500 |

|   |             |             |             |
|---|-------------|-------------|-------------|
| H | -4.64754300 | -1.42197400 | 1.07549800  |
| H | -4.05599500 | 0.18320300  | 1.54758000  |
| H | -6.26725800 | 0.96574300  | 0.48850900  |
| H | -6.86902300 | -0.20633200 | -1.73226900 |
| H | -7.12068500 | -1.19120000 | -0.30085400 |

Coordinate II – TS (-1756.48)

|    |             |             |             |
|----|-------------|-------------|-------------|
| Fe | -1.12266300 | 0.02568200  | 0.30660800  |
| N  | -2.19933700 | -1.36748900 | -0.67905200 |
| C  | -3.14005900 | -1.16871000 | -1.65483100 |
| C  | -3.64632500 | -2.43281200 | -2.13812800 |
| C  | -2.99194800 | -3.40360400 | -1.44335100 |
| C  | -2.09446700 | -2.72741800 | -0.53428900 |
| C  | -1.26015700 | -3.37256800 | 0.37415500  |
| C  | -0.42272600 | -2.75894400 | 1.30549100  |
| C  | 0.36831300  | -3.46988400 | 2.28243000  |
| C  | 1.00476200  | -2.52485000 | 3.03023900  |
| C  | 0.60778700  | -1.24348400 | 2.49730000  |
| N  | -0.26149800 | -1.40602200 | 1.44939100  |
| C  | 1.05917300  | -0.01298900 | 2.97021500  |
| C  | 0.70996900  | 1.23163000  | 2.45251000  |
| C  | 1.20180300  | 2.49574200  | 2.94689000  |
| C  | 0.62423400  | 3.46247100  | 2.18050300  |
| C  | -0.22256600 | 2.78264700  | 1.22801200  |
| N  | -0.15413400 | 1.42672800  | 1.40488400  |
| C  | -1.02379200 | 3.42858700  | 0.28613400  |
| C  | -1.90369300 | 2.81918600  | -0.60361100 |
| C  | -2.75516900 | 3.53227500  | -1.52832300 |
| C  | -3.47461700 | 2.59145200  | -2.19980700 |
| C  | -3.05469100 | 1.30807300  | -1.68584600 |
| C  | -3.54325900 | 0.07916500  | -2.12460500 |



|   |             |             |             |
|---|-------------|-------------|-------------|
| H | -4.29796300 | 0.09535300  | -2.90489600 |
| N | -2.10150900 | 1.46620700  | -0.71532600 |
| H | -4.21950700 | 2.73359000  | -2.97188400 |
| H | -2.78694800 | 4.60905000  | -1.63246000 |
| H | -0.97324500 | 4.51294300  | 0.26098100  |
| H | 0.74210400  | 4.53630400  | 2.24511600  |
| H | 1.89448800  | 2.60955100  | 3.77054300  |
| H | 1.74980300  | -0.02645000 | 3.80774400  |
| H | 1.68154100  | -2.66500300 | 3.86299100  |
| H | 0.41118800  | -4.54716700 | 2.37604900  |
| H | -1.28281200 | -4.45816100 | 0.37651200  |
| H | -3.09698700 | -4.47794000 | -1.52104100 |
| H | -4.40012600 | -2.54265700 | -2.90686300 |
| O | 0.11834200  | -0.04650700 | -0.95358500 |
| S | -2.94899400 | 0.10887200  | 1.96590500  |
| H | -2.20179200 | 0.15793700  | 3.09061800  |
| C | 5.39913900  | 0.16058800  | -1.01501200 |
| C | 4.46242200  | -1.01881600 | -0.69846100 |
| C | 3.45912200  | -0.59408600 | 0.41606700  |
| C | 2.64222000  | -0.00036800 | -0.75105800 |
| C | 3.24615300  | -1.09357400 | -1.70449700 |
| C | 3.46555000  | -0.74327300 | -3.17616800 |
| H | 4.08211100  | -1.51083600 | -3.66113700 |
| H | 2.50424600  | -0.71133000 | -3.70437300 |
| H | 3.95006900  | 0.22453200  | -3.32376000 |
| C | 2.53076900  | -2.45166100 | -1.62512000 |
| H | 3.14318200  | -3.22349600 | -2.10830300 |
| H | 2.33441100  | -2.77723500 | -0.60001700 |
| H | 1.56971000  | -2.40714200 | -2.14929000 |
| C | 3.14036000  | 1.36221000  | -1.13152000 |
| C | 4.64545700  | 1.51503200  | -0.89146300 |

|   |            |             |             |
|---|------------|-------------|-------------|
| H | 5.06303800 | 2.26926500  | -1.56702600 |
| H | 4.78982700 | 1.90276400  | 0.12542900  |
| C | 2.38495800 | 2.32935400  | -1.66454100 |
| H | 2.81640100 | 3.28035200  | -1.96999600 |
| H | 1.31594300 | 2.20033900  | -1.80118700 |
| H | 3.81071900 | 0.09147900  | 1.19177500  |
| H | 2.97678500 | -1.44862400 | 0.89074200  |
| H | 5.01175200 | -1.95790200 | -0.55074800 |
| H | 5.82161200 | 0.04048700  | -2.01917800 |
| H | 6.24544100 | 0.15032400  | -0.31783700 |
| H | 1.27443600 | -0.02214700 | -0.70128000 |

#### Coordinate III

|    |             |             |             |
|----|-------------|-------------|-------------|
| Fe | -1.28387100 | 0.02142100  | 0.29029600  |
| N  | -1.18842500 | -1.96223800 | 0.62654600  |
| C  | -1.81605600 | -2.94739700 | -0.09825700 |
| C  | -1.44325300 | -4.24331000 | 0.40948400  |
| C  | -0.57506100 | -4.03156300 | 1.43834700  |
| C  | -0.41116400 | -2.60522100 | 1.56226600  |
| C  | 0.43509700  | -1.99366000 | 2.47617800  |
| C  | 0.63671400  | -0.62449900 | 2.57543700  |
| C  | 1.48683000  | 0.00329400  | 3.55532300  |
| C  | 1.38674700  | 1.34891500  | 3.36324800  |
| C  | 0.47199700  | 1.54877300  | 2.26781100  |
| N  | 0.04366200  | 0.33373500  | 1.78730100  |
| C  | 0.05841100  | 2.79151200  | 1.81005300  |
| C  | -0.87500100 | 2.99409100  | 0.80429000  |
| C  | -1.27895900 | 4.29157300  | 0.32455700  |
| C  | -2.17525400 | 4.08188700  | -0.67989800 |
| C  | -2.32134000 | 2.65504600  | -0.82055100 |
| N  | -1.53638200 | 2.00952200  | 0.10547600  |

|   |             |             |             |
|---|-------------|-------------|-------------|
| C | -3.11576700 | 2.04268600  | -1.77927100 |
| C | -3.22705300 | 0.67149100  | -1.95260200 |
| C | -4.06835700 | 0.04337600  | -2.94045600 |
| C | -3.93805100 | -1.30250200 | -2.77373900 |
| C | -3.01857300 | -1.50267300 | -1.68168500 |
| C | -2.66677700 | -2.74472200 | -1.17590200 |
| H | -3.09155000 | -3.62151200 | -1.65301400 |
| N | -2.58385900 | -0.28737000 | -1.20634400 |
| H | -4.41778300 | -2.10141200 | -3.32431600 |
| H | -4.67663700 | 0.58021900  | -3.65690300 |
| H | -3.68535800 | 2.68282100  | -2.44451800 |
| H | -2.69150600 | 4.81268700  | -1.28893400 |
| H | -0.90640400 | 5.23061800  | 0.71302700  |
| H | 0.48935000  | 3.66939400  | 2.27952100  |
| H | 1.87062600  | 2.14753600  | 3.91053700  |
| H | 2.07093500  | -0.53264200 | 4.29222900  |
| H | 0.97907700  | -2.63328300 | 3.16302400  |
| H | -0.07380400 | -4.76146700 | 2.06086100  |
| H | -1.80364700 | -5.18325700 | 0.01195300  |
| O | 0.05344200  | -0.01216600 | -0.90066800 |
| H | 0.93818700  | 0.02309900  | -0.46747100 |
| S | -3.03231900 | -0.02665900 | 1.88483100  |
| H | -3.29882500 | 1.29672700  | 1.92830000  |
| C | 5.78378000  | 0.18119500  | -1.01242900 |
| C | 4.85907100  | -0.97658800 | -0.58609000 |
| C | 3.93237500  | -0.49024100 | 0.57414100  |
| C | 3.09260200  | 0.05556400  | -0.58331800 |
| C | 3.57666400  | -1.08657900 | -1.51710300 |
| C | 3.70708100  | -0.80694000 | -3.01325700 |
| H | 4.27262800  | -1.61039000 | -3.50145500 |
| H | 2.71377900  | -0.77344200 | -3.47799900 |

|   |            |             |             |
|---|------------|-------------|-------------|
| H | 4.20213800 | 0.14126700  | -3.23459800 |
| C | 2.84534500 | -2.42521900 | -1.32284900 |
| H | 3.41010100 | -3.23379100 | -1.80305200 |
| H | 2.70593900 | -2.69319700 | -0.27208300 |
| H | 1.85451400 | -2.38232400 | -1.78977400 |
| C | 3.53253600 | 1.39810100  | -1.03990100 |
| C | 5.05483800 | 1.55305800  | -0.90436200 |
| H | 5.43162200 | 2.26717000  | -1.64423400 |
| H | 5.26876800 | 1.98875600  | 0.07995900  |
| C | 2.73076100 | 2.34066100  | -1.54963300 |
| H | 3.12595700 | 3.28740600  | -1.91136400 |
| H | 1.65579000 | 2.19567000  | -1.61144700 |
| H | 4.33700500 | 0.22633900  | 1.29298500  |
| H | 3.46512300 | -1.31565600 | 1.11298500  |
| H | 5.40523600 | -1.91698500 | -0.43102100 |
| H | 6.14188400 | 0.01137900  | -2.03399400 |
| H | 6.67098800 | 0.18900800  | -0.36871100 |

#### Coordinate V

|    |            |             |             |
|----|------------|-------------|-------------|
| Fe | 1.35681500 | -0.02094000 | 0.21469500  |
| N  | 1.52175100 | 0.37172700  | -1.81878900 |
| C  | 1.72256200 | -0.55209700 | -2.81604300 |
| C  | 1.95320400 | 0.12249500  | -4.07004300 |
| C  | 1.91988400 | 1.46232600  | -3.81069800 |
| C  | 1.66830200 | 1.60892100  | -2.39779800 |
| C  | 1.63923700 | 2.81409300  | -1.70385900 |
| C  | 1.43372300 | 2.95541600  | -0.33516600 |
| C  | 1.34093700 | 4.22771700  | 0.33935500  |
| C  | 1.04425800 | 3.96977600  | 1.64314200  |
| C  | 0.95314100 | 2.53630600  | 1.78251900  |
| N  | 1.21517300 | 1.93723200  | 0.56880300  |

|   |             |             |             |
|---|-------------|-------------|-------------|
| C | 0.58265700  | 1.88948800  | 2.95735600  |
| C | 0.42722700  | 0.51546300  | 3.10795200  |
| C | 0.06337600  | -0.15650400 | 4.33240400  |
| C | 0.09673200  | -1.49579600 | 4.07283200  |
| C | 0.48112500  | -1.64403200 | 2.68952500  |
| N | 0.65267800  | -0.40796300 | 2.11806000  |
| C | 0.70273000  | -2.85378000 | 2.04027500  |
| C | 1.09123100  | -2.99901500 | 0.71234400  |
| C | 1.25704700  | -4.27211400 | 0.05365400  |
| C | 1.55222700  | -4.01322400 | -1.25025700 |
| C | 1.57028100  | -2.57860200 | -1.40474500 |
| C | 1.75679000  | -1.92913700 | -2.62121100 |
| H | 1.93838400  | -2.55318100 | -3.49025500 |
| N | 1.30499200  | -1.98008600 | -0.19102400 |
| H | 1.72478900  | -4.71613100 | -2.05497300 |
| H | 1.13748300  | -5.23143500 | 0.54031600  |
| H | 0.55243100  | -3.76381600 | 2.61198800  |
| H | -0.10731400 | -2.31692900 | 4.74802700  |
| H | -0.17390500 | 0.34223300  | 5.26338400  |
| H | 0.39109900  | 2.51363200  | 3.82415200  |
| H | 0.87726700  | 4.67333400  | 2.44847700  |
| H | 1.46751300  | 5.18663500  | -0.14636400 |
| H | 1.78098800  | 3.72487700  | -2.27656600 |
| H | 2.06280200  | 2.28387000  | -4.50089400 |
| H | 2.12855500  | -0.37491200 | -5.01530300 |
| O | -1.18524100 | 0.14962000  | -0.59793700 |
| S | 3.70808900  | -0.13210000 | 0.69809600  |
| H | 3.91162800  | 1.16854100  | 1.00444800  |
| C | -5.30484000 | -0.42788300 | 0.23707000  |
| C | -4.35919300 | 0.75597600  | 0.48947500  |
| C | -3.02320700 | 0.24378900  | 1.10405100  |

|   |             |             |             |
|---|-------------|-------------|-------------|
| C | -2.57208100 | -0.02077900 | -0.35244900 |
| C | -3.55744600 | 1.13703300  | -0.80510000 |
| C | -4.23526900 | 1.02678000  | -2.17406500 |
| H | -5.02138900 | 1.78608800  | -2.27281400 |
| H | -3.50662700 | 1.20572700  | -2.97536900 |
| H | -4.68758700 | 0.04921900  | -2.35818500 |
| C | -2.91283400 | 2.52710700  | -0.69166900 |
| H | -3.68155600 | 3.29862100  | -0.82375200 |
| H | -2.42783000 | 2.70360100  | 0.27204000  |
| H | -2.15800700 | 2.67159900  | -1.47345200 |
| C | -3.13536400 | -1.35567700 | -0.81048100 |
| C | -4.50870200 | -1.68022200 | -0.22470400 |
| H | -5.08952100 | -2.28055800 | -0.93312900 |
| H | -4.34360300 | -2.32545100 | 0.64814000  |
| C | -2.48891100 | -2.18742400 | -1.63289500 |
| H | -2.94188100 | -3.12057600 | -1.95993400 |
| H | -1.48541300 | -1.98588500 | -1.99619700 |
| H | -1.01553800 | 0.12148800  | -1.55437800 |
| H | -3.06209700 | -0.61163700 | 1.78549900  |
| H | -2.43410500 | 1.03852300  | 1.56369500  |
| H | -4.86575900 | 1.58084400  | 1.00235000  |
| H | -6.05686500 | -0.14668400 | -0.50915400 |
| H | -5.85372900 | -0.66534200 | 1.15611300  |

Delta Site – Doublet state

Coordinate I (cis)

|    |             |             |            |
|----|-------------|-------------|------------|
| Fe | -1.46281500 | 0.00757500  | 0.13266300 |
| N  | -0.83911300 | -1.16040200 | 1.65742000 |
| C  | -0.75057300 | -2.52864000 | 1.67289400 |

|   |             |             |             |
|---|-------------|-------------|-------------|
| C | -0.17121800 | -2.98520900 | 2.91307400  |
| C | 0.09182800  | -1.87184000 | 3.65224400  |
| C | -0.32600500 | -0.74190000 | 2.85805400  |
| C | -0.22005600 | 0.58487800  | 3.26338200  |
| C | -0.61518500 | 1.69462500  | 2.52411500  |
| C | -0.48586800 | 3.06014100  | 2.97153700  |
| C | -0.96150000 | 3.84609500  | 1.96673000  |
| C | -1.38267300 | 2.95681200  | 0.91154900  |
| N | -1.17080700 | 1.64944400  | 1.27020300  |
| C | -1.93960100 | 3.37222700  | -0.29392800 |
| C | -2.38742900 | 2.53362900  | -1.30967000 |
| C | -2.99709500 | 2.98772000  | -2.53612900 |
| C | -3.30413300 | 1.87258700  | -3.25427200 |
| C | -2.87754900 | 0.74262700  | -2.46476400 |
| N | -2.32757100 | 1.16321900  | -1.28008900 |
| C | -3.00384800 | -0.58473600 | -2.86019000 |
| C | -2.59914300 | -1.69441100 | -2.12474900 |
| C | -2.74697100 | -3.06057700 | -2.56435100 |
| C | -2.22724600 | -3.84454800 | -1.57975500 |
| C | -1.76667600 | -2.95285700 | -0.54331400 |
| C | -1.17586000 | -3.36662100 | 0.64659200  |
| H | -1.04634600 | -4.43452500 | 0.79137300  |
| N | -2.00425600 | -1.64751300 | -0.89001100 |
| H | -2.15720600 | -4.92355300 | -1.53923200 |
| H | -3.19277800 | -3.35966800 | -3.50379300 |
| H | -3.45819900 | -0.77154000 | -3.82808400 |
| H | -3.77427500 | 1.80124900  | -4.22626600 |
| H | -3.16275100 | 4.02562400  | -2.79333000 |
| H | -2.04744500 | 4.44119100  | -0.44852100 |
| H | -1.03207100 | 4.92507300  | 1.92665000  |
| H | -0.08214600 | 3.35740200  | 3.93038600  |

|   |             |             |             |
|---|-------------|-------------|-------------|
| H | 0.20927400  | 0.77024400  | 4.24289000  |
| H | 0.52367200  | -1.80246200 | 4.64196000  |
| H | -0.00256000 | -4.02304000 | 3.16858600  |
| S | -3.77575300 | -0.11545600 | 1.20173300  |
| H | -4.07627100 | 1.20086900  | 1.14935000  |
| O | 0.01799800  | 0.08992100  | -0.55949500 |
| C | 3.75567400  | -0.67043700 | -2.16271200 |
| C | 5.10037900  | 0.06516400  | -2.03748100 |
| C | 5.10187100  | 1.04035300  | -0.80719000 |
| C | 5.45523200  | -0.24671600 | 0.04188900  |
| C | 6.10001900  | -0.83061200 | -1.25358300 |
| H | 6.03742700  | -1.91356100 | -1.40492000 |
| H | 7.14028400  | -0.52273300 | -1.37584800 |
| C | 4.19278600  | -1.00961900 | 0.35716500  |
| C | 3.43044300  | -1.48799600 | -0.87697600 |
| H | 3.71030800  | -2.53531800 | -1.05318300 |
| C | 3.78622300  | -1.26073500 | 1.60679700  |
| H | 2.86159200  | -1.79561900 | 1.81565000  |
| H | 4.37238500  | -0.94648400 | 2.46798500  |
| H | 6.08324400  | -0.10310300 | 0.92861300  |
| C | 6.27329700  | 2.03422900  | -0.85432600 |
| H | 6.38758500  | 2.53935900  | 0.11326700  |
| H | 6.08504500  | 2.80658500  | -1.61128600 |
| H | 7.23020600  | 1.56218600  | -1.09643900 |
| C | 3.82639600  | 1.81503200  | -0.46388100 |
| H | 3.61976100  | 2.57167000  | -1.23230300 |
| H | 3.94864200  | 2.34275900  | 0.49109100  |
| H | 2.94225300  | 1.17892700  | -0.37385000 |
| H | 5.41983400  | 0.48261300  | -3.00036500 |
| H | 3.79033900  | -1.34972600 | -3.02338300 |
| H | 2.95762300  | 0.05177500  | -2.37152300 |



|   |            |             |             |
|---|------------|-------------|-------------|
| H | 2.35292400 | -1.49045400 | -0.68165000 |
|---|------------|-------------|-------------|

Coordinate II (cis) – TS (-1697.84)

|    |             |             |             |
|----|-------------|-------------|-------------|
| Fe | -1.22461100 | -0.00001900 | 0.22356500  |
| N  | -2.16691100 | 0.37210900  | -1.53619000 |
| C  | -2.32467400 | 1.59953500  | -2.12213700 |
| C  | -2.97629000 | 1.46815900  | -3.40562000 |
| C  | -3.21008200 | 0.13939000  | -3.58838800 |
| C  | -2.69411000 | -0.53457700 | -2.41904800 |
| C  | -2.71541000 | -1.91296200 | -2.22409800 |
| C  | -2.18903400 | -2.58346800 | -1.12307200 |
| C  | -2.18367600 | -4.01894200 | -0.96014700 |
| C  | -1.55768600 | -4.27360500 | 0.22199000  |
| C  | -1.19016100 | -2.99170100 | 0.77845800  |
| N  | -1.58749400 | -1.97703000 | -0.05078800 |
| C  | -0.53652400 | -2.81803500 | 1.99635500  |
| C  | -0.19960400 | -1.60112300 | 2.58365800  |
| C  | 0.40043400  | -1.46985100 | 3.89071200  |
| C  | 0.53171500  | -0.13531900 | 4.12813600  |
| C  | 0.02097500  | 0.54262900  | 2.96074400  |
| N  | -0.41656000 | -0.36485600 | 2.02830900  |
| C  | -0.01186700 | 1.92450800  | 2.79697200  |
| C  | -0.48048300 | 2.58903900  | 1.66620600  |
| C  | -0.48024800 | 4.02181300  | 1.49478600  |
| C  | -1.00275600 | 4.26550000  | 0.26056000  |
| C  | -1.33000800 | 2.98066600  | -0.31208700 |
| C  | -1.92730700 | 2.80955700  | -1.55819400 |
| H  | -2.12191200 | 3.70838400  | -2.13541700 |
| N  | -0.99803300 | 1.97072600  | 0.55641700  |
| H  | -1.16691200 | 5.21706200  | -0.22808500 |
| H  | -0.12282600 | 4.73104600  | 2.22982800  |

|   |             |             |             |
|---|-------------|-------------|-------------|
| H | 0.36693900  | 2.53293600  | 3.61226400  |
| H | 0.93345000  | 0.36004200  | 5.00241700  |
| H | 0.66974000  | -2.30010200 | 4.53048300  |
| H | -0.28896900 | -3.71642500 | 2.55359900  |
| H | -1.35748400 | -5.22887100 | 0.68951300  |
| H | -2.60328300 | -4.72150100 | -1.66832500 |
| H | -3.16545600 | -2.51796400 | -3.00517200 |
| H | -3.68087100 | -0.35535500 | -4.42792800 |
| H | -3.21641800 | 2.29391300  | -4.06260100 |
| S | -3.41852800 | 0.14982300  | 1.31974200  |
| H | -4.15079100 | -0.51676000 | 0.40060400  |
| O | 0.25317500  | -0.17851900 | -0.68134300 |
| C | 3.17492300  | -0.62188000 | 0.81470900  |
| C | 4.51988900  | -0.89423600 | 0.11824700  |
| C | 4.39155900  | -0.84229800 | -1.44620000 |
| C | 4.50232300  | 0.72035400  | -1.26830100 |
| C | 5.31254400  | 0.43754200  | 0.03808800  |
| H | 5.18488400  | 1.14738400  | 0.86291300  |
| H | 6.37938400  | 0.30046700  | -0.14764600 |
| C | 3.19250300  | 1.34373700  | -0.84144300 |
| C | 2.47779400  | 0.63367700  | 0.25662000  |
| H | 2.10334000  | 1.31261400  | 1.02753200  |
| C | 2.73760100  | 2.49610200  | -1.37187100 |
| H | 1.81674700  | 2.96097200  | -1.02702500 |
| H | 3.27987800  | 3.00810200  | -2.16277700 |
| H | 4.97969600  | 1.29024400  | -2.07298600 |
| C | 5.63577400  | -1.41834600 | -2.14397800 |
| H | 5.62378400  | -1.16907000 | -3.21258000 |
| H | 5.64254000  | -2.51250100 | -2.05898000 |
| H | 6.57828100  | -1.04969900 | -1.72887800 |
| C | 3.15337200  | -1.43227400 | -2.12711100 |

|   |            |             |             |
|---|------------|-------------|-------------|
| H | 3.16893400 | -2.52810600 | -2.05514600 |
| H | 3.15482100 | -1.17802600 | -3.19546100 |
| H | 2.20815800 | -1.08481100 | -1.70556400 |
| H | 5.01559500 | -1.77126900 | 0.55177900  |
| H | 3.34814900 | -0.49407500 | 1.89155400  |
| H | 2.51581100 | -1.49438100 | 0.71631000  |
| H | 1.34980800 | 0.25905200  | -0.20353900 |

Coordinate III (cis)

|    |             |             |             |
|----|-------------|-------------|-------------|
| Fe | -1.44376200 | 0.04864600  | 0.25151800  |
| N  | -0.03826300 | 0.19745500  | 1.69678800  |
| C  | 0.51316900  | -0.80563100 | 2.45369300  |
| C  | 1.47889200  | -0.26827700 | 3.38223500  |
| C  | 1.50635100  | 1.07880700  | 3.17694900  |
| C  | 0.55083400  | 1.35719000  | 2.12995600  |
| C  | 0.25066700  | 2.63555400  | 1.66008200  |
| C  | -0.70866700 | 2.96134700  | 0.70343800  |
| C  | -1.00578500 | 4.30823100  | 0.27075300  |
| C  | -1.99491900 | 4.20820700  | -0.65978400 |
| C  | -2.29227400 | 2.80046500  | -0.79372300 |
| N  | -1.50516000 | 2.06004400  | 0.04758000  |
| C  | -3.23604200 | 2.26785800  | -1.67010900 |
| C  | -3.51455300 | 0.91272700  | -1.83465700 |
| C  | -4.47614700 | 0.37694600  | -2.77102400 |
| C  | -4.42969000 | -0.97764900 | -2.64090100 |
| C  | -3.44385700 | -1.26069700 | -1.62176400 |
| N  | -2.90251100 | -0.09803500 | -1.14188800 |
| C  | -3.10673800 | -2.54104800 | -1.18636700 |
| C  | -2.19055500 | -2.86064400 | -0.18568800 |
| C  | -1.92866900 | -4.20303400 | 0.27893200  |
| C  | -1.01634100 | -4.09701100 | 1.28496800  |

|   |             |             |             |
|---|-------------|-------------|-------------|
| C | -0.71786200 | -2.69135100 | 1.42264100  |
| C | 0.18768900  | -2.15568900 | 2.33667700  |
| H | 0.69278300  | -2.84917700 | 3.00194600  |
| N | -1.43960300 | -1.95442000 | 0.51809200  |
| H | -0.57543300 | -4.88345400 | 1.88347800  |
| H | -2.39516400 | -5.09499200 | -0.11869100 |
| H | -3.62414400 | -3.37102800 | -1.65813300 |
| H | -5.00041700 | -1.72780500 | -3.17268600 |
| H | -5.09138400 | 0.97219600  | -3.43316100 |
| H | -3.79277300 | 2.96782700  | -2.28563400 |
| H | -2.48412200 | 4.99831700  | -1.21443400 |
| H | -0.51371300 | 5.19792200  | 0.64168800  |
| H | 0.80422100  | 3.46024800  | 2.09880800  |
| H | 2.10155600  | 1.82714500  | 3.68386000  |
| H | 2.04904500  | -0.85598300 | 4.08981000  |
| S | -3.15391400 | 0.20780100  | 1.96136900  |
| H | -3.98314400 | 1.07817000  | 1.34390300  |
| O | -0.19374600 | -0.03921100 | -1.07240500 |
| H | 0.52653500  | -0.61510000 | -0.75807300 |
| C | 5.23545100  | -0.29682400 | -2.70762400 |
| C | 5.72214800  | 0.23441700  | -1.34654700 |
| C | 4.52777100  | 0.81539300  | -0.50334100 |
| C | 4.24476200  | -0.69202600 | -0.12452200 |
| C | 5.76618900  | -0.95394100 | -0.34583300 |
| H | 6.04433800  | -1.93517900 | -0.74532500 |
| H | 6.36787200  | -0.74813900 | 0.54113700  |
| C | 3.49848400  | -1.39184400 | -1.24879100 |
| C | 4.03740900  | -1.18669600 | -2.52960100 |
| H | 3.58429100  | -1.65717600 | -3.39950000 |
| C | 2.38947600  | -2.18194400 | -1.01865100 |
| H | 1.89357500  | -2.70497800 | -1.83216000 |

|   |            |             |             |
|---|------------|-------------|-------------|
| H | 2.02019300 | -2.35991300 | -0.01310800 |
| H | 3.80527900 | -0.89799200 | 0.85691700  |
| C | 5.01472200 | 1.62589400  | 0.70891600  |
| H | 4.18313300 | 1.81264500  | 1.39992200  |
| H | 5.40143000 | 2.59967100  | 0.38260700  |
| H | 5.80848900 | 1.12838700  | 1.27355000  |
| C | 3.43857400 | 1.62579200  | -1.21146500 |
| H | 3.84563000 | 2.58253000  | -1.56343100 |
| H | 2.61964400 | 1.85220000  | -0.51676800 |
| H | 3.00519200 | 1.10880400  | -2.07160000 |
| H | 6.61451600 | 0.86096400  | -1.45643400 |
| H | 6.04594100 | -0.85471700 | -3.20391000 |
| H | 4.99287600 | 0.53023400  | -3.39379000 |

Coordinate V (cis)

|    |             |             |             |
|----|-------------|-------------|-------------|
| Fe | 1.31044600  | 0.06450600  | 0.27348000  |
| N  | 1.31633200  | 2.02810600  | -0.19860600 |
| C  | 1.78428200  | 2.62529000  | -1.34765900 |
| C  | 1.67701200  | 4.06002600  | -1.24418800 |
| C  | 1.15009300  | 4.32719600  | -0.01654400 |
| C  | 0.93361600  | 3.05580200  | 0.63197000  |
| C  | 0.41597700  | 2.91177200  | 1.91322300  |
| C  | 0.20016100  | 1.70403800  | 2.56608100  |
| C  | -0.35315600 | 1.59103900  | 3.89497300  |
| C  | -0.42236500 | 0.26090400  | 4.18246500  |
| C  | 0.09033200  | -0.44028900 | 3.03070800  |
| N  | 0.45983300  | 0.45507600  | 2.05319700  |
| C  | 0.19628600  | -1.82216300 | 2.93220800  |
| C  | 0.69930000  | -2.49701900 | 1.82673800  |
| C  | 0.82484300  | -3.93101900 | 1.73004000  |
| C  | 1.36954400  | -4.19550300 | 0.50976800  |

|   |             |             |             |
|---|-------------|-------------|-------------|
| C | 1.57736100  | -2.92329000 | -0.14098000 |
| N | 1.15603800  | -1.89978000 | 0.67420800  |
| C | 2.12361600  | -2.77846000 | -1.41070000 |
| C | 2.33689400  | -1.57155500 | -2.06565800 |
| C | 2.90240900  | -1.45818100 | -3.39003500 |
| C | 2.95099000  | -0.12949800 | -3.68550300 |
| C | 2.41509600  | 0.56990400  | -2.54223500 |
| C | 2.29665200  | 1.95102300  | -2.44876000 |
| H | 2.63106300  | 2.54486000  | -3.29336000 |
| N | 2.04288600  | -0.32523800 | -1.56723800 |
| H | 3.30933300  | 0.34994200  | -4.58759600 |
| H | 3.21245300  | -2.29753800 | -3.99956200 |
| H | 2.40664900  | -3.68540500 | -1.93583100 |
| H | 1.61351200  | -5.15575400 | 0.07328100  |
| H | 0.52905200  | -4.62814100 | 2.50365000  |
| H | -0.13159200 | -2.41532600 | 3.77984700  |
| H | -0.78428400 | -0.21777200 | 5.08351100  |
| H | -0.64776700 | 2.43110100  | 4.51112000  |
| H | 0.15659400  | 3.81926100  | 2.44952100  |
| H | 0.92207000  | 5.28894100  | 0.42523900  |
| H | 1.97127300  | 4.75626400  | -2.01919500 |
| S | 3.41313000  | 0.18200300  | 1.13728400  |
| H | 3.20531800  | -0.53187100 | 2.26583200  |
| C | -2.71913000 | 0.74673500  | 0.43518600  |
| C | -4.23467300 | 0.48160700  | 0.37900200  |
| C | -4.73752100 | 0.34190100  | -1.10165900 |
| C | -4.21980600 | -1.15066100 | -0.99096800 |
| C | -4.49014600 | -1.04453300 | 0.54231400  |
| H | -3.83708600 | -1.60570700 | 1.21857400  |
| H | -5.52537900 | -1.27744800 | 0.79523700  |
| C | -2.73144900 | -1.18715300 | -1.24359300 |

|   |             |             |             |
|---|-------------|-------------|-------------|
| C | -1.92417600 | -0.43260600 | -0.18567700 |
| H | -1.67532500 | -1.13777900 | 0.61100600  |
| C | -2.16442800 | -1.81180200 | -2.27979600 |
| H | -1.09123400 | -1.78837800 | -2.44337600 |
| H | -2.76489400 | -2.36307900 | -2.99938300 |
| H | -4.75109400 | -1.91167800 | -1.57239000 |
| C | -6.27021800 | 0.41348100  | -1.20203300 |
| H | -6.60462000 | 0.07440600  | -2.19034100 |
| H | -6.60771300 | 1.44994200  | -1.07498100 |
| H | -6.78385500 | -0.19412800 | -0.45161700 |
| C | -4.14889500 | 1.24635200  | -2.18711800 |
| H | -4.43340400 | 2.29155500  | -2.01096900 |
| H | -4.53893700 | 0.95957700  | -3.17188900 |
| H | -3.05888600 | 1.20168100  | -2.25177100 |
| H | -4.78181200 | 1.17527800  | 1.02769800  |
| H | -2.39435400 | 0.88419500  | 1.47128300  |
| H | -2.47629100 | 1.67665200  | -0.09431200 |
| O | -0.62884500 | -0.03284700 | -0.67390500 |
| H | -0.71634000 | 0.69274300  | -1.31536500 |

Coordinate I (trans)

|    |            |             |             |
|----|------------|-------------|-------------|
| Fe | 1.45284200 | 0.05421500  | 0.17468700  |
| N  | 2.64324500 | 0.13839700  | -1.45499200 |
| C  | 3.18701700 | -0.92294700 | -2.13402400 |
| C  | 3.89734000 | -0.46490300 | -3.30359000 |
| C  | 3.77022800 | 0.89010500  | -3.33114800 |
| C  | 2.98401100 | 1.25427900  | -2.17735200 |
| C  | 2.63470700 | 2.55780500  | -1.84100300 |
| C  | 1.90802800 | 2.93678700  | -0.71657000 |
| C  | 1.58859500 | 4.30081700  | -0.37157600 |
| C  | 0.88222500 | 4.25257300  | 0.79149500  |

|   |             |             |             |
|---|-------------|-------------|-------------|
| C | 0.77078500  | 2.85940700  | 1.14949500  |
| N | 1.40766900  | 2.07188400  | 0.22362700  |
| C | 0.10005700  | 2.38822400  | 2.27321500  |
| C | -0.03165600 | 1.05269100  | 2.64134900  |
| C | -0.73374100 | 0.59671100  | 3.81649500  |
| C | -0.64013500 | -0.76179100 | 3.82304000  |
| C | 0.12099800  | -1.12752900 | 2.65272000  |
| N | 0.48418500  | -0.01036700 | 1.94561100  |
| C | 0.45363000  | -2.43379100 | 2.30546400  |
| C | 1.20953000  | -2.80928400 | 1.19953400  |
| C | 1.56412000  | -4.17007600 | 0.87700400  |
| C | 2.30458500  | -4.11876300 | -0.26450300 |
| C | 2.39761800  | -2.72712100 | -0.63367900 |
| C | 3.07100200  | -2.25609300 | -1.75646400 |
| H | 3.54996400  | -2.99473000 | -2.39147900 |
| N | 1.72952900  | -1.94300300 | 0.27194100  |
| H | 2.75514800  | -4.93284500 | -0.81697500 |
| H | 1.27841800  | -5.03504400 | 1.46092600  |
| H | 0.10310000  | -3.22658800 | 2.95864600  |
| H | -1.03649100 | -1.46317300 | 4.54522000  |
| H | -1.22464600 | 1.24476600  | 4.53051900  |
| H | -0.36098300 | 3.12803900  | 2.91987700  |
| H | 0.46740000  | 5.07010000  | 1.36642000  |
| H | 1.87826200  | 5.16653800  | -0.95264100 |
| H | 2.96832200  | 3.34827900  | -2.50556600 |
| H | 4.16700900  | 1.59168700  | -4.05293500 |
| H | 4.41875200  | -1.10976700 | -3.99858700 |
| S | 3.61269400  | 0.21488900  | 1.52618900  |
| H | 4.14418600  | 1.28607000  | 0.89656600  |
| O | 0.07910100  | -0.06101400 | -0.70896700 |
| C | -3.97807900 | -0.76262500 | 0.84782700  |



|   |             |             |             |
|---|-------------|-------------|-------------|
| C | -4.56547100 | 0.57274600  | 0.35815200  |
| C | -3.61517800 | 1.18755900  | -0.70893000 |
| C | -4.34866100 | 0.27787300  | -1.74335500 |
| C | -5.61070700 | 0.34599600  | -0.79161300 |
| C | -3.75591100 | -1.10904300 | -1.69588400 |
| C | -3.26442300 | -1.52020200 | -0.31073700 |
| H | -3.34131800 | -2.60584200 | -0.18143000 |
| C | -3.65886400 | -1.89926200 | -2.77178500 |
| H | -3.25636300 | -2.90860500 | -2.70869400 |
| H | -3.97557200 | -1.56061100 | -3.75603100 |
| H | -4.47778700 | 0.63775400  | -2.77061500 |
| H | -4.88304200 | 1.20325100  | 1.19792700  |
| H | -4.77271500 | -1.37933800 | 1.28476900  |
| H | -3.25644000 | -0.57274200 | 1.65225300  |
| H | -2.19315200 | -1.28357000 | -0.26586500 |
| C | -6.54374200 | -0.86584000 | -0.72792800 |
| H | -7.25810300 | -0.75756800 | 0.09876000  |
| H | -7.12513100 | -0.94697600 | -1.65557000 |
| H | -6.01457500 | -1.81251300 | -0.59368700 |
| C | -6.46273000 | 1.59733200  | -1.05760800 |
| H | -7.20427100 | 1.72759000  | -0.25875300 |
| H | -5.87342300 | 2.51748100  | -1.11286400 |
| H | -7.00960100 | 1.49599400  | -2.00379200 |
| H | -2.53834600 | 1.03581400  | -0.58114800 |
| H | -3.80187800 | 2.24864000  | -0.88595900 |

Coordinate II (trans) – TS (-1661.71)

|    |             |            |            |
|----|-------------|------------|------------|
| Fe | -1.27880700 | 0.00789600 | 0.20876200 |
| N  | -0.72563000 | 1.67336100 | 1.19205200 |
| C  | -0.15826500 | 1.77370300 | 2.43799100 |
| C  | 0.09007200  | 3.15542100 | 2.77230000 |

|   |             |             |             |
|---|-------------|-------------|-------------|
| C | -0.33186500 | 3.89426600  | 1.70837100  |
| C | -0.84534800 | 2.96089300  | 0.73332800  |
| C | -1.40861800 | 3.33356200  | -0.48492100 |
| C | -1.98724600 | 2.47919100  | -1.42018900 |
| C | -2.59874600 | 2.91090000  | -2.65645200 |
| C | -3.05520500 | 1.78819900  | -3.27691500 |
| C | -2.71384500 | 0.67593400  | -2.42031400 |
| N | -2.07211700 | 1.11816100  | -1.29283400 |
| C | -2.98502500 | -0.65924400 | -2.70873800 |
| C | -2.62977300 | -1.74726600 | -1.91612300 |
| C | -2.88350400 | -3.12894000 | -2.25363600 |
| C | -2.35897100 | -3.87793400 | -1.24473400 |
| C | -1.79362200 | -2.94924800 | -0.29253100 |
| N | -1.97350100 | -1.65958500 | -0.71545200 |
| C | -1.16567700 | -3.31996600 | 0.89467400  |
| C | -0.64263200 | -2.45693800 | 1.85412800  |
| C | -0.07529100 | -2.88814500 | 3.11026400  |
| C | 0.27764400  | -1.76043800 | 3.78711600  |
| C | -0.06571000 | -0.64584100 | 2.93722400  |
| C | 0.14524500  | 0.69211200  | 3.25974200  |
| H | 0.59118800  | 0.90847800  | 4.22549700  |
| N | -0.62209000 | -1.08728700 | 1.76345800  |
| H | 0.72852100  | -1.67255300 | 4.76692600  |
| H | 0.02250700  | -3.92059700 | 3.41957600  |
| H | -1.09919600 | -4.38339100 | 1.10366700  |
| H | -2.34830100 | -4.95471000 | -1.13677400 |
| H | -3.39216700 | -3.46139600 | -3.14913100 |
| H | -3.50214200 | -0.87101200 | -3.63958200 |
| H | -3.57119700 | 1.70135400  | -4.22419100 |
| H | -2.66280900 | 3.93957300  | -2.98649900 |
| H | -1.42012200 | 4.39467100  | -0.71505800 |

|   |             |             |             |
|---|-------------|-------------|-------------|
| H | -0.31411200 | 4.96891200  | 1.58207200  |
| H | 0.52910400  | 3.49576600  | 3.70101600  |
| S | -3.45914100 | 0.17152100  | 1.33862800  |
| H | -4.25646600 | -0.09025400 | 0.27981100  |
| O | 0.17868600  | -0.13614100 | -0.72949700 |
| C | 3.06985900  | -1.29417000 | 0.23158200  |
| C | 3.96283600  | -1.46287000 | -1.00974400 |
| C | 3.31093600  | -0.70484400 | -2.20054700 |
| C | 4.01607900  | 0.57056000  | -1.64512300 |
| C | 5.11268100  | -0.39374400 | -1.03607000 |
| C | 3.17971900  | 1.14662900  | -0.52633000 |
| C | 2.49286600  | 0.13058800  | 0.31019300  |
| H | 2.26426300  | 0.47083600  | 1.32362900  |
| C | 3.06342700  | 2.47239500  | -0.30751700 |
| H | 2.47147700  | 2.86641800  | 0.51534100  |
| H | 3.56256000  | 3.19737200  | -0.94579300 |
| H | 4.35427900  | 1.34075000  | -2.34687300 |
| H | 4.25361500  | -2.51052100 | -1.15229600 |
| H | 3.63930800  | -1.51749100 | 1.14423800  |
| H | 2.25059400  | -2.02379800 | 0.19841300  |
| H | 1.32065200  | 0.04147600  | -0.16778700 |
| C | 5.79470700  | 0.00508500  | 0.27546800  |
| H | 6.39040400  | -0.83027400 | 0.66578100  |
| H | 6.47933800  | 0.84652200  | 0.10770800  |
| H | 5.09155600  | 0.30807300  | 1.05563900  |
| C | 6.20367600  | -0.73928600 | -2.06179600 |
| H | 6.82492600  | -1.56424000 | -1.69005900 |
| H | 5.80272400  | -1.04079200 | -3.03392600 |
| H | 6.86186500  | 0.12315500  | -2.22660100 |
| H | 2.21789200  | -0.68996800 | -2.24791000 |
| H | 3.70642300  | -1.00876800 | -3.17148100 |

Coordinate III (trans)

|    |             |             |             |
|----|-------------|-------------|-------------|
| Fe | -1.42204900 | -0.01498900 | 0.23093400  |
| N  | -2.64649800 | -0.63187200 | -1.25349300 |
| C  | -3.29808300 | 0.17498000  | -2.14794600 |
| C  | -4.06156900 | -0.62133800 | -3.08310200 |
| C  | -3.85914900 | -1.92376200 | -2.74083400 |
| C  | -2.97147100 | -1.91609900 | -1.59990300 |
| C  | -2.50752100 | -3.05776600 | -0.94914900 |
| C  | -1.64456900 | -3.06969400 | 0.14320900  |
| C  | -1.15873300 | -4.26428500 | 0.79603600  |
| C  | -0.33660400 | -3.85048600 | 1.79967400  |
| C  | -0.32683400 | -2.40476300 | 1.75635400  |
| N  | -1.13015500 | -1.95159100 | 0.74599500  |
| C  | 0.39601200  | -1.59766400 | 2.63569400  |
| C  | 0.42023400  | -0.20387000 | 2.64571700  |
| C  | 1.13961800  | 0.59257700  | 3.61314300  |
| C  | 0.90443300  | 1.89824200  | 3.29836200  |
| C  | 0.04523500  | 1.89380800  | 2.13755000  |
| N  | -0.23551700 | 0.60636100  | 1.75406100  |
| C  | -0.42836800 | 3.03401900  | 1.49247000  |
| C  | -1.26654600 | 3.04175100  | 0.37819600  |
| C  | -1.73929500 | 4.23417100  | -0.28564700 |
| C  | -2.52575500 | 3.81805100  | -1.31718700 |
| C  | -2.53276100 | 2.37362700  | -1.27646000 |
| C  | -3.24257700 | 1.56722600  | -2.16323400 |
| H  | -3.81382000 | 2.07287700  | -2.93599600 |
| N  | -1.75928000 | 1.92173600  | -0.23810000 |
| H  | -3.05940100 | 4.41678300  | -2.04401200 |
| H  | -1.49217300 | 5.24531500  | 0.01089300  |
| H  | -0.12118500 | 3.99592000  | 1.89121000  |

|   |             |             |             |
|---|-------------|-------------|-------------|
| H | 1.26844800  | 2.78869500  | 3.79441900  |
| H | 1.73692500  | 0.19058400  | 4.42133100  |
| H | 0.97688000  | -2.10354400 | 3.40106400  |
| H | 0.21713100  | -4.45014000 | 2.51055400  |
| H | -1.42072000 | -5.27464600 | 0.50967000  |
| H | -2.84203500 | -4.01795400 | -1.32989600 |
| H | -4.26095100 | -2.81536500 | -3.20467800 |
| H | -4.66477500 | -0.21933500 | -3.88694300 |
| S | -3.30404200 | 0.05917100  | 1.74539600  |
| H | -3.91505200 | -1.08832600 | 1.37523500  |
| O | 0.00046400  | -0.09842200 | -0.92159400 |
| C | 3.65681500  | -0.75767800 | 0.67179900  |
| C | 4.26153300  | -1.36017800 | -0.60980900 |
| C | 3.30969200  | -1.02866500 | -1.79326100 |
| C | 4.04163000  | 0.34770100  | -1.86452800 |
| C | 5.30816600  | -0.38017800 | -1.25871300 |
| C | 3.41393900  | 1.25102300  | -0.81809400 |
| C | 3.22028100  | 0.65146900  | 0.44250800  |
| H | 2.79431800  | 1.22111300  | 1.26428000  |
| C | 3.06469100  | 2.56123000  | -1.05291900 |
| H | 2.62061000  | 3.17229000  | -0.27209200 |
| H | 3.22131500  | 3.02554700  | -2.02184000 |
| H | 4.14993400  | 0.84791200  | -2.83194200 |
| H | 4.56924600  | -2.40004200 | -0.45567300 |
| H | 4.36263700  | -0.79101400 | 1.51720400  |
| H | 2.79041400  | -1.35457800 | 1.01047100  |
| H | 0.57737400  | 0.65192100  | -0.70146200 |
| C | 6.26095800  | 0.40723200  | -0.35451500 |
| H | 6.98785100  | -0.26980300 | 0.11179700  |
| H | 6.82521900  | 1.14078500  | -0.94434700 |
| H | 5.75338300  | 0.95247900  | 0.44597300  |

|   |            |             |             |
|---|------------|-------------|-------------|
| C | 6.14418100 | -1.06844300 | -2.34946200 |
| H | 6.87903700 | -1.74266500 | -1.89196800 |
| H | 5.54449700 | -1.65853700 | -3.04804000 |
| H | 6.69686400 | -0.32214000 | -2.93355700 |
| H | 2.23657100 | -1.00318800 | -1.58003600 |
| H | 3.49033800 | -1.64646400 | -2.67441400 |

Coordinate V (trans)

|    |             |             |             |
|----|-------------|-------------|-------------|
| Fe | -1.29276100 | 0.06239000  | 0.26233100  |
| N  | -0.54993800 | 1.06684400  | 1.83823100  |
| C  | -0.10644100 | 0.55537600  | 3.03601000  |
| C  | 0.27011800  | 1.62542900  | 3.92791800  |
| C  | 0.04082800  | 2.79084500  | 3.26119600  |
| C  | -0.47581000 | 2.43368000  | 1.96089300  |
| C  | -0.83457800 | 3.35485900  | 0.98415400  |
| C  | -1.33403600 | 3.04140300  | -0.27411800 |
| C  | -1.68554600 | 4.02299700  | -1.27363800 |
| C  | -2.12376700 | 3.33528300  | -2.36444900 |
| C  | -2.04058600 | 1.93296500  | -2.03278600 |
| N  | -1.55533600 | 1.77367000  | -0.75603000 |
| C  | -2.40819300 | 0.90119700  | -2.88754500 |
| C  | -2.33741500 | -0.44959700 | -2.57244500 |
| C  | -2.74906600 | -1.51833900 | -3.44785900 |
| C  | -2.54658100 | -2.68345500 | -2.77025100 |
| C  | -2.00981600 | -2.32969500 | -1.47889000 |
| N  | -1.87883400 | -0.96191600 | -1.37807900 |
| C  | -1.67241200 | -3.24795700 | -0.49229100 |
| C  | -1.15919100 | -2.93333600 | 0.76084700  |
| C  | -0.81890400 | -3.91422200 | 1.76438700  |
| C  | -0.35797600 | -3.22787300 | 2.84721700  |
| C  | -0.41550300 | -1.82742700 | 2.50676400  |
| C  | -0.03901700 | -0.79460000 | 3.35624700  |

|   |             |             |             |
|---|-------------|-------------|-------------|
| H | 0.32868900  | -1.06128600 | 4.34192500  |
| N | -0.89919800 | -1.66610300 | 1.22811900  |
| H | -0.00684000 | -3.61686500 | 3.79449300  |
| H | -0.92472500 | -4.98423900 | 1.63819700  |
| H | -1.82332700 | -4.29881200 | -0.71831700 |
| H | -2.73639000 | -3.69709300 | -3.09978900 |
| H | -3.13973800 | -1.37845900 | -4.44770600 |
| H | -2.78540900 | 1.17036200  | -3.86895100 |
| H | -2.47132000 | 3.72319500  | -3.31351300 |
| H | -1.59814200 | 5.09384000  | -1.14050900 |
| H | -0.71375200 | 4.40669400  | 1.22361300  |
| H | 0.20160100  | 3.80616300  | 3.60089200  |
| H | 0.65663800  | 1.48432000  | 4.92921000  |
| S | -3.39979200 | 0.14708800  | 1.12170700  |
| H | -4.05941600 | 0.44851800  | -0.01870200 |
| C | 2.66287400  | 0.90798700  | 0.36872100  |
| C | 3.80295800  | 1.26814300  | -0.59826500 |
| C | 4.85431700  | 0.10685000  | -0.69976200 |
| C | 3.84647500  | -0.52830500 | -1.74165700 |
| C | 3.36740400  | 0.92410400  | -2.04944900 |
| H | 2.31287300  | 1.06148500  | -2.30412000 |
| H | 3.98180400  | 1.40985900  | -2.80949700 |
| C | 2.75784500  | -1.26172300 | -1.00397700 |
| C | 1.94789800  | -0.40624600 | -0.02943400 |
| C | 2.47976600  | -2.56118000 | -1.16647100 |
| H | 1.70713000  | -3.06024900 | -0.58525200 |
| H | 3.01821900  | -3.17039300 | -1.88851300 |
| H | 4.27193600  | -1.13361700 | -2.54929900 |
| C | 6.15987700  | 0.56048400  | -1.37119000 |
| H | 6.77420200  | -0.30769000 | -1.64082900 |
| H | 6.74487600  | 1.17909600  | -0.67871600 |

|   |            |             |             |
|---|------------|-------------|-------------|
| H | 5.99711100 | 1.14706000  | -2.28005000 |
| C | 5.21171400 | -0.69473700 | 0.55494800  |
| H | 5.76671500 | -0.06763000 | 1.26437200  |
| H | 5.85560500 | -1.54374700 | 0.29228400  |
| H | 4.34121300 | -1.09960000 | 1.07866300  |
| H | 4.19006400 | 2.27293600  | -0.39241000 |
| H | 1.91451900 | 1.70629800  | 0.38139800  |
| H | 3.04540200 | 0.81984000  | 1.39174100  |
| O | 0.68101400 | -0.04487100 | -0.68062100 |
| H | 1.68706000 | -0.99064800 | 0.85584100  |
| H | 0.48346000 | -0.72082400 | -1.35405200 |

#### Delta Site – Quartet state

##### Coordinate I (cis)

|    |             |             |             |
|----|-------------|-------------|-------------|
| Fe | -1.46470400 | 0.00608200  | 0.13290700  |
| N  | -1.25763400 | 1.70588900  | 1.20316500  |
| C  | -0.72061700 | 1.83791300  | 2.45812600  |
| C  | -0.67310900 | 3.22692800  | 2.84552700  |
| C  | -1.18681200 | 3.93858400  | 1.80450700  |
| C  | -1.54546100 | 2.98034100  | 0.78715300  |
| C  | -2.10649800 | 3.31273500  | -0.44221000 |
| C  | -2.47400900 | 2.41388300  | -1.43787600 |
| C  | -3.05965300 | 2.79126500  | -2.70157700 |
| C  | -3.26446200 | 1.63828200  | -3.39591000 |
| C  | -2.80453800 | 0.56155900  | -2.55254600 |
| N  | -2.33102700 | 1.05118300  | -1.36150700 |
| C  | -2.84941600 | -0.78529700 | -2.89836100 |
| C  | -2.43902400 | -1.84198300 | -2.09152300 |
| C  | -2.52114000 | -3.23376200 | -2.46278200 |
| C  | -2.02706700 | -3.94644500 | -1.41320600 |



|   |             |             |             |
|---|-------------|-------------|-------------|
| C | -1.64378300 | -2.98690500 | -0.40618100 |
| N | -1.90869400 | -1.70960800 | -0.83282300 |
| C | -1.07750100 | -3.31867600 | 0.82015100  |
| C | -0.69960900 | -2.41868700 | 1.81188500  |
| C | -0.12585800 | -2.79775400 | 3.08054400  |
| C | 0.09757900  | -1.64273800 | 3.76692600  |
| C | -0.34026800 | -0.56495500 | 2.91290400  |
| C | -0.28778300 | 0.78282300  | 3.25535700  |
| H | 0.11951600  | 1.03218300  | 4.23009000  |
| N | -0.82448500 | -1.05579700 | 1.72790700  |
| H | 0.51281600  | -1.51355300 | 4.75768300  |
| H | 0.06799200  | -3.81677600 | 3.38855900  |
| H | -0.91950900 | -4.37330400 | 1.02274600  |
| H | -1.92400700 | -5.01872900 | -1.31145700 |
| H | -2.91024400 | -3.59719500 | -3.40475700 |
| H | -3.24936400 | -1.03394100 | -3.87632800 |
| H | -3.68761100 | 1.50867100  | -4.38326500 |
| H | -3.27820600 | 3.80852700  | -2.99871100 |
| H | -2.27589200 | 4.36650900  | -0.63991300 |
| H | -1.32034500 | 5.00867700  | 1.71600200  |
| H | -0.29620700 | 3.58895900  | 3.79299900  |
| O | 0.03121100  | 0.11091000  | -0.52498100 |
| S | -3.77511900 | -0.14948600 | 1.15539800  |
| H | -4.44635700 | -0.53732800 | 0.04870000  |
| C | 3.76688500  | -0.86435100 | -2.01836600 |
| C | 5.09199800  | -0.08375700 | -2.00304900 |
| C | 5.06792200  | 1.05538400  | -0.92309500 |
| C | 5.45415000  | -0.08914800 | 0.09828700  |
| C | 6.11443900  | -0.83354200 | -1.10378900 |
| H | 6.08019000  | -1.92824600 | -1.10028600 |
| H | 7.14633300  | -0.51923100 | -1.27184500 |

|   |            |             |             |
|---|------------|-------------|-------------|
| C | 4.21244200 | -0.83288000 | 0.52249700  |
| C | 3.46367600 | -1.50091500 | -0.62910300 |
| H | 3.77224900 | -2.55460900 | -0.65684800 |
| H | 2.38659500 | -1.50545200 | -0.43156600 |
| C | 3.81345600 | -0.91702400 | 1.79672200  |
| H | 2.90423900 | -1.44262100 | 2.08264700  |
| H | 4.39122800 | -0.46910700 | 2.60267100  |
| H | 6.07787500 | 0.19455100  | 0.95373600  |
| C | 6.21324700 | 2.06240700  | -1.11401000 |
| H | 6.31334000 | 2.70243800  | -0.22813000 |
| H | 6.00560800 | 2.71452400  | -1.97226900 |
| H | 7.18246600 | 1.58599400  | -1.28939100 |
| C | 3.77274300 | 1.83808800  | -0.68912600 |
| H | 3.54748600 | 2.47264600  | -1.55649800 |
| H | 3.88105800 | 2.49910000  | 0.18081600  |
| H | 2.90480900 | 1.19926100  | -0.50723900 |
| H | 5.40068700 | 0.20127200  | -3.01643200 |
| H | 3.81918700 | -1.65690700 | -2.77501500 |
| H | 2.94989800 | -0.19984000 | -2.32323800 |

Coordinate II (cis) – TS (-1858.04)

|    |             |             |             |
|----|-------------|-------------|-------------|
| Fe | -1.22974600 | -0.00575100 | 0.20468000  |
| N  | -2.17660100 | 0.44487700  | -1.51507300 |
| C  | -2.32926000 | 1.69751800  | -2.05524500 |
| C  | -3.01308600 | 1.61971600  | -3.32583700 |
| C  | -3.27276500 | 0.30224100  | -3.54891100 |
| C  | -2.74098000 | -0.41999000 | -2.41653700 |
| C  | -2.78107900 | -1.80419900 | -2.26811000 |
| C  | -2.25804800 | -2.51929200 | -1.19349300 |
| C  | -2.29040500 | -3.95778000 | -1.06812300 |
| C  | -1.65942600 | -4.26013900 | 0.09973900  |

|   |             |             |             |
|---|-------------|-------------|-------------|
| C | -1.24974300 | -3.00494300 | 0.68615000  |
| N | -1.62718100 | -1.95581000 | -0.11483800 |
| C | -0.58111500 | -2.88552500 | 1.90060200  |
| C | -0.21071800 | -1.69417500 | 2.52468500  |
| C | 0.40592900  | -1.61468300 | 3.82835400  |
| C | 0.55907600  | -0.28951700 | 4.10524200  |
| C | 0.04487800  | 0.42997300  | 2.96396100  |
| N | -0.41624800 | -0.44176000 | 2.01187100  |
| C | 0.03149100  | 1.81795900  | 2.84133400  |
| C | -0.42893000 | 2.52971600  | 1.73529200  |
| C | -0.39407300 | 3.96741900  | 1.61103200  |
| C | -0.91863600 | 4.26351600  | 0.38863400  |
| C | -1.28060400 | 3.00457800  | -0.21990200 |
| C | -1.90003300 | 2.88140500  | -1.46376400 |
| H | -2.08722000 | 3.80025300  | -2.01115100 |
| N | -0.96902200 | 1.96200700  | 0.61040300  |
| H | -1.06312500 | 5.23380200  | -0.06825000 |
| H | -0.01446600 | 4.64357300  | 2.36586500  |
| H | 0.42817400  | 2.39376200  | 3.67184000  |
| H | 0.97803600  | 0.17279500  | 4.98947100  |
| H | 0.67015600  | -2.46802300 | 4.43915100  |
| H | -0.34947600 | -3.80717700 | 2.42580200  |
| H | -1.48197400 | -5.23251800 | 0.54036800  |
| H | -2.73801400 | -4.62959300 | -1.78881700 |
| H | -3.25387500 | -2.37521400 | -3.06117300 |
| H | -3.77220800 | -0.15527400 | -4.39292400 |
| H | -3.25602200 | 2.47122800  | -3.94793000 |
| S | -3.39840400 | 0.15722000  | 1.36634400  |
| H | -4.16591700 | -0.45973600 | 0.44055000  |
| O | 0.28730800  | -0.14412900 | -0.65417700 |
| C | 3.21659000  | -0.65596000 | 0.80597400  |

|   |            |             |             |
|---|------------|-------------|-------------|
| C | 4.53802200 | -0.93935100 | 0.06927000  |
| C | 4.37326300 | -0.84744700 | -1.49012200 |
| C | 4.51900200 | 0.70781700  | -1.27801500 |
| C | 5.35602000 | 0.37773900  | 0.00022900  |
| H | 5.26303600 | 1.07009000  | 0.84432900  |
| H | 6.41506000 | 0.22366300  | -0.21507100 |
| C | 3.23433400 | 1.34846600  | -0.80063900 |
| C | 2.53251800 | 0.62567100  | 0.29323200  |
| H | 2.18058100 | 1.29065500  | 1.08575800  |
| C | 2.79719500 | 2.52672100  | -1.29028300 |
| H | 1.89971200 | 3.00802800  | -0.90802500 |
| H | 3.33197900 | 3.04400800  | -2.08292100 |
| H | 4.98788800 | 1.28729700  | -2.08101000 |
| C | 5.58939000 | -1.43020600 | -2.23086100 |
| H | 5.55747800 | -1.15481200 | -3.29268000 |
| H | 5.57654500 | -2.52610800 | -2.17247400 |
| H | 6.54857100 | -1.09010600 | -1.82982100 |
| C | 3.10884900 | -1.39803700 | -2.15519400 |
| H | 3.10354600 | -2.49535400 | -2.10588800 |
| H | 3.09284300 | -1.12226100 | -3.21821500 |
| H | 2.18026200 | -1.04013000 | -1.70629900 |
| H | 5.02650500 | -1.83633500 | 0.46923200  |
| H | 3.42169300 | -0.55789300 | 1.88049600  |
| H | 2.53766300 | -1.51283800 | 0.70435500  |
| H | 1.36939300 | 0.27076600  | -0.16303200 |

Coordinate III (cis)

|    |            |             |             |
|----|------------|-------------|-------------|
| Fe | 1.48645100 | 0.04025400  | 0.23873400  |
| N  | 2.68771000 | -1.26796800 | -0.70686200 |
| C  | 2.70030300 | -2.63620900 | -0.55706700 |
| C  | 3.65847700 | -3.21854700 | -1.46161800 |

|   |             |             |             |
|---|-------------|-------------|-------------|
| C | 4.21058300  | -2.19335800 | -2.16963500 |
| C | 3.59254700  | -0.97936200 | -1.70120700 |
| C | 3.85825800  | 0.28160400  | -2.21546100 |
| C | 3.24242400  | 1.45045100  | -1.79585600 |
| C | 3.55092100  | 2.76008300  | -2.31224900 |
| C | 2.78443400  | 3.64958100  | -1.62126700 |
| C | 2.00413000  | 2.88757700  | -0.67922800 |
| N | 2.28269800  | 1.54744400  | -0.81486900 |
| C | 1.13306800  | 3.44463100  | 0.24409000  |
| C | 0.40677200  | 2.72161900  | 1.17915300  |
| C | -0.52020100 | 3.30690800  | 2.11380900  |
| C | -1.06646900 | 2.28115500  | 2.82599900  |
| C | -0.47697100 | 1.06410600  | 2.32869600  |
| N | 0.43468100  | 1.35562000  | 1.33888700  |
| C | -0.81749500 | -0.20424500 | 2.77533600  |
| C | -0.28760900 | -1.38627800 | 2.27893200  |
| C | -0.60576300 | -2.69721600 | 2.78395600  |
| C | 0.15733600  | -3.58676700 | 2.08803600  |
| C | 0.94568700  | -2.82399200 | 1.15471100  |
| C | 1.89675100  | -3.36847500 | 0.30459000  |
| H | 2.02472500  | -4.44558900 | 0.31772500  |
| N | 0.64046600  | -1.48630400 | 1.26746700  |
| H | 0.20290500  | -4.66320200 | 2.19087900  |
| H | -1.31651700 | -2.89185600 | 3.57658100  |
| H | -1.55056900 | -0.27640600 | 3.57151600  |
| H | -1.80834300 | 2.32430800  | 3.61283900  |
| H | -0.72048000 | 4.36746000  | 2.19397400  |
| H | 1.01147300  | 4.52246900  | 0.23595700  |
| H | 2.74341400  | 4.72658600  | -1.72009100 |
| H | 4.27038800  | 2.95431500  | -3.09715200 |
| H | 4.60116300  | 0.35789400  | -3.00215700 |

|   |             |             |             |
|---|-------------|-------------|-------------|
| H | 4.96024900  | -2.23694500 | -2.94903100 |
| H | 3.86081900  | -4.27894900 | -1.53872400 |
| S | 3.22371500  | 0.13624100  | 1.81719700  |
| H | 2.66900500  | 1.02406600  | 2.67054800  |
| O | 0.18657800  | -0.10568700 | -1.00449100 |
| H | -0.40924600 | -0.82286300 | -0.71970600 |
| C | -3.26387700 | 1.19504900  | -1.62028700 |
| C | -4.16603600 | 0.17793100  | -2.34485800 |
| C | -4.38927100 | -1.11249900 | -1.47321800 |
| C | -5.48364700 | -0.25080000 | -0.72944600 |
| C | -5.64829200 | 0.54806000  | -2.05825400 |
| H | -5.88832500 | 1.61273800  | -1.96554000 |
| H | -6.35105300 | 0.08424200  | -2.75321300 |
| C | -4.83378900 | 0.67743900  | 0.28632500  |
| C | -3.74130900 | 1.41086100  | -0.20787800 |
| H | -3.21428600 | 2.11469400  | 0.43312100  |
| C | -5.30555100 | 0.78239300  | 1.57923100  |
| H | -4.84314900 | 1.45806700  | 2.29442600  |
| H | -6.15427800 | 0.19835500  | 1.92275300  |
| H | -6.35077800 | -0.77644500 | -0.31534200 |
| C | -5.01451600 | -2.25892700 | -2.28487900 |
| H | -5.36268300 | -3.05571100 | -1.61533000 |
| H | -4.26844000 | -2.69666600 | -2.96050000 |
| H | -5.86626500 | -1.94394400 | -2.89453000 |
| C | -3.21836300 | -1.68510600 | -0.66892900 |
| H | -2.46735500 | -2.11364200 | -1.34663000 |
| H | -3.56325500 | -2.49530000 | -0.01351700 |
| H | -2.72864700 | -0.93914300 | -0.03728000 |
| H | -3.85423900 | 0.03342800  | -3.38600600 |
| H | -3.26644700 | 2.14837700  | -2.17388600 |
| H | -2.21366800 | 0.86116100  | -1.61953100 |

Coordinate V

|    |             |             |             |
|----|-------------|-------------|-------------|
| Fe | -1.69311300 | 0.05888800  | 0.39213000  |
| N  | -0.21677700 | -0.55247500 | 1.63078300  |
| C  | 0.05827400  | -1.85265800 | 2.01293600  |
| C  | 1.03268100  | -1.86832500 | 3.06987300  |
| C  | 1.33768900  | -0.56859400 | 3.34772500  |
| C  | 0.55129900  | 0.24441400  | 2.45969600  |
| C  | 0.56025700  | 1.63027000  | 2.45611200  |
| C  | -0.20676900 | 2.41938000  | 1.61247100  |
| C  | -0.15454600 | 3.85563700  | 1.58621000  |
| C  | -1.01564800 | 4.26593200  | 0.61169200  |
| C  | -1.59618100 | 3.08120000  | 0.04115800  |
| N  | -1.10177800 | 1.95372300  | 0.66824000  |
| C  | -2.50077900 | 3.08764800  | -1.00934600 |
| C  | -3.03598400 | 1.94935400  | -1.59090300 |
| C  | -3.97094100 | 1.96370900  | -2.68500000 |
| C  | -4.28166500 | 0.66492300  | -2.95584200 |
| C  | -3.53641100 | -0.14453900 | -2.02811500 |
| N  | -2.76812400 | 0.65240100  | -1.20388000 |
| C  | -3.60260200 | -1.52776900 | -1.97576900 |
| C  | -2.88114900 | -2.31669000 | -1.09296400 |
| C  | -2.92312100 | -3.75355800 | -1.07627400 |
| C  | -2.05734900 | -4.16398800 | -0.10590200 |
| C  | -1.48486200 | -2.97849400 | 0.47177500  |
| C  | -0.53005700 | -2.98740400 | 1.47745600  |
| H  | -0.21756200 | -3.95005000 | 1.86775500  |
| N  | -2.00320700 | -1.85070100 | -0.13405100 |
| H  | -1.81048500 | -5.17359200 | 0.19582700  |
| H  | -3.53350800 | -4.35666600 | -1.73574800 |
| H  | -4.25421600 | -2.02935800 | -2.68332400 |

|   |             |             |             |
|---|-------------|-------------|-------------|
| H | -4.95126900 | 0.27334900  | -3.71057500 |
| H | -4.33201200 | 2.86077700  | -3.17101900 |
| H | -2.80125100 | 4.04965500  | -1.41059100 |
| H | -1.24014400 | 5.27451400  | 0.28976300  |
| H | 0.47386900  | 4.45782100  | 2.22939100  |
| H | 1.21843000  | 2.13283300  | 3.15677900  |
| H | 2.02759100  | -0.17969300 | 4.08528700  |
| H | 1.42067000  | -2.76648400 | 3.53246600  |
| S | -3.54260400 | 0.06566400  | 2.04851100  |
| H | -3.49070700 | 1.38926400  | 2.31720300  |
| C | 3.12433500  | 1.15058700  | -1.48698900 |
| C | 4.66330800  | 1.21510600  | -1.45465900 |
| C | 5.24664100  | 0.32329900  | -0.30056300 |
| C | 5.05613600  | -0.87614000 | -1.31746300 |
| C | 5.23916600  | 0.17353100  | -2.45826800 |
| H | 4.70176500  | 0.01024300  | -3.39766600 |
| H | 6.29043000  | 0.34718700  | -2.69248200 |
| C | 3.61986100  | -1.34380200 | -1.28290000 |
| C | 2.62811400  | -0.29247500 | -1.78487100 |
| H | 2.57584000  | -0.40161100 | -2.87468000 |
| C | 3.23524100  | -2.55173900 | -0.85948400 |
| H | 2.18676900  | -2.83436400 | -0.82884700 |
| H | 3.95901500  | -3.29349800 | -0.52983900 |
| H | 5.76214600  | -1.71087500 | -1.24598600 |
| C | 6.73161800  | 0.61934600  | -0.03164500 |
| H | 7.17036000  | -0.16701800 | 0.59522100  |
| H | 6.83462100  | 1.56938400  | 0.50807900  |
| H | 7.33333500  | 0.69141100  | -0.94204700 |
| C | 4.52501700  | 0.26677800  | 1.04730300  |
| H | 4.57954200  | 1.24007900  | 1.55192800  |
| H | 5.00393500  | -0.47155900 | 1.70315000  |



|   |            |             |             |
|---|------------|-------------|-------------|
| H | 3.47196500 | -0.01129100 | 0.96911900  |
| H | 5.02314900 | 2.24908700  | -1.51299800 |
| H | 2.72949800 | 1.82381300  | -2.25728800 |
| H | 2.70607100 | 1.48968700  | -0.53089200 |
| O | 1.28242800 | -0.51423500 | -1.37044600 |
| H | 1.24509600 | -0.51114800 | -0.39832200 |

Coordinate I (trans)

|    |             |             |             |
|----|-------------|-------------|-------------|
| Fe | 1.50148200  | -0.00305600 | 0.12354000  |
| N  | 1.52142100  | -1.96813400 | 0.58106100  |
| C  | 1.02598600  | -2.55437800 | 1.71881500  |
| C  | 1.13854600  | -3.99054700 | 1.63803700  |
| C  | 1.70154100  | -4.27008700 | 0.43036700  |
| C  | 1.93323500  | -3.00320900 | -0.21988600 |
| C  | 2.50829200  | -2.85645400 | -1.47833300 |
| C  | 2.77119800  | -1.64599300 | -2.11141300 |
| C  | 3.40142400  | -1.51890000 | -3.40308200 |
| C  | 3.48582000  | -0.18567400 | -3.66547700 |
| C  | 2.90487300  | 0.49573300  | -2.53393200 |
| N  | 2.48093300  | -0.40911200 | -1.59321200 |
| C  | 2.78794300  | 1.87718200  | -2.42359100 |
| C  | 2.23472200  | 2.56310200  | -1.34654900 |
| C  | 2.13619700  | 4.00002000  | -1.25975000 |
| C  | 1.54130900  | 4.27778300  | -0.06679300 |
| C  | 1.28020300  | 3.00905300  | 0.56859800  |
| N  | 1.71073900  | 1.97585600  | -0.22376600 |
| C  | 0.68625800  | 2.86138000  | 1.81822300  |
| C  | 0.44643800  | 1.65144000  | 2.46237300  |
| C  | -0.14513800 | 1.52736000  | 3.77251700  |
| C  | -0.19806700 | 0.19512100  | 4.05039800  |

|   |             |             |             |
|---|-------------|-------------|-------------|
| C | 0.36029900  | -0.48647700 | 2.90779900  |
| C | 0.48431600  | -1.86836000 | 2.80062000  |
| H | 0.12828600  | -2.46331400 | 3.63580100  |
| N | 0.75038000  | 0.41572100  | 1.95185700  |
| H | -0.57249500 | -0.29711900 | 4.93826800  |
| H | -0.46528300 | 2.36023400  | 4.38451900  |
| H | 0.39392100  | 3.76748600  | 2.33940300  |
| H | 1.29801400  | 5.24157500  | 0.36073500  |
| H | 2.48376500  | 4.68766000  | -2.01938600 |
| H | 3.16386600  | 2.47287400  | -3.24946500 |
| H | 3.89848400  | 0.30854800  | -4.53514600 |
| H | 3.73111100  | -2.35118800 | -4.01086500 |
| H | 2.78750900  | -3.76305500 | -2.00574500 |
| H | 1.94729000  | -5.23398000 | 0.00454400  |
| H | 0.82332800  | -4.67667100 | 2.41302200  |
| S | 3.78701500  | 0.12455200  | 1.20665200  |
| H | 4.30560200  | -1.00989800 | 0.68719500  |
| O | 0.02635200  | -0.07796000 | -0.58453100 |
| C | -4.00819500 | 1.45258900  | -1.54116700 |
| C | -4.67359400 | 0.16208100  | -2.04934800 |
| C | -3.81944000 | -1.06062800 | -1.60874300 |
| C | -4.58712200 | -0.98303000 | -0.25237700 |
| C | -5.78448200 | -0.33235800 | -1.05620900 |
| C | -3.94137800 | 0.06038000  | 0.62563900  |
| C | -3.35006000 | 1.23663200  | -0.14638200 |
| H | -3.39258200 | 2.15122900  | 0.45605200  |
| C | -3.88051100 | -0.04338000 | 1.95861800  |
| H | -3.43414900 | 0.73420700  | 2.57544400  |
| H | -4.27173000 | -0.91496900 | 2.47941100  |
| H | -4.79711200 | -1.91026800 | 0.29304800  |
| H | -4.95680400 | 0.24578800  | -3.10587500 |

|   |             |             |             |
|---|-------------|-------------|-------------|
| H | -4.74955400 | 2.25954800  | -1.50181500 |
| H | -3.23976700 | 1.77384400  | -2.25542600 |
| H | -2.28421800 | 1.02338900  | -0.29933900 |
| H | -4.05269900 | -1.96965900 | -2.16647300 |
| H | -2.73191900 | -0.93620000 | -1.57915600 |
| C | -6.66651700 | 0.69768500  | -0.34539500 |
| H | -7.32657400 | 1.19986900  | -1.06479300 |
| H | -7.30619100 | 0.20239300  | 0.39668200  |
| H | -6.09544500 | 1.46682600  | 0.18070500  |
| C | -6.69678400 | -1.39601000 | -1.68744800 |
| H | -7.30254500 | -1.88914100 | -0.91653100 |
| H | -7.38646400 | -0.92814800 | -2.40192100 |
| H | -6.14541900 | -2.17420400 | -2.22347700 |

Coordinate II (trans) – TS (-1823.33)

|    |             |             |             |
|----|-------------|-------------|-------------|
| Fe | -1.28190100 | -0.00908700 | 0.19898600  |
| N  | -2.16931200 | 1.02573700  | -1.28449900 |
| C  | -2.16472500 | 2.38949800  | -1.44042700 |
| C  | -2.85579600 | 2.76130100  | -2.65367600 |
| C  | -3.27877100 | 1.60381600  | -3.23195900 |
| C  | -2.83956700 | 0.52936800  | -2.37236500 |
| C  | -3.05575200 | -0.82402800 | -2.62033000 |
| C  | -2.62970500 | -1.87424300 | -1.81081400 |
| C  | -2.85077800 | -3.27348100 | -2.09278000 |
| C  | -2.26657600 | -3.97057100 | -1.07979500 |
| C  | -1.69549300 | -2.99408200 | -0.18091900 |
| N  | -1.93061200 | -1.72276200 | -0.64144500 |
| C  | -1.01498600 | -3.30785100 | 0.99166000  |
| C  | -0.48791600 | -2.39831900 | 1.90865400  |
| C  | 0.14368800  | -2.76959400 | 3.15335700  |
| C  | 0.47443700  | -1.60747900 | 3.78269600  |

|   |             |             |             |
|---|-------------|-------------|-------------|
| C | 0.05141200  | -0.53532500 | 2.91345000  |
| N | -0.52929400 | -1.03616100 | 1.77724400  |
| C | 0.21695800  | 0.82065900  | 3.18816700  |
| C | -0.15670700 | 1.86912100  | 2.34986500  |
| C | 0.05670600  | 3.26752100  | 2.63821900  |
| C | -0.43395100 | 3.96175800  | 1.57312100  |
| C | -0.95285200 | 2.98222200  | 0.64718400  |
| C | -1.58822600 | 3.29467000  | -0.55465400 |
| H | -1.66159600 | 4.34722400  | -0.81109600 |
| N | -0.76911800 | 1.71572200  | 1.13303600  |
| H | -0.45985600 | 5.03239400  | 1.41763700  |
| H | 0.52071600  | 3.64867100  | 3.53851000  |
| H | 0.69038500  | 1.08234200  | 4.12950600  |
| H | 0.95838000  | -1.47118000 | 4.74094300  |
| H | 0.29667200  | -3.78723300 | 3.48819500  |
| H | -0.90505200 | -4.36189900 | 1.22785600  |
| H | -2.21912300 | -5.04209900 | -0.93568000 |
| H | -3.38220700 | -3.65198700 | -2.95615000 |
| H | -3.59850700 | -1.08255300 | -3.52433600 |
| H | -3.83354600 | 1.47040300  | -4.15144700 |
| H | -2.99152700 | 3.77804500  | -2.99851800 |
| S | -3.41326300 | 0.09544900  | 1.43754600  |
| H | -4.24984000 | -0.20232900 | 0.41861500  |
| O | 0.20195300  | -0.09436300 | -0.71857200 |
| C | 3.12057900  | -1.11815900 | 0.35781500  |
| C | 3.98135400  | -1.42950400 | -0.87868000 |
| C | 3.28505000  | -0.83276400 | -2.13427900 |
| C | 3.98570900  | 0.51003900  | -1.76155900 |
| C | 5.11368800  | -0.35848700 | -1.07121500 |
| C | 3.17152500  | 1.21027900  | -0.69772400 |
| C | 2.52645600  | 0.29859600  | 0.27535300  |

|   |            |             |             |
|---|------------|-------------|-------------|
| H | 2.31483000 | 0.75921700  | 1.24317600  |
| C | 3.03864200 | 2.55249900  | -0.64502900 |
| H | 2.46450600 | 3.03868500  | 0.14063900  |
| H | 3.50343300 | 3.19796300  | -1.38628100 |
| H | 4.29248300 | 1.19107900  | -2.56304200 |
| H | 4.28433900 | -2.48332200 | -0.89930700 |
| H | 3.71848700 | -1.22281900 | 1.27378300  |
| H | 2.31160400 | -1.85567100 | 0.43739000  |
| H | 1.32547400 | 0.13440800  | -0.17375600 |
| H | 3.65731300 | -1.25034400 | -3.07174000 |
| H | 2.19094300 | -0.83637000 | -2.14878300 |
| C | 5.82594900 | 0.20740800  | 0.16035000  |
| H | 6.44355700 | -0.56672600 | 0.63409100  |
| H | 6.49426100 | 1.02837700  | -0.13014100 |
| H | 5.13970600 | 0.59782800  | 0.91629800  |
| C | 6.18062900 | -0.81641600 | -2.07800600 |
| H | 6.82079000 | 0.02626200  | -2.36846400 |
| H | 6.82477300 | -1.58131100 | -1.62544800 |
| H | 5.75709100 | -1.24151500 | -2.99267800 |

Coordinate III (trans)

|    |             |             |             |
|----|-------------|-------------|-------------|
| Fe | -1.45890100 | 0.02709200  | 0.15179600  |
| N  | -1.67982300 | 1.93069700  | -0.45795800 |
| C  | -1.26014800 | 3.06406000  | 0.20157700  |
| C  | -1.53681700 | 4.22880800  | -0.60033900 |
| C  | -2.10705200 | 3.78830100  | -1.75659100 |
| C  | -2.18354800 | 2.35227700  | -1.66627300 |
| C  | -2.67283700 | 1.53248000  | -2.67275300 |
| C  | -2.72638000 | 0.14868600  | -2.60589000 |
| C  | -3.27433400 | -0.69349200 | -3.63944000 |
| C  | -3.19832000 | -1.97624800 | -3.18689500 |

|   |             |             |             |
|---|-------------|-------------|-------------|
| C | -2.60231300 | -1.92375700 | -1.87551000 |
| N | -2.30545000 | -0.62122900 | -1.54742000 |
| C | -2.39554300 | -3.03116400 | -1.06769400 |
| C | -1.84696000 | -2.98866600 | 0.20627300  |
| C | -1.59867500 | -4.15016300 | 1.02176300  |
| C | -1.00984400 | -3.71060800 | 2.16942900  |
| C | -0.89679100 | -2.27841200 | 2.06127500  |
| N | -1.42790800 | -1.85632700 | 0.86398600  |
| C | -0.30973000 | -1.46782000 | 3.02189500  |
| C | -0.17016700 | -0.09146600 | 2.91803300  |
| C | 0.38056200  | 0.74974100  | 3.94965600  |
| C | 0.28422000  | 2.03575800  | 3.50691600  |
| C | -0.32232000 | 1.98538500  | 2.20115400  |
| C | -0.63474600 | 3.10154300  | 1.43874000  |
| H | -0.37077200 | 4.07450000  | 1.83915800  |
| N | -0.57000600 | 0.67865700  | 1.84954200  |
| H | 0.58125000  | 2.94716700  | 4.00942100  |
| H | 0.77383600  | 0.38662700  | 4.89033200  |
| H | 0.06025400  | -1.94415600 | 3.92347400  |
| H | -0.66828600 | -4.28862500 | 3.01831000  |
| H | -1.84056800 | -5.16445000 | 0.73173500  |
| H | -2.68115100 | -4.00132500 | -1.46002100 |
| H | -3.51706200 | -2.88641800 | -3.67827900 |
| H | -3.66877500 | -0.33027500 | -4.57961900 |
| H | -3.04218100 | 2.00836400  | -3.57480800 |
| H | -2.44279400 | 4.36615700  | -2.60788700 |
| H | -1.30605600 | 5.24391800  | -0.30412500 |
| S | -3.55716600 | 0.15054700  | 1.21660700  |
| H | -3.86520000 | 1.42762000  | 0.90312300  |
| O | 0.15255200  | -0.13704200 | -0.62672000 |
| C | 3.53926400  | -1.66816700 | -0.07947400 |

|   |            |             |             |
|---|------------|-------------|-------------|
| C | 4.28570300 | -1.32858300 | -1.38361500 |
| C | 3.54654000 | -0.15042600 | -2.07751800 |
| C | 4.36686100 | 0.78363400  | -1.13638500 |
| C | 5.47893300 | -0.33844000 | -1.11794300 |
| C | 3.64897700 | 0.83788000  | 0.20365900  |
| C | 3.21762300 | -0.41097200 | 0.68786700  |
| H | 2.71147500 | -0.48558800 | 1.64880400  |
| C | 3.45104100 | 2.02855800  | 0.87511300  |
| H | 2.93465800 | 2.05743800  | 1.83100600  |
| H | 3.80453300 | 2.97176800  | 0.46926800  |
| H | 4.65209000 | 1.77911200  | -1.49293500 |
| H | 4.50050900 | -2.23032400 | -1.96892300 |
| H | 4.13456700 | -2.35239300 | 0.54590900  |
| H | 2.61377100 | -2.21721600 | -0.31523500 |
| H | 0.85450300 | 0.08872000  | 0.01445300  |
| H | 3.81410900 | -0.03579300 | -3.12969100 |
| H | 2.45678700 | -0.11678600 | -1.97764100 |
| C | 6.33654000 | -0.51915700 | 0.13783800  |
| H | 6.93575400 | -1.43572300 | 0.06102300  |
| H | 7.03531800 | 0.32060500  | 0.24597200  |
| H | 5.74754500 | -0.57867200 | 1.05648100  |
| C | 6.42135900 | -0.23079400 | -2.32796400 |
| H | 7.10338400 | 0.62030400  | -2.20629900 |
| H | 7.03477100 | -1.13702300 | -2.41231900 |
| H | 5.89509500 | -0.09957700 | -3.27781400 |

Coordinate V (trans)

|    |            |             |            |
|----|------------|-------------|------------|
| Fe | 1.47893300 | -0.04784500 | 0.22564300 |
| N  | 0.87630600 | -1.60018500 | 1.35522800 |
| C  | 0.44222300 | -1.55333200 | 2.66232500 |
| C  | 0.22090600 | -2.88559900 | 3.16268900 |

|   |             |             |             |
|---|-------------|-------------|-------------|
| C | 0.53318200  | -3.74426400 | 2.15146200  |
| C | 0.94730800  | -2.93771100 | 1.03224900  |
| C | 1.37240300  | -3.45003000 | -0.18467200 |
| C | 1.78030500  | -2.68045500 | -1.26472300 |
| C | 2.18952200  | -3.22157000 | -2.53331700 |
| C | 2.47943000  | -2.16174900 | -3.34110500 |
| C | 2.24653500  | -0.97075400 | -2.56835700 |
| N | 1.83012100  | -1.30213400 | -1.29534300 |
| C | 2.39796300  | 0.31739300  | -3.06192300 |
| C | 2.13591700  | 1.47439300  | -2.34356900 |
| C | 2.30693300  | 2.80729100  | -2.85919700 |
| C | 1.98024100  | 3.66652600  | -1.85222300 |
| C | 1.60980100  | 2.86060300  | -0.71871500 |
| N | 1.69376300  | 1.52049200  | -1.03725900 |
| C | 1.24124600  | 3.36999000  | 0.51771600  |
| C | 0.90081300  | 2.59832600  | 1.62040400  |
| C | 0.49293500  | 3.14003000  | 2.88906600  |
| C | 0.21766600  | 2.08063000  | 3.70292000  |
| C | 0.45538900  | 0.88918600  | 2.93321800  |
| C | 0.25265200  | -0.39903400 | 3.40753500  |
| H | -0.08939300 | -0.51018200 | 4.43109400  |
| N | 0.88087300  | 1.21893600  | 1.66210700  |
| H | -0.12459600 | 2.08966400  | 4.72965500  |
| H | 0.42361800  | 4.19708800  | 3.11092500  |
| H | 1.21448400  | 4.44859600  | 0.63112100  |
| H | 1.98717000  | 4.74883500  | -1.85953200 |
| H | 2.63715300  | 3.03911800  | -3.86354600 |
| H | 2.73825900  | 0.42620900  | -4.08631700 |
| H | 2.81094500  | -2.16919100 | -4.37138700 |
| H | 2.23461900  | -4.27809300 | -2.76381500 |
| H | 1.38161500  | -4.52842200 | -0.30284600 |



|   |             |             |             |
|---|-------------|-------------|-------------|
| H | 0.49434200  | -4.82591500 | 2.14748900  |
| H | -0.12767100 | -3.11609800 | 4.16111600  |
| S | 3.85294000  | -0.03812300 | 1.05586200  |
| H | 4.28988600  | -1.03556000 | 0.25536200  |
| C | -2.80352200 | -1.06486100 | 0.26505700  |
| C | -3.99687500 | -1.33326200 | -0.66747000 |
| C | -5.11445700 | -0.24453600 | -0.49020500 |
| C | -4.23048500 | 0.62430100  | -1.47500600 |
| C | -3.70190400 | -0.71983500 | -2.06485800 |
| H | -2.66593300 | -0.73845400 | -2.41187600 |
| H | -4.35108000 | -1.11063800 | -2.85052800 |
| C | -3.12804300 | 1.29175700  | -0.69597500 |
| C | -2.18291400 | 0.33477300  | 0.03358200  |
| C | -2.94977900 | 2.61634900  | -0.62707700 |
| H | -2.16498600 | 3.05799300  | -0.01538300 |
| H | -3.58232200 | 3.30671600  | -1.18047200 |
| H | -4.75417700 | 1.32769200  | -2.13188100 |
| C | -6.44429300 | -0.66495000 | -1.13511700 |
| H | -7.12469300 | 0.19303900  | -1.20547100 |
| H | -6.93690800 | -1.42956000 | -0.52085600 |
| H | -6.32491800 | -1.07709600 | -2.14133100 |
| C | -5.41103500 | 0.30696100  | 0.90713400  |
| H | -5.87174000 | -0.46702100 | 1.53444700  |
| H | -6.11914700 | 1.14307600  | 0.84294000  |
| H | -4.52337200 | 0.67489900  | 1.42887900  |
| H | -4.31256900 | -2.38189100 | -0.61253100 |
| H | -2.01619100 | -1.80726300 | 0.09514600  |
| H | -3.11083400 | -1.16578700 | 1.31206300  |
| H | -1.87378600 | 0.77819700  | 0.98730400  |
| O | -0.98841900 | 0.13980900  | -0.77221300 |
| H | -0.73753500 | 1.00632100  | -1.13679300 |

# Delta Site – Sextet state

## Coordinate I (cis)

|    |             |             |             |
|----|-------------|-------------|-------------|
| Fe | -1.41563300 | 0.01315200  | 0.11997500  |
| N  | -0.80922400 | -0.82611200 | 1.92806100  |
| C  | -0.64446700 | -2.15569800 | 2.19524600  |
| C  | -0.11328300 | -2.31794100 | 3.53301900  |
| C  | 0.03425500  | -1.06440400 | 4.05329900  |
| C  | -0.40653700 | -0.13359500 | 3.03513600  |
| C  | -0.42558700 | 1.26435700  | 3.15844600  |
| C  | -0.85700200 | 2.21022900  | 2.21655200  |
| C  | -0.86758900 | 3.64673900  | 2.40326800  |
| C  | -1.35992000 | 4.19151800  | 1.25288100  |
| C  | -1.65224600 | 3.08963500  | 0.35922700  |
| N  | -1.33869000 | 1.90961700  | 0.97311500  |
| C  | -2.18930400 | 3.19760500  | -0.93267300 |
| C  | -2.51638000 | 2.15880700  | -1.81794700 |
| C  | -3.09484900 | 2.31823000  | -3.13593800 |
| C  | -3.25915000 | 1.06431500  | -3.64947500 |
| C  | -2.78116500 | 0.13448300  | -2.64723600 |
| N  | -2.34407200 | 0.82867200  | -1.55374500 |
| C  | -2.76350800 | -1.26332300 | -2.76925300 |
| C  | -2.31947300 | -2.20798500 | -1.83146200 |
| C  | -2.34692000 | -3.64621700 | -2.00309400 |
| C  | -1.83845000 | -4.18990300 | -0.85921500 |
| C  | -1.49887600 | -3.08496200 | 0.01393900  |
| C  | -0.95971800 | -3.19396500 | 1.30494900  |
| H  | -0.77391500 | -4.20277300 | 1.66221800  |
| N  | -1.80124600 | -1.90512000 | -0.60405300 |
| H  | -1.70554200 | -5.23626000 | -0.61671900 |

|   |             |             |             |
|---|-------------|-------------|-------------|
| H | -2.71276900 | -4.15920000 | -2.88295300 |
| H | -3.14734200 | -1.66397700 | -3.70322300 |
| H | -3.66503600 | 0.78318100  | -4.61249700 |
| H | -3.34036100 | 3.26702500  | -3.59496700 |
| H | -2.38634100 | 4.20571600  | -1.28581200 |
| H | -1.51786800 | 5.23686100  | 1.02131100  |
| H | -0.54175000 | 4.15809000  | 3.29966700  |
| H | -0.06864500 | 1.66296200  | 4.10388400  |
| H | 0.40154600  | -0.78472800 | 5.03209300  |
| H | 0.10821100  | -3.26777000 | 4.00202900  |
| O | 0.09868300  | 0.09294500  | -0.51778700 |
| S | -3.71437500 | -0.11392600 | 1.10714500  |
| H | -4.17680000 | 1.06867700  | 0.64645200  |
| C | 3.77994500  | -0.63085400 | -2.19214700 |
| C | 5.11503500  | 0.10602700  | -1.99355600 |
| C | 5.06412400  | 1.04508700  | -0.73651300 |
| C | 5.39073800  | -0.26485700 | 0.08804500  |
| C | 6.08789300  | -0.80847500 | -1.19779500 |
| H | 6.03617200  | -1.88677000 | -1.38274300 |
| H | 7.13067600  | -0.49359100 | -1.27058700 |
| C | 4.12091900  | -1.04148800 | 0.33196500  |
| C | 3.40834900  | -1.48602500 | -0.94390200 |
| H | 3.69858400  | -2.52714100 | -1.13916100 |
| H | 2.32417500  | -1.49541200 | -0.79021300 |
| C | 3.66845600  | -1.33144100 | 1.55719600  |
| H | 2.73902300  | -1.87567700 | 1.71383700  |
| H | 4.21953100  | -1.04110700 | 2.44934800  |
| H | 5.98346700  | -0.14479900 | 1.00215600  |
| C | 6.23165500  | 2.04428200  | -0.70971300 |
| H | 6.30664200  | 2.52095400  | 0.27599000  |
| H | 6.06833700  | 2.83809300  | -1.45012100 |

|   |            |             |             |
|---|------------|-------------|-------------|
| H | 7.19945500 | 1.58345000  | -0.92919500 |
| C | 3.77235900 | 1.80466100  | -0.42113300 |
| H | 3.59023500 | 2.57956300  | -1.17755900 |
| H | 3.85699400 | 2.30916000  | 0.55041900  |
| H | 2.88887100 | 1.16258100  | -0.37924600 |
| H | 5.46941700 | 0.55255500  | -2.93087200 |
| H | 3.85153100 | -1.28497800 | -3.06988700 |
| H | 2.98728800 | 0.09416700  | -2.41134300 |

Coordinate (cis) – TS (-1896.64)

|    |             |             |             |
|----|-------------|-------------|-------------|
| Fe | 1.21189900  | 0.02333000  | 0.20323800  |
| N  | 0.33919400  | 0.21406400  | 2.08228300  |
| C  | 0.06834500  | 1.38781200  | 2.72532800  |
| C  | -0.54323200 | 1.10618600  | 4.00860400  |
| C  | -0.61902200 | -0.25286600 | 4.11978600  |
| C  | -0.05733300 | -0.80387200 | 2.90301400  |
| C  | 0.07203000  | -2.17344900 | 2.60840000  |
| C  | 0.62097200  | -2.76565800 | 1.45883800  |
| C  | 0.73271700  | -4.18778400 | 1.19715500  |
| C  | 1.33431000  | -4.31671000 | -0.02226000 |
| C  | 1.59422000  | -2.97287500 | -0.50379400 |
| N  | 1.14686000  | -2.06766700 | 0.41094400  |
| C  | 2.23184900  | -2.63242600 | -1.71047000 |
| C  | 2.54578500  | -1.35379000 | -2.19949100 |
| C  | 3.22295700  | -1.07238300 | -3.45056400 |
| C  | 3.32811500  | 0.28463700  | -3.54772500 |
| C  | 2.71495600  | 0.83962900  | -2.35687900 |
| N  | 2.25770500  | -0.17627200 | -1.56569200 |
| C  | 2.60402000  | 2.20743800  | -2.05265600 |
| C  | 2.03030800  | 2.79900500  | -0.91494800 |

|   |             |              |             |
|---|-------------|--------------|-------------|
| C | 1.94652400  | 4.22044100   | -0.63715100 |
| C | 1.31681100  | 4.34971200   | 0.56701200  |
| C | 1.01468700  | 3.00765700   | 1.02844400  |
| C | 0.36822100  | 2.66948100   | 2.22740300  |
| H | 0.07583700  | 3.50212000   | 2.86150400  |
| N | 1.46250100  | 2.10112900   | 0.11041600  |
| H | 1.07565800  | 5.26031700   | 1.10017000  |
| H | 2.32275900  | 5.00386300   | -1.28235700 |
| H | 3.01725400  | 2.89155200   | -2.78870100 |
| H | 3.77657500  | 0.86568600   | -4.34315400 |
| H | 3.56769900  | -1.82163300  | -4.15150900 |
| H | 2.53245900  | -3.46506100  | -2.34072400 |
| H | 1.58685900  | -5.22771600  | -0.54937700 |
| H | 0.39487600  | -4.97218200  | 1.86210700  |
| H | -0.29651700 | -2.85774500  | 3.36771700  |
| H | -1.01122200 | -0.83600900  | 4.94294000  |
| H | -0.86029600 | 1.85432100   | 4.72363200  |
| S | 3.34257800  | -0.04851900  | 1.40041100  |
| H | 4.11277800  | 0.54492800   | 0.46176600  |
| O | -0.29207700 | 0.09659100   | -0.69120900 |
| C | -3.26118400 | 0.42753000   | 0.83886800  |
| C | -4.58583300 | 0.74413400   | 0.12144700  |
| C | -4.40320000 | 0.83155400   | -1.43602600 |
| C | -4.49467700 | -0.74204000  | -1.39922800 |
| C | -5.35500200 | -0.58478600  | -0.10347000 |
| H | -5.24505000 | -1.36291800  | 0.65999100  |
| H | -6.41673800 | -0.444444200 | -0.31444400 |
| C | -3.19309900 | -1.38688200  | -0.97688800 |
| C | -2.52733000 | -0.76289800  | 0.19474400  |
| H | -2.14544700 | -1.49482900  | 0.91108900  |
| C | -2.70868200 | -2.48968300  | -1.58516600 |

|   |             |             |             |
|---|-------------|-------------|-------------|
| H | -1.79745600 | -2.97673100 | -1.24512700 |
| H | -3.21630800 | -2.93649200 | -2.43624000 |
| H | -4.93456400 | -1.24490400 | -2.26751500 |
| C | -5.63252600 | 1.44895500  | -2.12521800 |
| H | -5.57788400 | 1.29648500  | -3.21059800 |
| H | -5.66255900 | 2.53094000  | -1.94384900 |
| H | -6.58235900 | 1.03033200  | -1.78011000 |
| C | -3.15357300 | 1.49822800  | -2.01775800 |
| H | -3.19370500 | 2.58341900  | -1.85291600 |
| H | -3.11215800 | 1.33733900  | -3.10338000 |
| H | -2.21710200 | 1.13132600  | -1.59318000 |
| H | -5.10976300 | 1.57346800  | 0.61209600  |
| H | -3.47138600 | 0.20087400  | 1.89283300  |
| H | -2.61495400 | 1.31522800  | 0.84445000  |
| H | -1.36793000 | -0.32912100 | -0.21996000 |

Coordinate III (cis)

|    |            |             |             |
|----|------------|-------------|-------------|
| Fe | 1.17240200 | 0.04266800  | -0.03596400 |
| N  | 0.99719100 | -1.75620200 | 1.01870500  |
| C  | 0.12944400 | -2.00780700 | 2.05921400  |
| C  | 0.08490100 | -3.42594700 | 2.32244900  |
| C  | 0.93364200 | -4.02323300 | 1.43525700  |
| C  | 1.50666000 | -2.97346500 | 0.62755300  |
| C  | 2.45801400 | -3.16499400 | -0.37697700 |
| C  | 3.09174000 | -2.16873400 | -1.11533000 |
| C  | 4.08862400 | -2.39128100 | -2.13412700 |
| C  | 4.44151000 | -1.16707600 | -2.62473600 |
| C  | 3.66172500 | -0.18397500 | -1.91228500 |
| N  | 2.85735500 | -0.81381100 | -0.98415500 |
| C  | 3.70639000 | 1.19191900  | -2.12798200 |
| C  | 2.96559900 | 2.16167200  | -1.44694100 |

|   |             |             |             |
|---|-------------|-------------|-------------|
| C | 3.08265600  | 3.58662000  | -1.64754000 |
| C | 2.21937200  | 4.18345900  | -0.77425800 |
| C | 1.56940000  | 3.12638700  | -0.03657600 |
| N | 2.03492000  | 1.90513100  | -0.46837900 |
| C | 0.63605000  | 3.31638200  | 0.98270900  |
| C | 0.03493100  | 2.31929100  | 1.75297300  |
| C | -0.88187600 | 2.55353800  | 2.84364600  |
| C | -1.22153400 | 1.33037900  | 3.34731800  |
| C | -0.51478700 | 0.34309600  | 2.56597100  |
| C | -0.57788500 | -1.03716500 | 2.76765900  |
| H | -1.22250000 | -1.38689100 | 3.56815900  |
| N | 0.24216000  | 0.96753500  | 1.60305600  |
| H | -1.88066700 | 1.10691100  | 4.17639700  |
| H | -1.20649600 | 3.53010600  | 3.17943800  |
| H | 0.37107500  | 4.34255300  | 1.21836000  |
| H | 2.03931200  | 5.24076100  | -0.62771000 |
| H | 3.74942800  | 4.05839000  | -2.35790400 |
| H | 4.39608800  | 1.54689200  | -2.88763600 |
| H | 5.16266700  | -0.93965300 | -3.39937600 |
| H | 4.46458600  | -3.36291500 | -2.42814900 |
| H | 2.75122500  | -4.18982900 | -0.58330500 |
| H | 1.16835900  | -5.07545500 | 1.33789600  |
| H | -0.51353400 | -3.89246900 | 3.09445600  |
| S | 4.54762700  | -0.29752900 | 1.57590900  |
| H | 4.95573400  | 0.65656800  | 0.70993700  |
| O | -0.13824900 | -0.07180800 | -1.33158900 |
| H | -0.80070100 | -0.76620600 | -1.17815700 |
| C | -3.60890200 | 1.32372500  | -1.36546200 |
| C | -4.56781900 | 0.43059100  | -2.17539700 |
| C | -4.69844700 | -0.99977200 | -1.53356100 |
| C | -5.72434400 | -0.31133200 | -0.55008000 |

|   |             |             |             |
|---|-------------|-------------|-------------|
| C | -6.01901900 | 0.70775900  | -1.69263000 |
| H | -6.25684800 | 1.73271300  | -1.38823400 |
| H | -6.78075700 | 0.35877300  | -2.39260200 |
| C | -4.98768600 | 0.43538900  | 0.55258300  |
| C | -3.95067200 | 1.26966300  | 0.10095600  |
| H | -3.36909200 | 1.85781300  | 0.80805500  |
| C | -5.33645600 | 0.29610800  | 1.88090200  |
| H | -4.81237500 | 0.84258400  | 2.66097500  |
| H | -6.14547800 | -0.35947200 | 2.18933100  |
| H | -6.54476600 | -0.92314300 | -0.15990800 |
| C | -5.38798700 | -1.99773900 | -2.47826900 |
| H | -5.66615800 | -2.90958200 | -1.93467600 |
| H | -4.70503500 | -2.28936100 | -3.28651600 |
| H | -6.29523900 | -1.59938800 | -2.94141800 |
| C | -3.45322100 | -1.67850100 | -0.95453800 |
| H | -2.76516700 | -1.95947800 | -1.76374600 |
| H | -3.72906500 | -2.60220800 | -0.42964500 |
| H | -2.91525200 | -1.04592800 | -0.24300300 |
| H | -4.35457500 | 0.48160400  | -3.24963800 |
| H | -3.67370300 | 2.36064400  | -1.73426700 |
| H | -2.56106800 | 1.02291800  | -1.52348100 |

Coordinate V (cis)

|    |             |             |            |
|----|-------------|-------------|------------|
| Fe | 1.77992000  | -0.06959400 | 0.52495000 |
| N  | 0.13589700  | 0.57139600  | 1.66172000 |
| C  | -0.12500600 | 1.87541100  | 2.03005600 |
| C  | -1.09190500 | 1.89467300  | 3.09964300 |
| C  | -1.39977900 | 0.59482900  | 3.38467300 |
| C  | -0.62503200 | -0.22917700 | 2.48957200 |
| C  | -0.63996300 | -1.62339700 | 2.46352700 |
| C  | 0.10694100  | -2.44242000 | 1.61592200 |



|   |             |             |             |
|---|-------------|-------------|-------------|
| C | 0.02310200  | -3.88117300 | 1.56763700  |
| C | 0.87792100  | -4.29846300 | 0.58725400  |
| C | 1.49120700  | -3.11773100 | 0.03128700  |
| N | 1.01570500  | -1.99823800 | 0.67946100  |
| C | 2.40378700  | -3.10910900 | -1.02388300 |
| C | 2.97192600  | -1.98079600 | -1.61397300 |
| C | 3.89440300  | -1.99855800 | -2.72462500 |
| C | 4.21240100  | -0.70005100 | -2.99922200 |
| C | 3.48561500  | 0.11989500  | -2.05889100 |
| N | 2.73466900  | -0.68081200 | -1.22777100 |
| C | 3.53052900  | 1.51277700  | -2.00715300 |
| C | 2.81335800  | 2.33133700  | -1.13451500 |
| C | 2.83060600  | 3.77340500  | -1.14723100 |
| C | 1.96735200  | 4.19214300  | -0.17507300 |
| C | 1.41626900  | 3.00875600  | 0.43796300  |
| C | 0.46558500  | 3.00239000  | 1.45904400  |
| H | 0.14747500  | 3.96826900  | 1.83891800  |
| N | 1.95320600  | 1.88595000  | -0.15405700 |
| H | 1.71179800  | 5.20699500  | 0.10145400  |
| H | 3.42113300  | 4.37795300  | -1.82360700 |
| H | 4.16845200  | 2.00977600  | -2.73146500 |
| H | 4.87198200  | -0.32005000 | -3.76885100 |
| H | 4.24167000  | -2.89371200 | -3.22448400 |
| H | 2.68397500  | -4.07302700 | -1.43722600 |
| H | 1.07444100  | -5.31028900 | 0.25658200  |
| H | -0.61873000 | -4.48392100 | 2.19726600  |
| H | -1.30621500 | -2.11948900 | 3.16240600  |
| H | -2.08788600 | 0.21803200  | 4.13045700  |
| H | -1.47808500 | 2.79165400  | 3.56652900  |
| S | 3.56005200  | -0.06158400 | 2.12978100  |
| H | 3.48802200  | -1.38337700 | 2.40282200  |

|   |             |             |             |
|---|-------------|-------------|-------------|
| C | -2.98317900 | -1.13666400 | -1.48053600 |
| C | -4.52219900 | -1.21297800 | -1.48028700 |
| C | -5.13702900 | -0.31608600 | -0.34658600 |
| C | -4.93358800 | 0.87619900  | -1.36930900 |
| C | -5.08536000 | -0.18454500 | -2.50454600 |
| H | -4.53074000 | -0.02521900 | -3.43451800 |
| H | -6.13036300 | -0.36852700 | -2.75809700 |
| C | -3.50144500 | 1.35456700  | -1.30825800 |
| C | -2.49275400 | 0.30705900  | -1.78449600 |
| H | -2.43003600 | 0.40553500  | -2.87495200 |
| C | -3.13437400 | 2.56834700  | -0.88624700 |
| H | -2.08860800 | 2.85777100  | -0.83562000 |
| H | -3.86997800 | 3.30750800  | -0.57740500 |
| H | -5.64702100 | 1.70627500  | -1.31977400 |
| C | -6.62509200 | -0.62175900 | -0.10681600 |
| H | -7.08327600 | 0.16643800  | 0.50365100  |
| H | -6.73208100 | -1.56784400 | 0.43909200  |
| H | -7.20686400 | -0.70666300 | -1.02901000 |
| C | -4.44481900 | -0.24235000 | 1.01556800  |
| H | -4.49997600 | -1.21243500 | 1.52635000  |
| H | -4.94513400 | 0.49567000  | 1.65567800  |
| H | -3.39348600 | 0.04621700  | 0.95729400  |
| H | -4.87288500 | -2.25022500 | -1.53718900 |
| H | -2.56681800 | -1.81498600 | -2.23492900 |
| H | -2.58323600 | -1.46239300 | -0.51208300 |
| O | -1.15440000 | 0.54430700  | -1.35952000 |
| H | -1.11429400 | 0.52713800  | -0.38678700 |

Coordinate I (trans)

|    |            |             |            |
|----|------------|-------------|------------|
| Fe | 1.46514200 | -0.00013600 | 0.11637700 |
| N  | 1.77738300 | -2.05255500 | 0.25108300 |

|   |             |             |             |
|---|-------------|-------------|-------------|
| C | 1.37905100  | -2.86048900 | 1.27975100  |
| C | 1.66431600  | -4.24058200 | 0.94749600  |
| C | 2.23141400  | -4.23944900 | -0.29419400 |
| C | 2.29525000  | -2.85862600 | -0.72464600 |
| C | 2.81273500  | -2.40347100 | -1.94759600 |
| C | 2.91205000  | -1.07911800 | -2.39975700 |
| C | 3.48670200  | -0.65021000 | -3.65874900 |
| C | 3.39620700  | 0.71100700  | -3.69051300 |
| C | 2.76579200  | 1.11884900  | -2.45128800 |
| N | 2.48875600  | 0.01337800  | -1.69684400 |
| C | 2.48485100  | 2.43902700  | -2.06961800 |
| C | 1.89736000  | 2.88942900  | -0.87687700 |
| C | 1.64813200  | 4.27258000  | -0.52837800 |
| C | 1.07145200  | 4.27079100  | 0.70904500  |
| C | 0.96561600  | 2.88646000  | 1.11976900  |
| N | 1.47422700  | 2.08052100  | 0.14046700  |
| C | 0.43321900  | 2.42861400  | 2.33522500  |
| C | 0.32652700  | 1.10265100  | 2.78226500  |
| C | -0.20065000 | 0.67949400  | 4.06393900  |
| C | -0.10102000 | -0.68099600 | 4.10116800  |
| C | 0.48770600  | -1.09199100 | 2.84268300  |
| C | 0.78378100  | -2.41149500 | 2.46876300  |
| H | 0.52726900  | -3.18056600 | 3.19178300  |
| N | 0.73007800  | 0.00888900  | 2.07117500  |
| H | -0.39020200 | -1.35191300 | 4.89956000  |
| H | -0.58686500 | 1.34358000  | 4.82617500  |
| H | 0.06910000  | 3.19371800  | 3.01501700  |
| H | 0.74748600  | 5.11906900  | 1.29782500  |
| H | 1.88936900  | 5.12278100  | -1.15299300 |
| H | 2.76426900  | 3.20994500  | -2.78213000 |
| H | 3.72426300  | 1.38543800  | -4.47073500 |

|   |             |             |             |
|---|-------------|-------------|-------------|
| H | 3.90368300  | -1.31088200 | -4.40761000 |
| H | 3.19129000  | -3.16851400 | -2.61953200 |
| H | 2.57868800  | -5.08583800 | -0.87231400 |
| H | 1.45527500  | -5.08827500 | 1.58693400  |
| S | 3.72993900  | 0.25462800  | 1.15093600  |
| H | 4.27962100  | -0.88620900 | 0.68069600  |
| O | -0.01909100 | -0.13359400 | -0.58165700 |
| C | -3.91981300 | 1.22412300  | -1.74531700 |
| C | -4.56694800 | -0.13384100 | -2.06763900 |
| C | -3.76268900 | -1.26275700 | -1.36213600 |
| C | -4.62174900 | -0.94880300 | -0.09771200 |
| C | -5.75096300 | -0.44562500 | -1.08498900 |
| C | -4.02500100 | 0.23110100  | 0.62928500  |
| C | -3.36244200 | 1.25191900  | -0.29156300 |
| H | -3.42975800 | 2.25775300  | 0.13849400  |
| C | -4.06148400 | 0.36309900  | 1.96058300  |
| H | -3.65170000 | 1.23777300  | 2.46210700  |
| H | -4.50099100 | -0.40275900 | 2.59629700  |
| H | -4.88250900 | -1.76630200 | 0.58423500  |
| H | -4.77503200 | -0.23468600 | -3.14003300 |
| H | -4.65043100 | 2.02731800  | -1.89852400 |
| H | -3.09928800 | 1.41461400  | -2.44839400 |
| H | -2.29279100 | 1.00859900  | -0.33167100 |
| H | -3.96975200 | -2.25459900 | -1.76882500 |
| H | -2.67819200 | -1.13665600 | -1.27798800 |
| C | -6.66548200 | 0.69402400  | -0.62799100 |
| H | -7.26742000 | 1.06386700  | -1.46840000 |
| H | -7.36150700 | 0.33703100  | 0.14225400  |
| H | -6.12128700 | 1.54233700  | -0.20519400 |
| C | -6.63211500 | -1.60123200 | -1.58523400 |
| H | -7.29669000 | -1.95189600 | -0.78534300 |

|   |             |             |             |
|---|-------------|-------------|-------------|
| H | -7.26404400 | -1.26340800 | -2.41685600 |
| H | -6.05580000 | -2.46162100 | -1.93816900 |

Coordinate II (trans) – TS (-1860.77)

|    |             |             |             |
|----|-------------|-------------|-------------|
| Fe | -1.27238900 | -0.02234300 | 0.18745200  |
| N  | -1.48352100 | 2.06439800  | -0.04448600 |
| C  | -1.03455100 | 3.02295700  | 0.81572300  |
| C  | -1.32295600 | 4.33619700  | 0.26958200  |
| C  | -1.94753000 | 4.13478800  | -0.92768700 |
| C  | -2.04198900 | 2.69827100  | -1.11257000 |
| C  | -2.62492400 | 2.03366600  | -2.20494100 |
| C  | -2.76065200 | 0.65008900  | -2.40951200 |
| C  | -3.39657900 | 0.03116600  | -3.55556700 |
| C  | -3.32340700 | -1.31834800 | -3.36894200 |
| C  | -2.64188800 | -1.53257900 | -2.10788900 |
| N  | -2.31752900 | -0.32328900 | -1.55563400 |
| C  | -2.36158900 | -2.78624100 | -1.53821300 |
| C  | -1.72362200 | -3.06210000 | -0.31722800 |
| C  | -1.46610000 | -4.37543300 | 0.24440600  |
| C  | -0.83188000 | -4.17521000 | 1.43666500  |
| C  | -0.70161600 | -2.73955100 | 1.60446900  |
| N  | -1.25248300 | -2.10475400 | 0.52950500  |
| C  | -0.11183400 | -2.07610200 | 2.69097100  |
| C  | 0.02197900  | -0.68985500 | 2.89677100  |
| C  | 0.61585600  | -0.07228800 | 4.06374700  |
| C  | 0.53089100  | 1.27909500  | 3.88267600  |
| C  | -0.11387000 | 1.49080100  | 2.60369500  |
| C  | -0.40257900 | 2.74686300  | 2.03775300  |
| H  | -0.10169300 | 3.60899000  | 2.62669900  |
| N  | -0.40119700 | 0.28179100  | 2.03282500  |
| H  | 0.86502300  | 2.06547600  | 4.54698600  |

|   |             |             |             |
|---|-------------|-------------|-------------|
| H | 1.03234900  | -0.60933000 | 4.90604800  |
| H | 0.28501500  | -2.70940800 | 3.47972400  |
| H | -0.48267400 | -4.91939600 | 2.14083900  |
| H | -1.73808400 | -5.31549700 | -0.21815000 |
| H | -2.68649200 | -3.64873900 | -2.11365900 |
| H | -3.69410700 | -2.10445700 | -4.01391500 |
| H | -3.83858300 | 0.56915000  | -4.38418500 |
| H | -3.03255300 | 2.66774000  | -2.98755800 |
| H | -2.31397500 | 4.87853600  | -1.62351000 |
| H | -1.07749300 | 5.27699200  | 0.74526900  |
| S | -3.39147400 | 0.02766300  | 1.41338500  |
| H | -4.22359900 | -0.29757400 | 0.39937200  |
| O | 0.22745200  | -0.06570700 | -0.71561300 |
| C | 3.15106800  | -1.03980600 | 0.40910100  |
| C | 4.02084400  | -1.37960600 | -0.81345400 |
| C | 3.32307100  | -0.83142700 | -2.09020600 |
| C | 4.00554900  | 0.53104000  | -1.75741700 |
| C | 5.14084100  | -0.30114400 | -1.03498600 |
| C | 3.17762100  | 1.25380900  | -0.71972600 |
| C | 2.54297400  | 0.36688200  | 0.28081600  |
| H | 2.32146800  | 0.85535600  | 1.23264700  |
| C | 3.02332700  | 2.59511200  | -0.71229900 |
| H | 2.43657000  | 3.09690700  | 0.05388400  |
| H | 3.48029700  | 3.22345800  | -1.47272200 |
| H | 4.30734400  | 1.19035300  | -2.57862100 |
| H | 4.33667300  | -2.42968200 | -0.79935700 |
| H | 3.74559300  | -1.10876700 | 1.33070900  |
| H | 2.35044400  | -1.78424700 | 0.50970500  |
| H | 1.34005000  | 0.17710700  | -0.16898500 |
| C | 5.84052200  | 0.31227600  | 0.18098500  |
| H | 6.46468300  | -0.43905300 | 0.68201600  |

|   |            |             |             |
|---|------------|-------------|-------------|
| H | 6.50072200 | 1.13122300  | -0.13274900 |
| H | 5.14635900 | 0.71871600  | 0.92112100  |
| C | 6.21795300 | -0.77717700 | -2.02235800 |
| H | 6.86966200 | -1.51896500 | -1.54302000 |
| H | 5.80399400 | -1.23642100 | -2.92481200 |
| H | 6.84861400 | 0.06406300  | -2.33672600 |
| H | 3.70482200 | -1.27380800 | -3.01229600 |
| H | 2.22918400 | -0.84863000 | -2.10940000 |

Coordinate III (trans)

|    |             |             |             |
|----|-------------|-------------|-------------|
| Fe | -1.12068200 | -0.07210800 | -0.00282900 |
| N  | -2.60871100 | 0.89292600  | -1.15943700 |
| C  | -2.71755800 | 2.25831600  | -1.33356700 |
| C  | -3.55703500 | 2.53596900  | -2.47373700 |
| C  | -3.93494700 | 1.33266700  | -2.99635800 |
| C  | -3.33246300 | 0.30738500  | -2.17920600 |
| C  | -3.45558300 | -1.06480200 | -2.38633700 |
| C  | -2.90093200 | -2.07446600 | -1.59566500 |
| C  | -3.10555800 | -3.48980100 | -1.79265600 |
| C  | -2.42731600 | -4.13231300 | -0.79678300 |
| C  | -1.80083900 | -3.11346100 | 0.01128400  |
| N  | -2.10111900 | -1.86910600 | -0.49573400 |
| C  | -1.02677300 | -3.35321100 | 1.14690500  |
| C  | -0.43850700 | -2.38962100 | 1.96810600  |
| C  | 0.31423600  | -2.67015500 | 3.16819800  |
| C  | 0.70097100  | -1.46731100 | 3.68527900  |
| C  | 0.18683400  | -0.44604700 | 2.80304400  |
| N  | -0.50184100 | -1.03049900 | 1.76689900  |
| C  | 0.35115800  | 0.92891800  | 2.98342700  |
| C  | -0.17426100 | 1.93639900  | 2.17452900  |
| C  | -0.03564100 | 3.35275900  | 2.41598400  |

|   |             |             |             |
|---|-------------|-------------|-------------|
| C | -0.72102300 | 3.99511200  | 1.42455600  |
| C | -1.28561100 | 2.97541100  | 0.57339500  |
| C | -2.09688000 | 3.21815500  | -0.53730800 |
| H | -2.27846400 | 4.25795400  | -0.79167600 |
| N | -0.93157300 | 1.73110200  | 1.04222200  |
| H | -0.85156600 | 5.06025700  | 1.28241000  |
| H | 0.50643600  | 3.78810500  | 3.24576400  |
| H | 0.92224900  | 1.24498900  | 3.85098800  |
| H | 1.27335600  | -1.27709000 | 4.58421100  |
| H | 0.50647700  | -3.66086100 | 3.55976000  |
| H | -0.88453200 | -4.39125700 | 1.43167700  |
| H | -2.35742000 | -5.19678300 | -0.61273700 |
| H | -3.70198700 | -3.92387400 | -2.58495400 |
| H | -4.06043500 | -1.38117700 | -3.23062600 |
| H | -4.56548900 | 1.14568900  | -3.85623700 |
| H | -3.81610200 | 3.52745100  | -2.82259400 |
| S | -4.70710700 | 0.44140400  | 1.10885800  |
| H | -4.18234300 | -0.79537700 | 0.95882100  |
| O | 0.32968500  | -0.13705800 | -1.12514700 |
| C | 4.60535100  | -0.76271100 | 0.91506300  |
| C | 5.13424600  | -1.24391400 | -0.44883000 |
| C | 3.94970700  | -1.26348100 | -1.45502100 |
| C | 4.23372200  | 0.25558500  | -1.66244100 |
| C | 5.73501600  | -0.05054300 | -1.28006700 |
| C | 3.53866100  | 1.00527300  | -0.53610300 |
| C | 3.72988900  | 0.45002600  | 0.74313000  |
| H | 3.25895900  | 0.89992000  | 1.61431400  |
| C | 2.76887100  | 2.12850300  | -0.77360300 |
| H | 2.28185200  | 2.66078500  | 0.03979200  |
| H | 2.66240200  | 2.53919500  | -1.77348400 |
| H | 4.03719200  | 0.70461000  | -2.64174800 |



|   |            |             |             |
|---|------------|-------------|-------------|
| H | 5.74898700 | -2.14560700 | -0.34595300 |
| H | 5.43709500 | -0.53832600 | 1.60190400  |
| H | 4.03773900 | -1.57283100 | 1.40087200  |
| H | 1.05450300 | 0.49319600  | -0.94646400 |
| H | 4.15153400 | -1.86108200 | -2.34593300 |
| H | 2.96051500 | -1.52490900 | -1.06497400 |
| C | 6.55631900 | 1.02419300  | -0.56203200 |
| H | 7.51114300 | 0.60681100  | -0.21697600 |
| H | 6.78845700 | 1.84811400  | -1.24928700 |
| H | 6.04353700 | 1.45086800  | 0.30373200  |
| C | 6.54480500 | -0.54049700 | -2.49175200 |
| H | 6.75901500 | 0.29441000  | -3.17090800 |
| H | 7.50635800 | -0.95424300 | -2.16199100 |
| H | 6.03403600 | -1.31510400 | -3.07094500 |

Coordinate V (trans)

|    |             |             |             |
|----|-------------|-------------|-------------|
| Fe | -1.94003500 | 0.06607200  | 0.29143800  |
| N  | -2.30161400 | -0.37599000 | -1.71699300 |
| C  | -2.58026700 | 0.54076600  | -2.70623500 |
| C  | -3.06442200 | -0.14261400 | -3.88209800 |
| C  | -3.07719700 | -1.47596500 | -3.59107300 |
| C  | -2.60151700 | -1.61592600 | -2.23522300 |
| C  | -2.46063400 | -2.82455700 | -1.55471500 |
| C  | -1.97643200 | -2.98789600 | -0.25681600 |
| C  | -1.78677800 | -4.25591000 | 0.40343300  |
| C  | -1.26216400 | -3.98992600 | 1.63605400  |
| C  | -1.12610000 | -2.55783000 | 1.73614400  |
| N  | -1.57731100 | -1.96524600 | 0.57626500  |
| C  | -0.58907300 | -1.87919600 | 2.83024600  |
| C  | -0.38725200 | -0.50335000 | 2.93036600  |
| C  | 0.17062100  | 0.17360000  | 4.07499400  |

|   |             |             |             |
|---|-------------|-------------|-------------|
| C | 0.18852900  | 1.50707000  | 3.78146300  |
| C | -0.35768400 | 1.65498600  | 2.45475200  |
| N | -0.69248700 | 0.41656200  | 1.94752900  |
| C | -0.52470200 | 2.86663500  | 1.78484800  |
| C | -1.05159500 | 3.03443400  | 0.50414200  |
| C | -1.15888000 | 4.29355500  | -0.19048900 |
| C | -1.69020700 | 4.02737400  | -1.42024000 |
| C | -1.91218100 | 2.60400500  | -1.48501100 |
| C | -2.41063600 | 1.92028800  | -2.59372300 |
| H | -2.67137200 | 2.51860600  | -3.46126300 |
| N | -1.52493000 | 2.01847900  | -0.29836000 |
| H | -1.90554200 | 4.72317700  | -2.22100100 |
| H | -0.85385900 | 5.25014600  | 0.21398700  |
| H | -0.20228200 | 3.76350100  | 2.30470700  |
| H | 0.53932200  | 2.32393200  | 4.39904900  |
| H | 0.50420400  | -0.31723100 | 4.98029300  |
| H | -0.28442400 | -2.48236300 | 3.67990000  |
| H | -0.97838500 | -4.69289700 | 2.40870800  |
| H | -2.01760300 | -5.21956600 | -0.03220000 |
| H | -2.73506600 | -3.72647900 | -2.09305500 |
| H | -3.37403900 | -2.29827800 | -4.22940100 |
| H | -3.34827100 | 0.34430600  | -4.80630300 |
| S | -4.13489800 | 0.37093400  | 1.19245000  |
| H | -4.41608700 | -0.94810100 | 1.28103000  |
| C | 3.31963200  | -0.17265400 | -1.98607200 |
| C | 4.55865400  | -1.02454700 | -1.65998600 |
| C | 5.64707200  | -0.18008800 | -0.90665000 |
| C | 4.79054300  | -0.49022500 | 0.38823200  |
| C | 4.31639100  | -1.79148400 | -0.32951000 |
| H | 3.29773900  | -2.12775800 | -0.12462800 |
| H | 5.00894400  | -2.62229200 | -0.18191300 |

|   |            |             |             |
|---|------------|-------------|-------------|
| C | 3.64280100 | 0.48308300  | 0.46735300  |
| C | 2.66958300 | 0.42859700  | -0.71432200 |
| C | 3.46266400 | 1.34564900  | 1.47393100  |
| H | 2.64812500 | 2.06737400  | 1.47153000  |
| H | 4.12235100 | 1.35998600  | 2.33893800  |
| H | 5.33030700 | -0.56961700 | 1.33874400  |
| C | 7.01181600 | -0.88586900 | -0.87368800 |
| H | 7.67891800 | -0.39772700 | -0.15196900 |
| H | 7.49109000 | -0.82851200 | -1.85948100 |
| H | 6.94491500 | -1.94308900 | -0.60090600 |
| C | 5.87237800 | 1.28134400  | -1.30392800 |
| H | 6.31678900 | 1.34180400  | -2.30584400 |
| H | 6.56964200 | 1.76156900  | -0.60532200 |
| H | 4.95652200 | 1.87830300  | -1.30728500 |
| H | 4.89084600 | -1.59130800 | -2.53811300 |
| H | 2.55854900 | -0.78665700 | -2.48111200 |
| H | 3.58465200 | 0.62761100  | -2.68625000 |
| O | 1.54750000 | -0.42112800 | -0.38923000 |
| H | 2.29401100 | 1.44008800  | -0.92273000 |
| H | 1.14588800 | -0.08905000 | 0.43297900  |
